# Supplementary material for: 1,2,3-Triazole-tethered fluoroquinolone analogues with antibacterial potential: synthesis and in vitro cytotoxicity investigations
Source: Royal Society of Chemistry journal article supplement (doi:10.1039/d4ra08643k), 2025-01-01

## Supplementary Data

### **1,2,3 Triazole-Tethered Fluoroquinolone Analogues with Antibacterial Potential: Synthesis and In Vitro Cytotoxicity Investigations**

Upendra Kumar Patel<sup>a</sup>, Alka<sup>a</sup>, Punit Tiwari<sup>b</sup>, Ragini Tilak<sup>b</sup>, Gaurav Joshi<sup>c</sup>, Roshan Kumar<sup>d</sup>, Alka Agarwal<sup>a\*</sup>

<sup>a</sup>Department of Medicinal Chemistry, Institute of Medical Sciences, Banaras Hindu University, Varanasi, UP-221005, India.

<sup>b</sup>Department of Microbiology, Institute of Medical Sciences, Banaras Hindu University, Varanasi, UP-221005, India.

<sup>c</sup>Department of Pharmaceutical Sciences, Hemvati Nandan Bahuguna Garhwal University (Central University) Srinagar-246174, Dist. Garhwal (Uttarakhand), India.

<sup>d</sup>Department of Microbiology, Central University of Punjab, Ghudda, Bathinda-151401, India.

#### **\*Corresponding Author**

Prof. Alka Agarwal

Department of Medicinal Chemistry

Institute of Medical Sciences

Banaras Hindu University

Varanasi, 221005, U.P. India.

Email: [agarwal.dralka@gmail.com](mailto:agarwal.dralka@gmail.com)

## CONTENTS

| <b>S. No.</b> | <b>Contents</b>                                                                     |
|---------------|-------------------------------------------------------------------------------------|
| <b>1.</b>     | NMR Spectra of <b>1, 3, 4, 5, 6, 7</b> and <b>9, 10(a-i)</b> (Figure S1-S24).       |
| <b>2.</b>     | HRMS Spectra of <b>6,7, 9a, 9b, 9c, 9d, 9e, 9f</b> and <b>10f</b> (Figure S25-S29). |
| <b>3.</b>     | FT-IR spectra <b>6, 7</b> and <b>9, 10(a-i)</b> (Figure S29-S39)                    |

<sup>1</sup>H-NMR spectrum of compound **1**

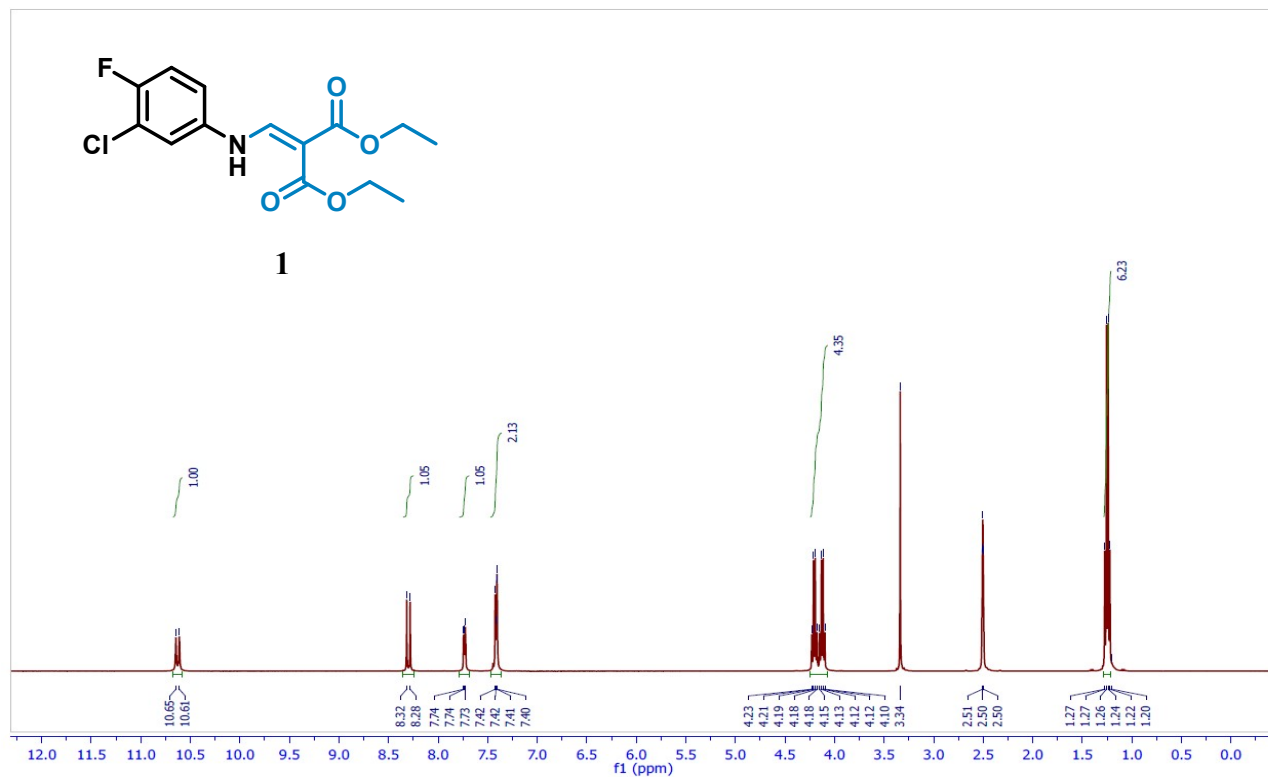

<sup>13</sup>C-NMR spectrum of compound **1**

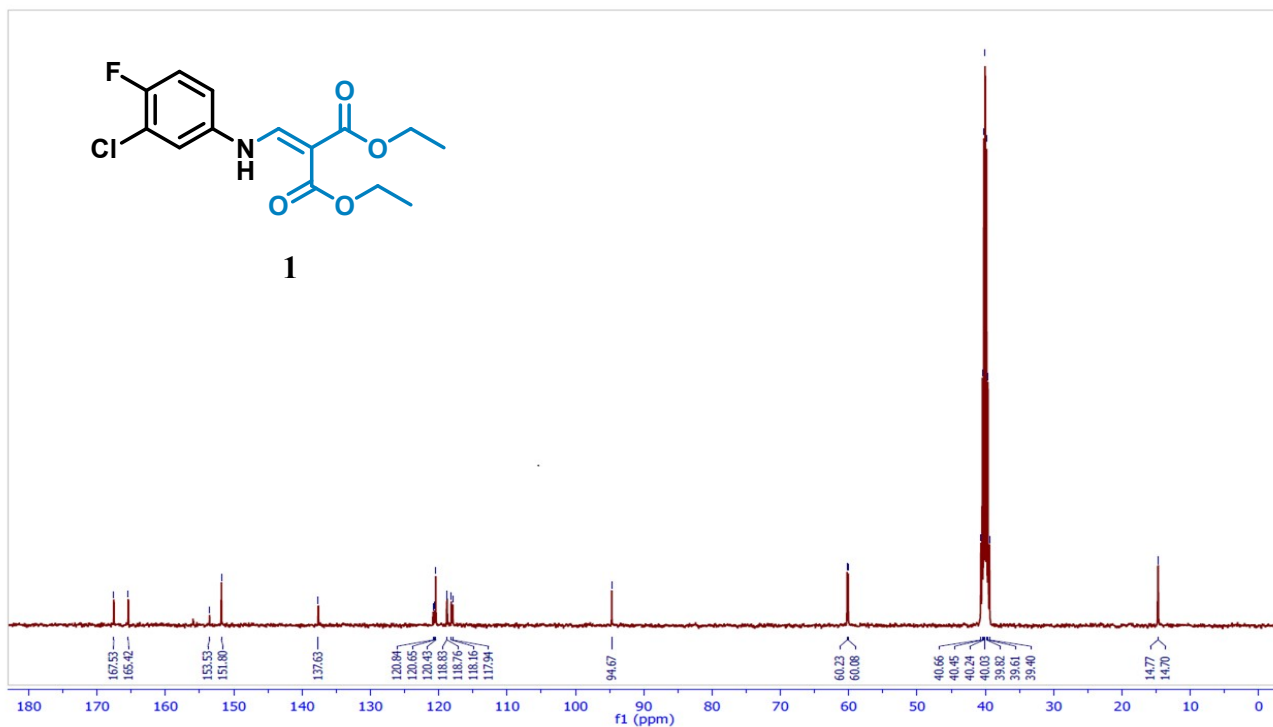

<sup>1</sup>H-NMR spectrum of compound **3**

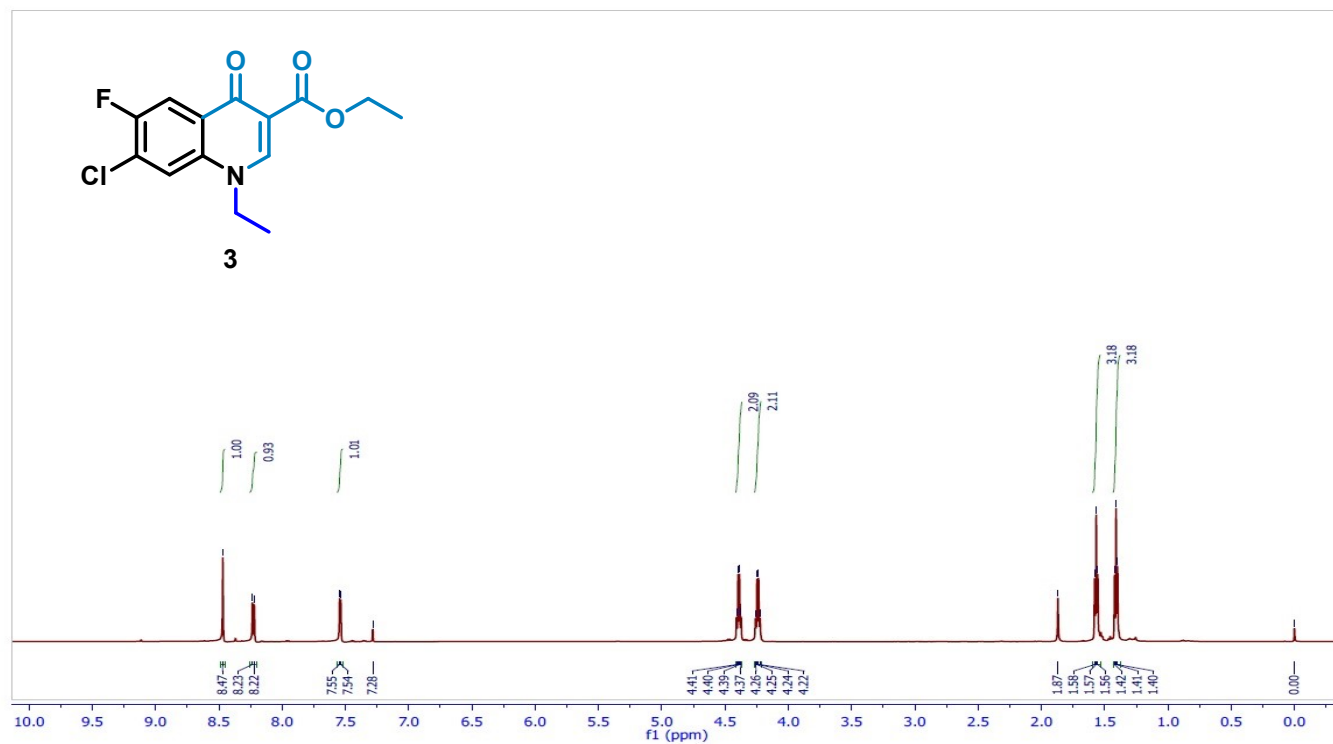

<sup>13</sup>C-NMR spectrum of compound **3**

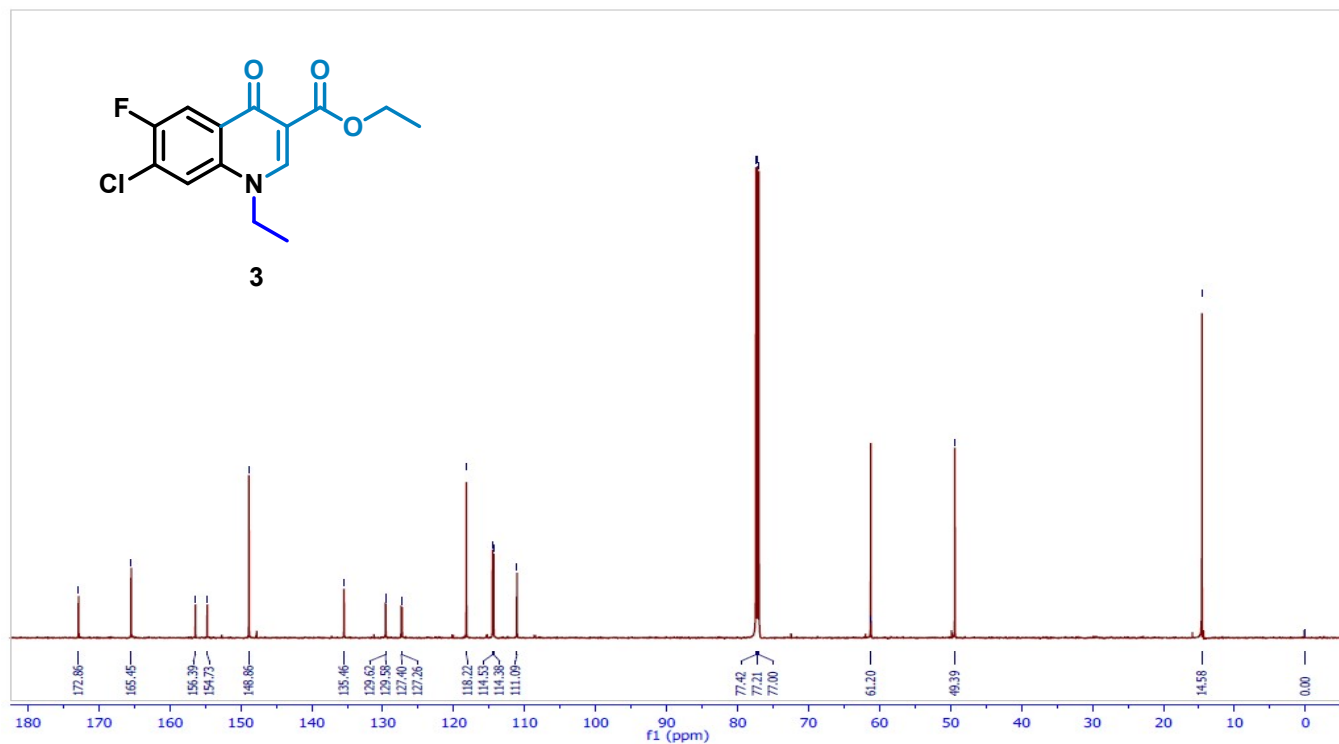

<sup>1</sup>H-NMR spectrum of compound 4

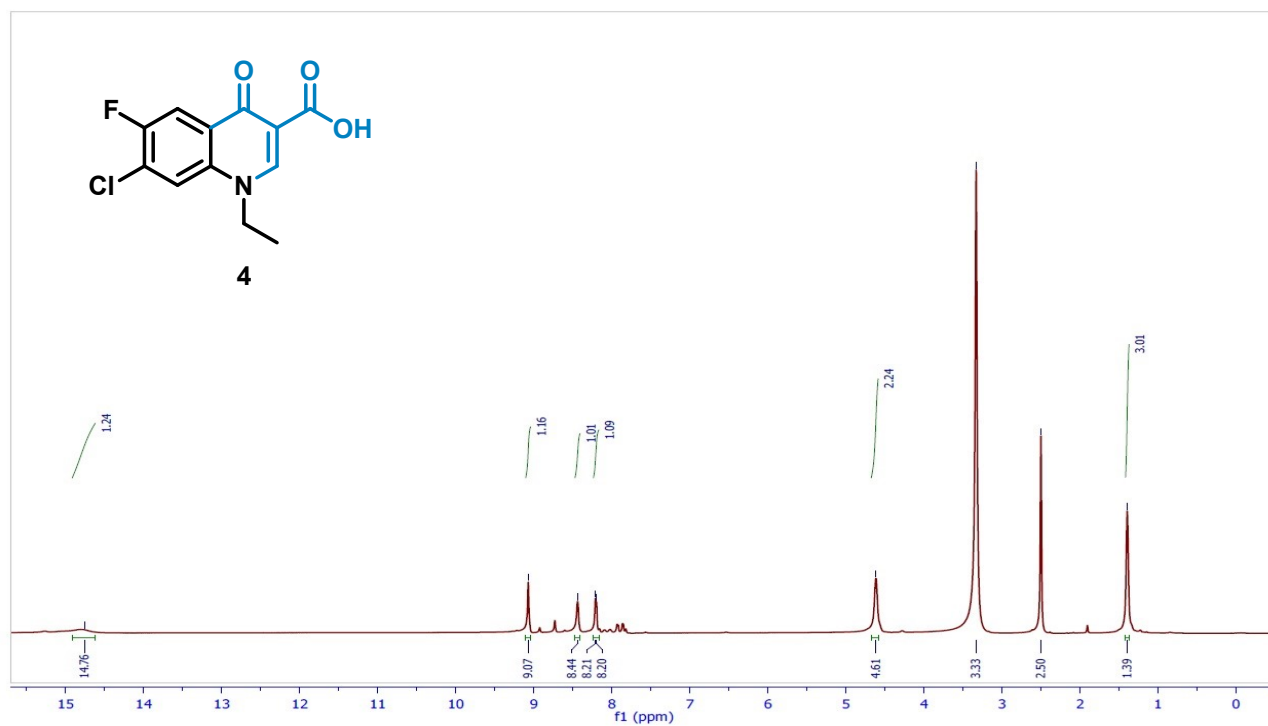

<sup>13</sup>C-NMR spectrum of compound 4

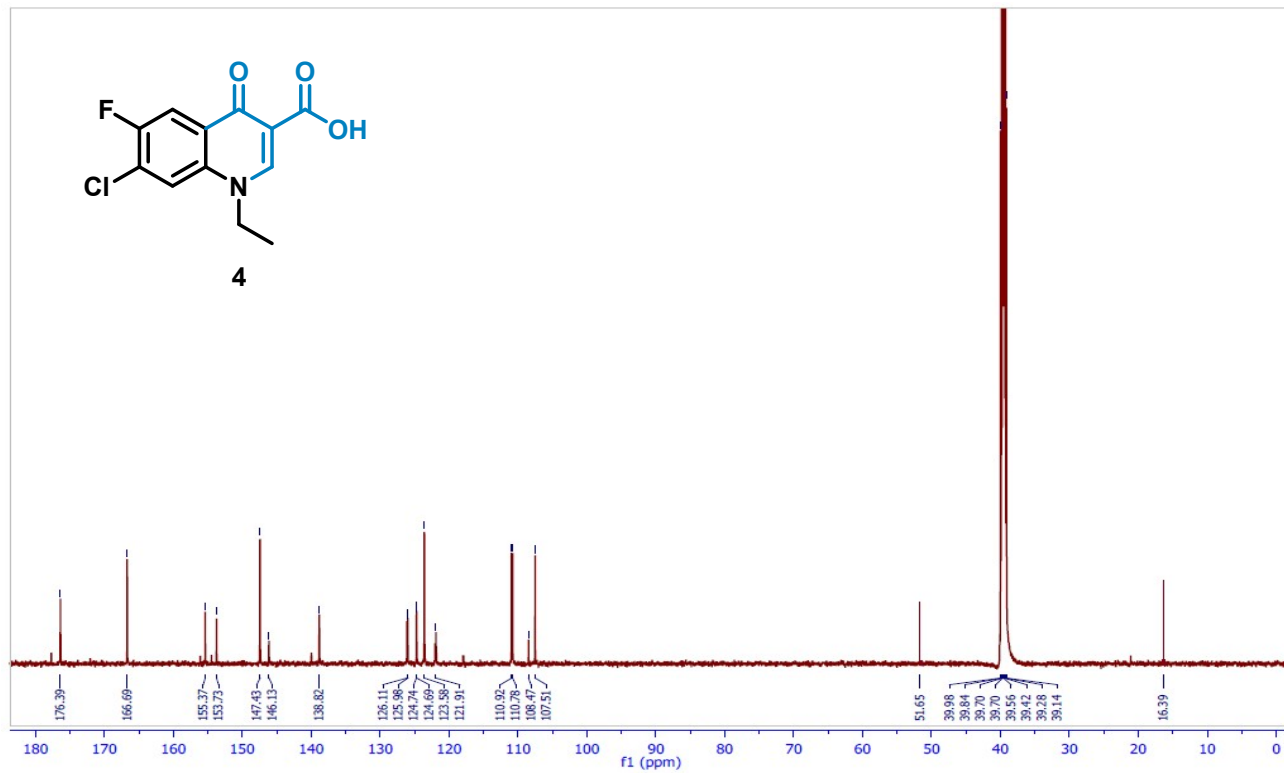

<sup>1</sup>H-NMR spectrum of compound 5

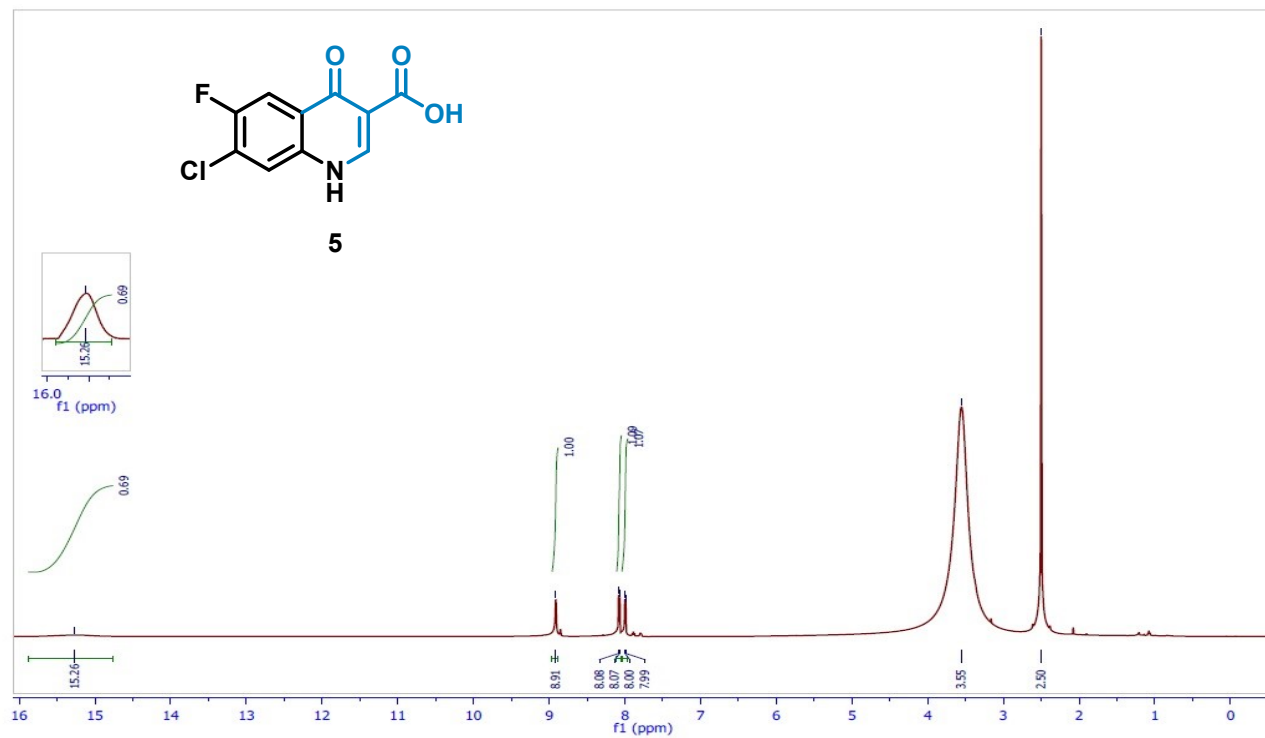

<sup>13</sup>C-NMR spectrum of compound 5

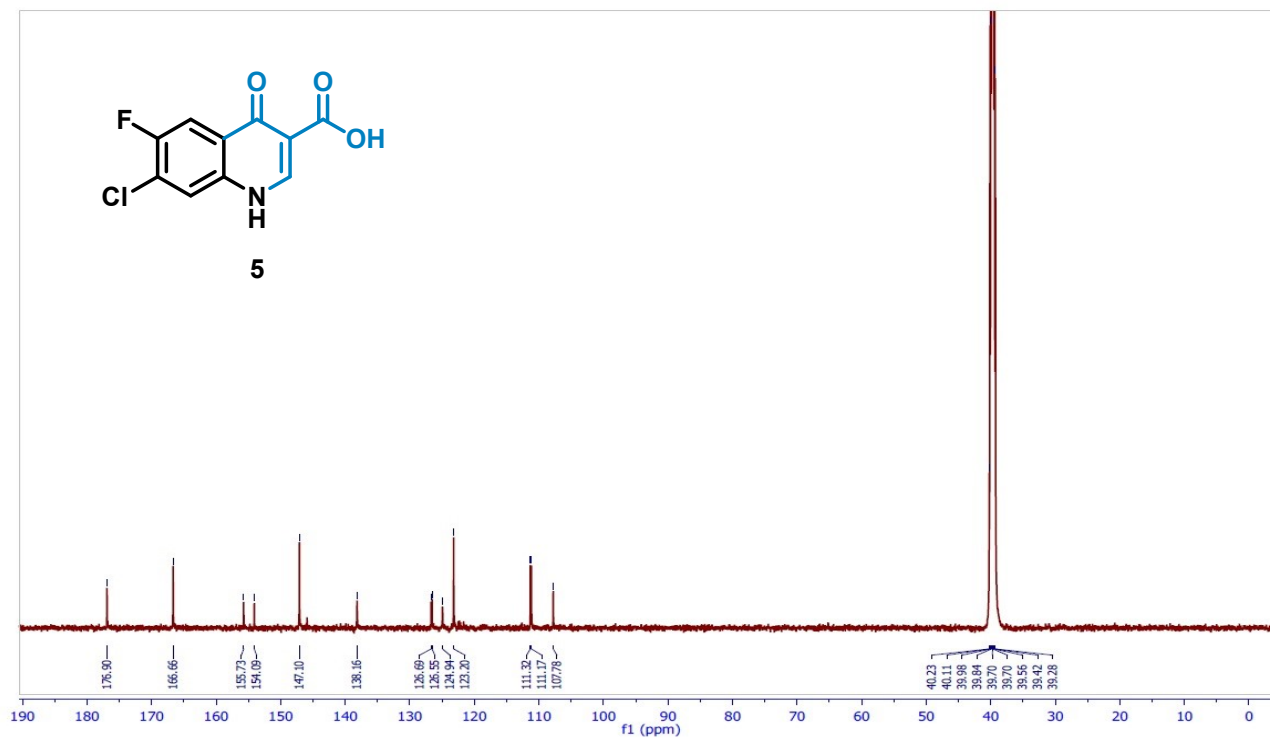

S4

<sup>1</sup>H-NMR spectrum of compound 6

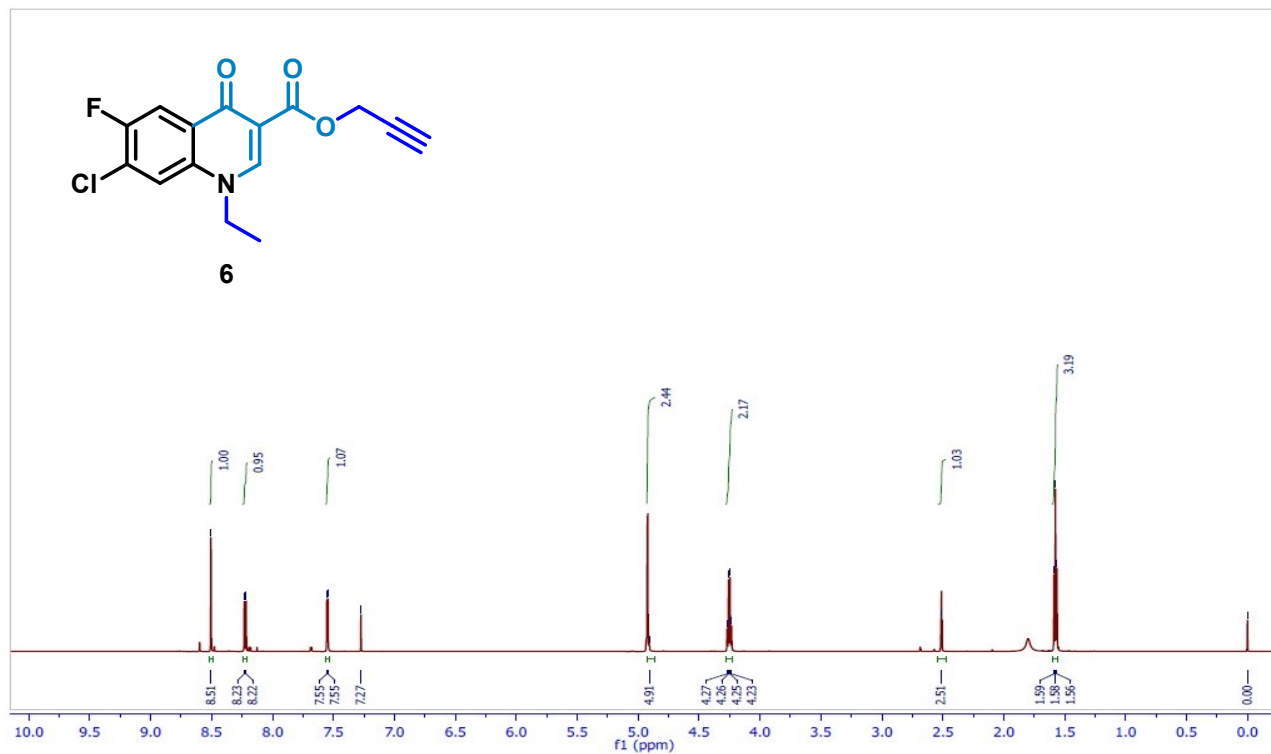

<sup>13</sup>C-NMR spectrum of compound 6

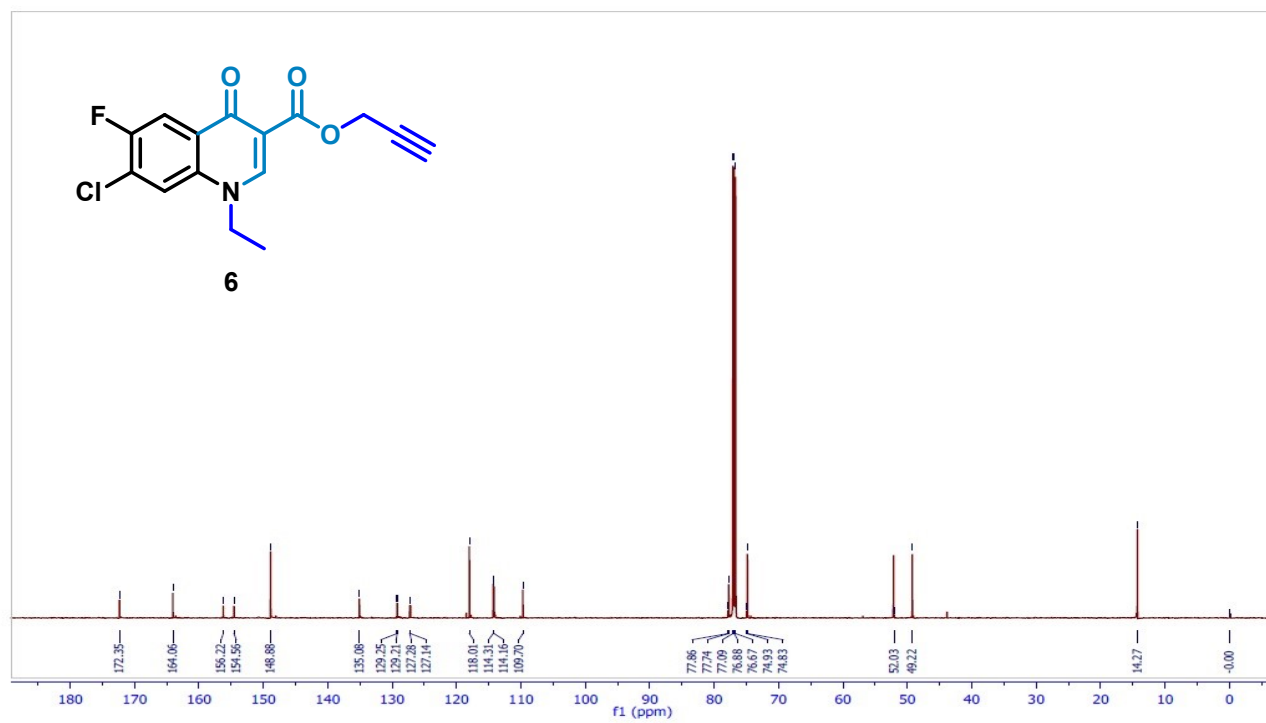

S5

<sup>1</sup>H-NMR spectrum of compound 7

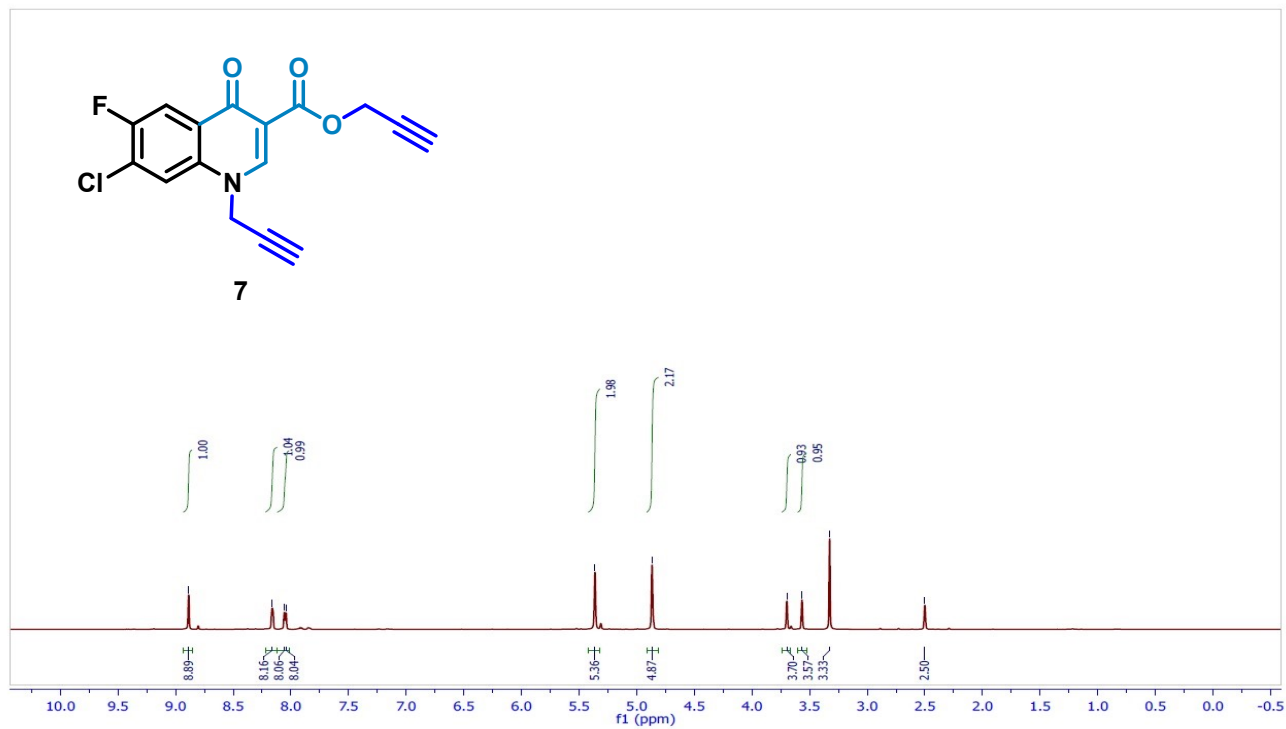

<sup>13</sup>C-NMR spectrum of compound 7

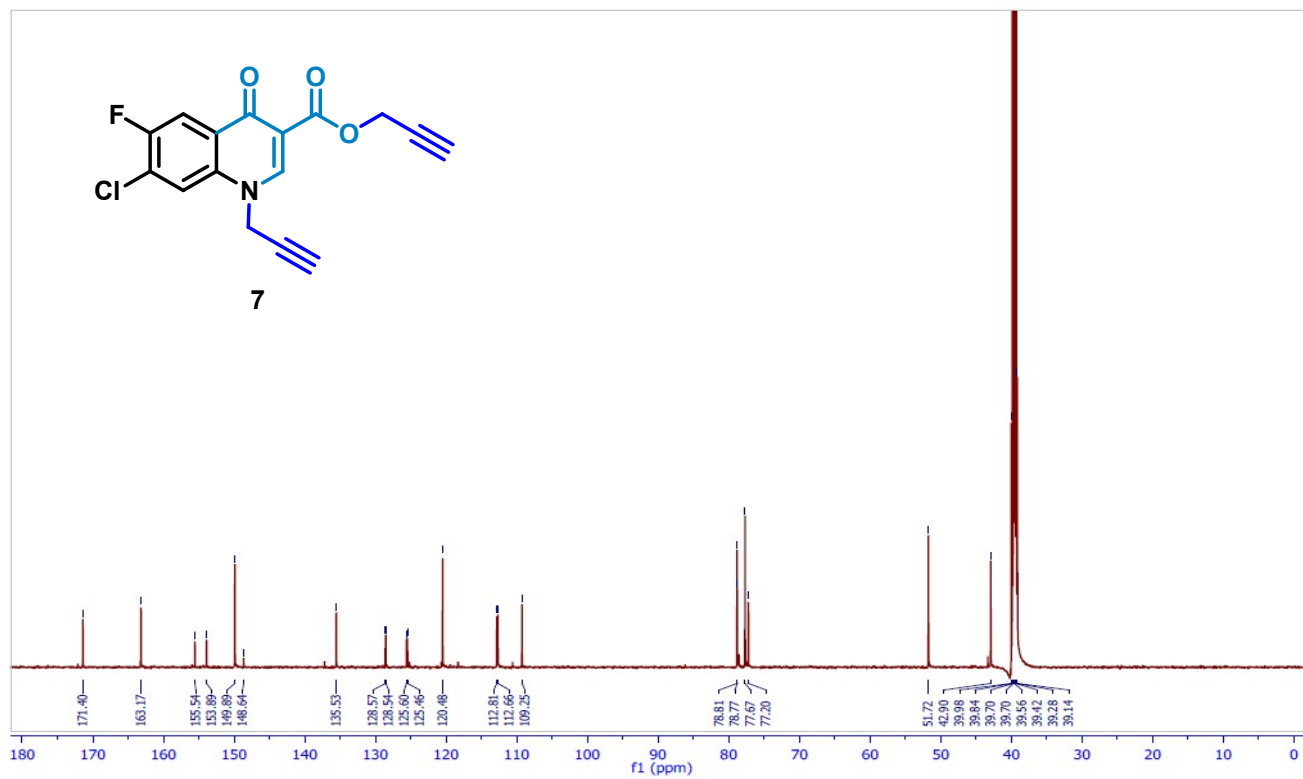



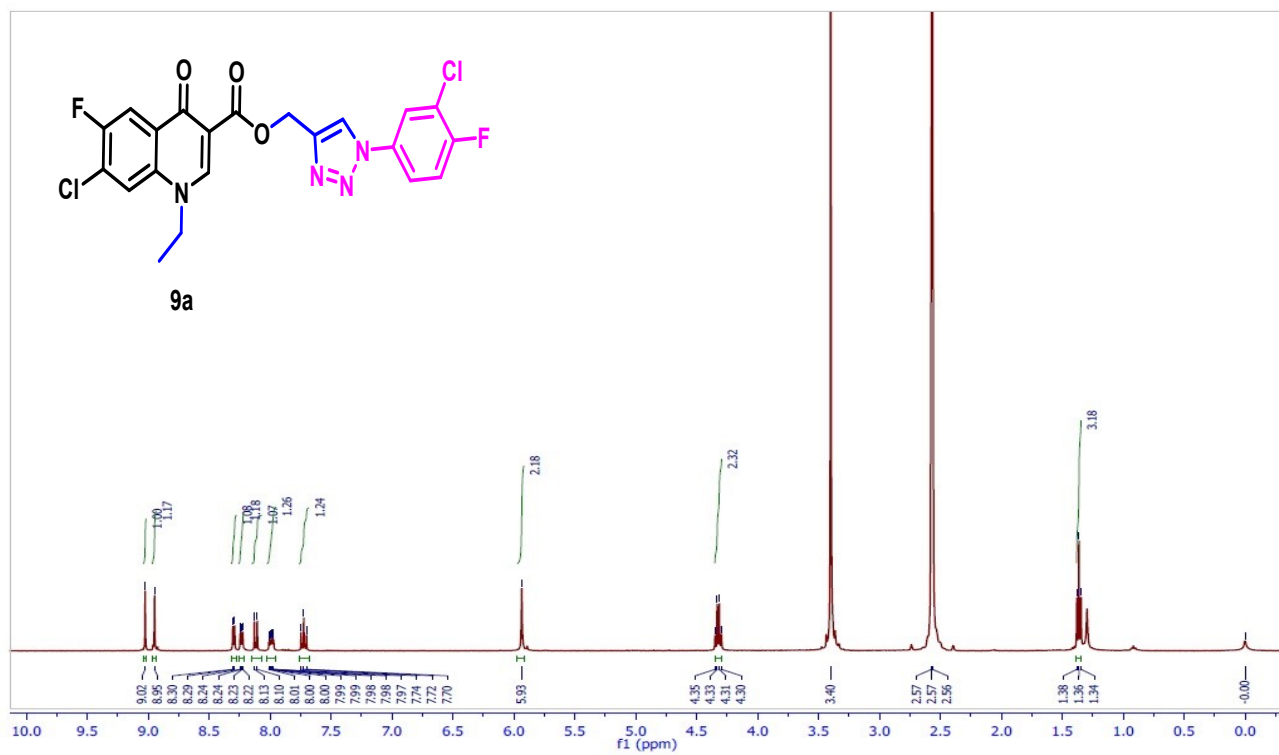

<sup>13</sup>C-NMR spectrum of compound **9a**

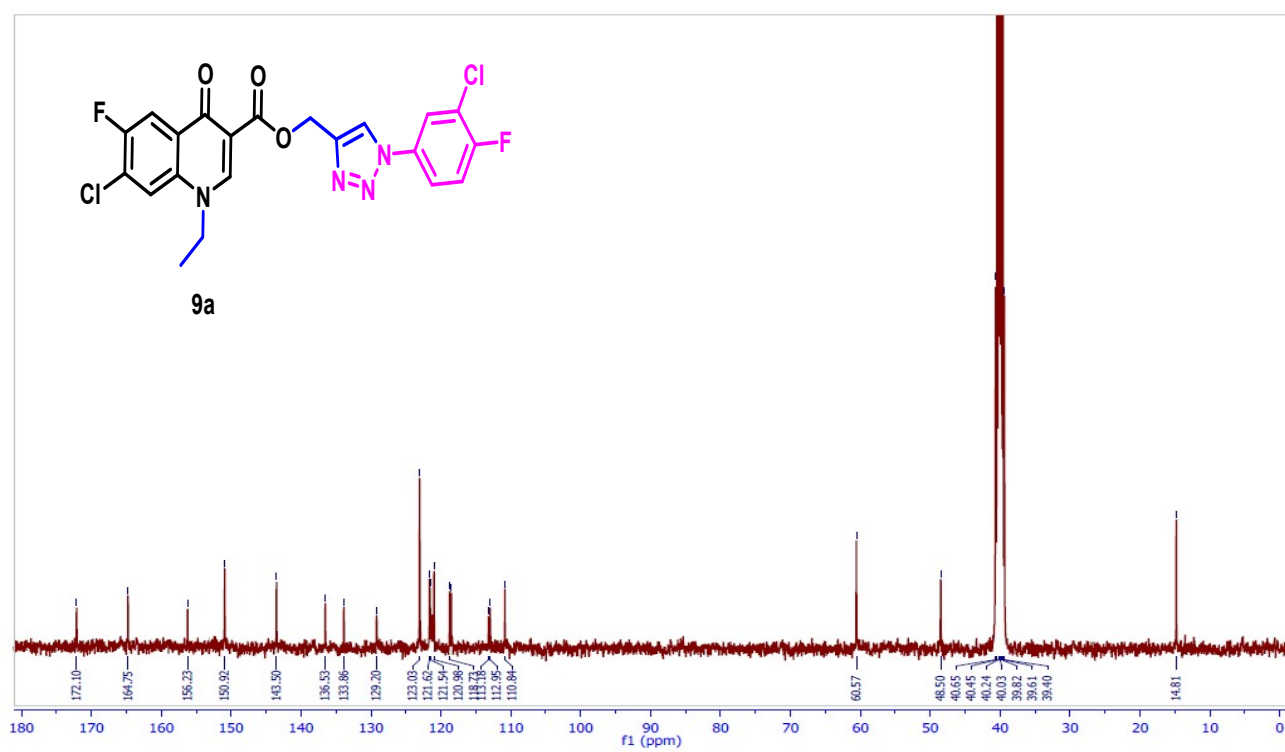

<sup>1</sup>H-NMR spectrum of compound **9b**

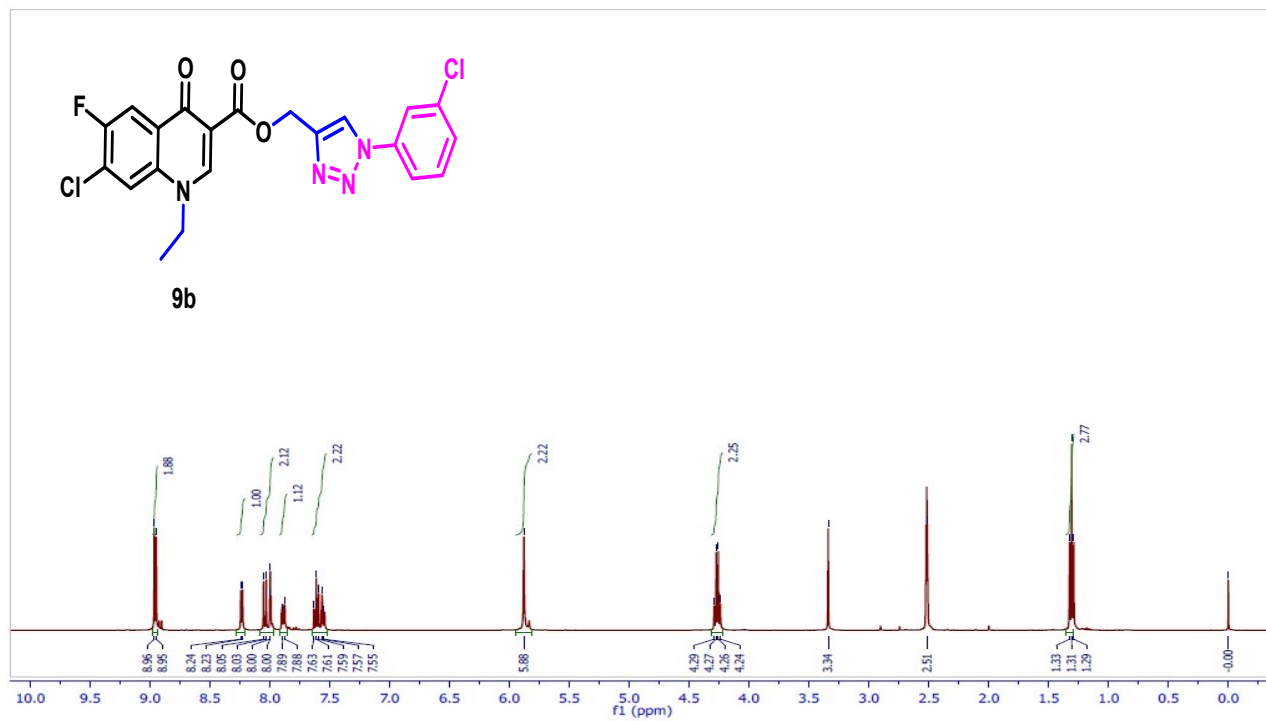

<sup>13</sup>C-NMR spectrum of compound **9b**

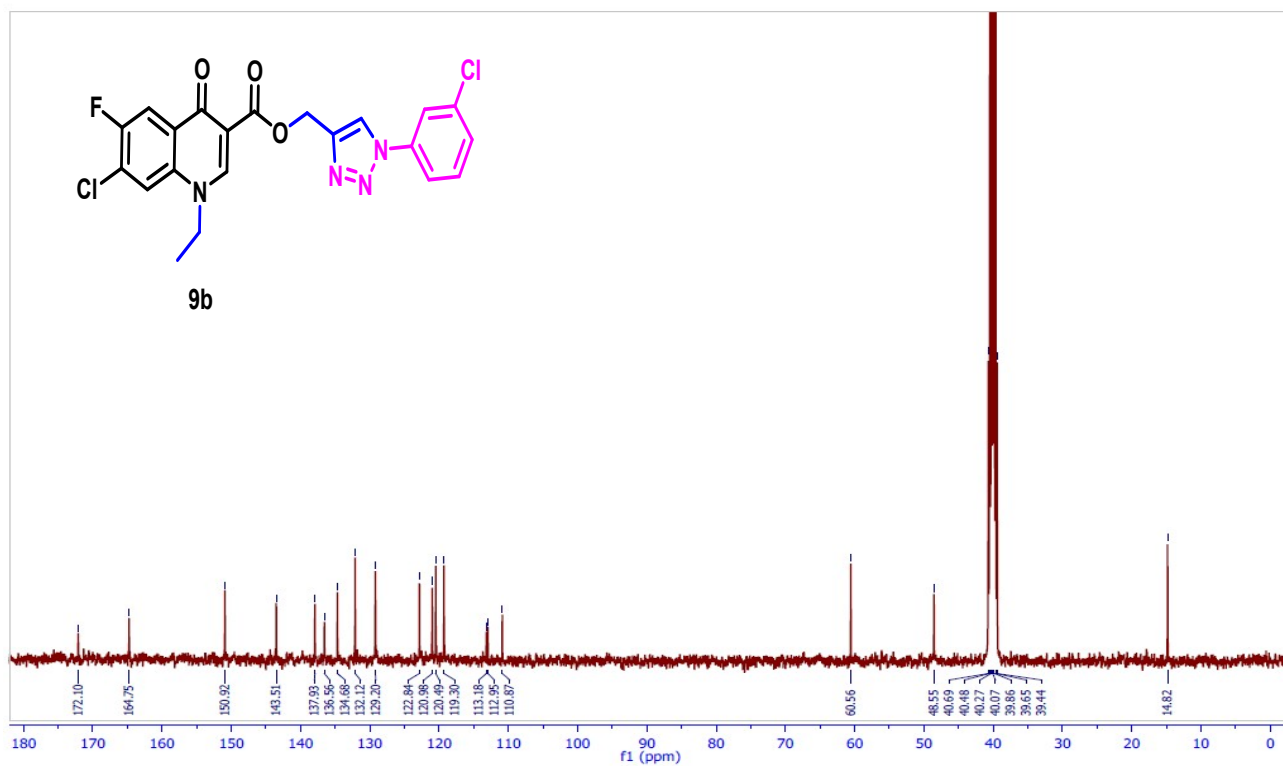

S8

Figure S9c. <sup>1</sup>H-NMR spectrum of compound **9c**

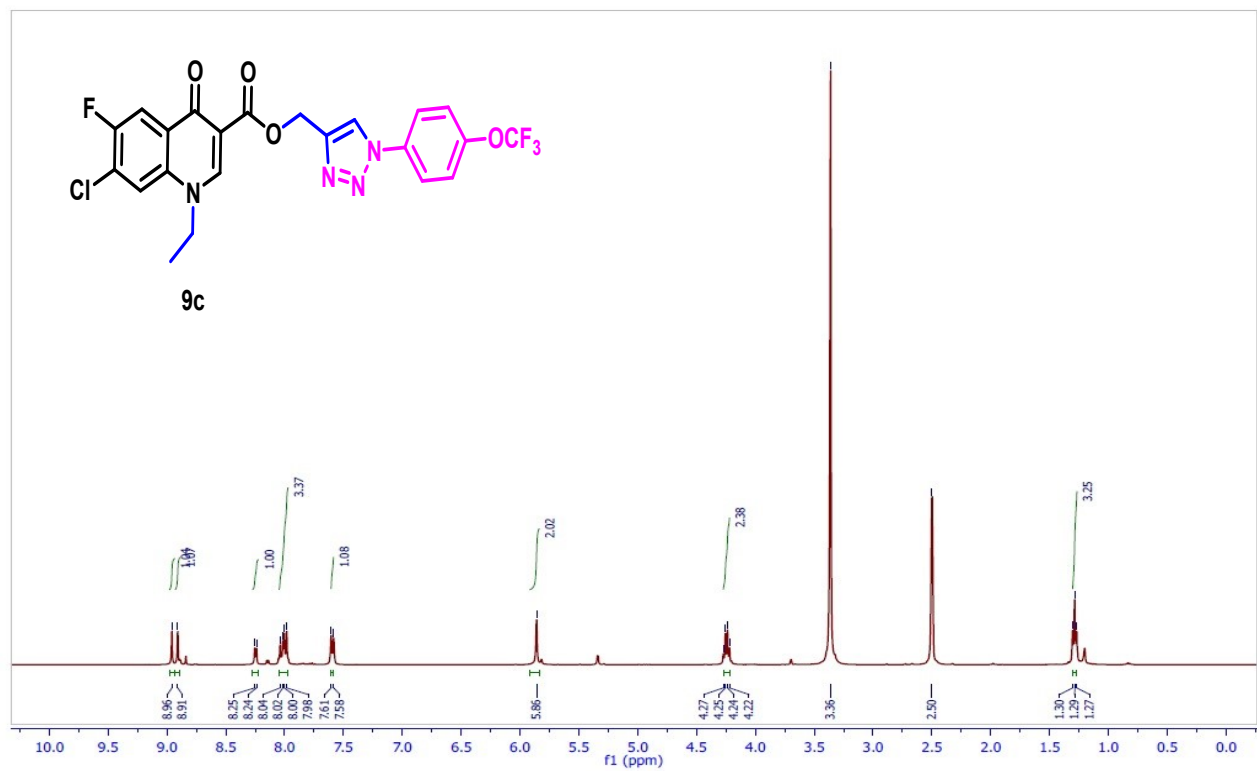

<sup>13</sup>C-NMR spectrum of compound **9c**

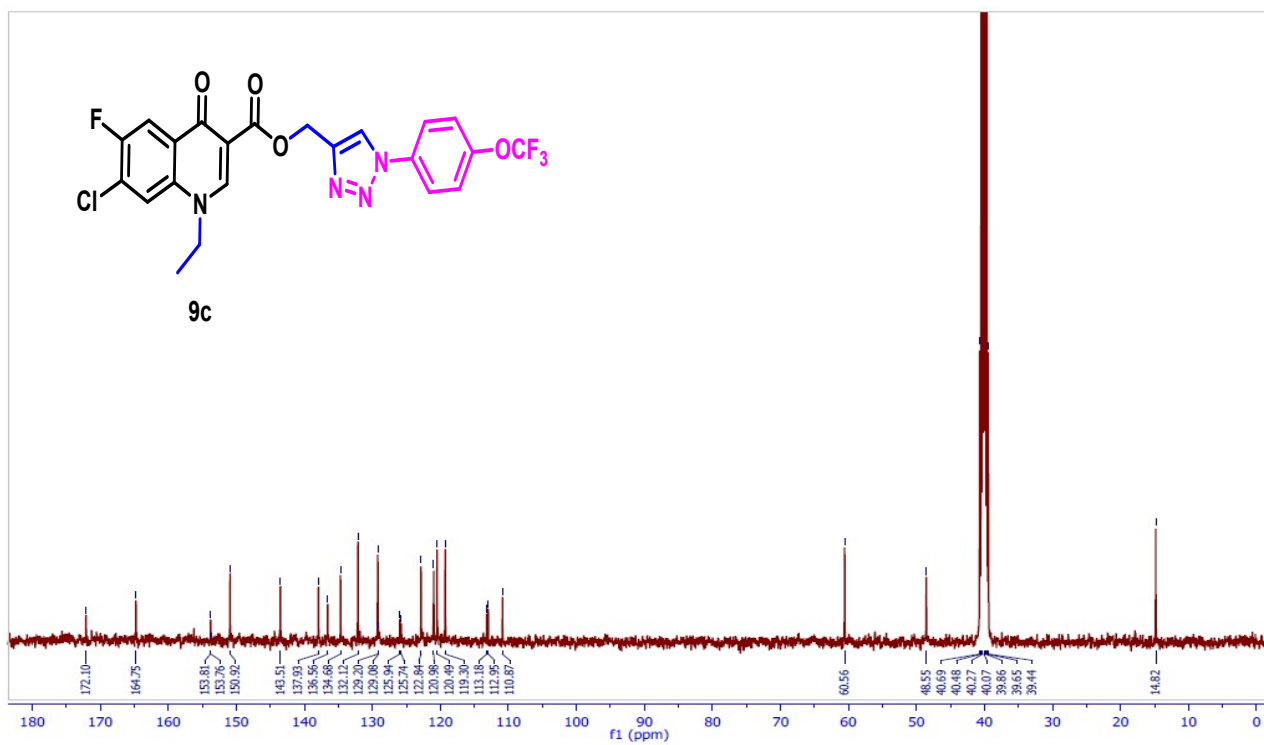

S9

<sup>1</sup>H-NMR spectrum of compound **9d**

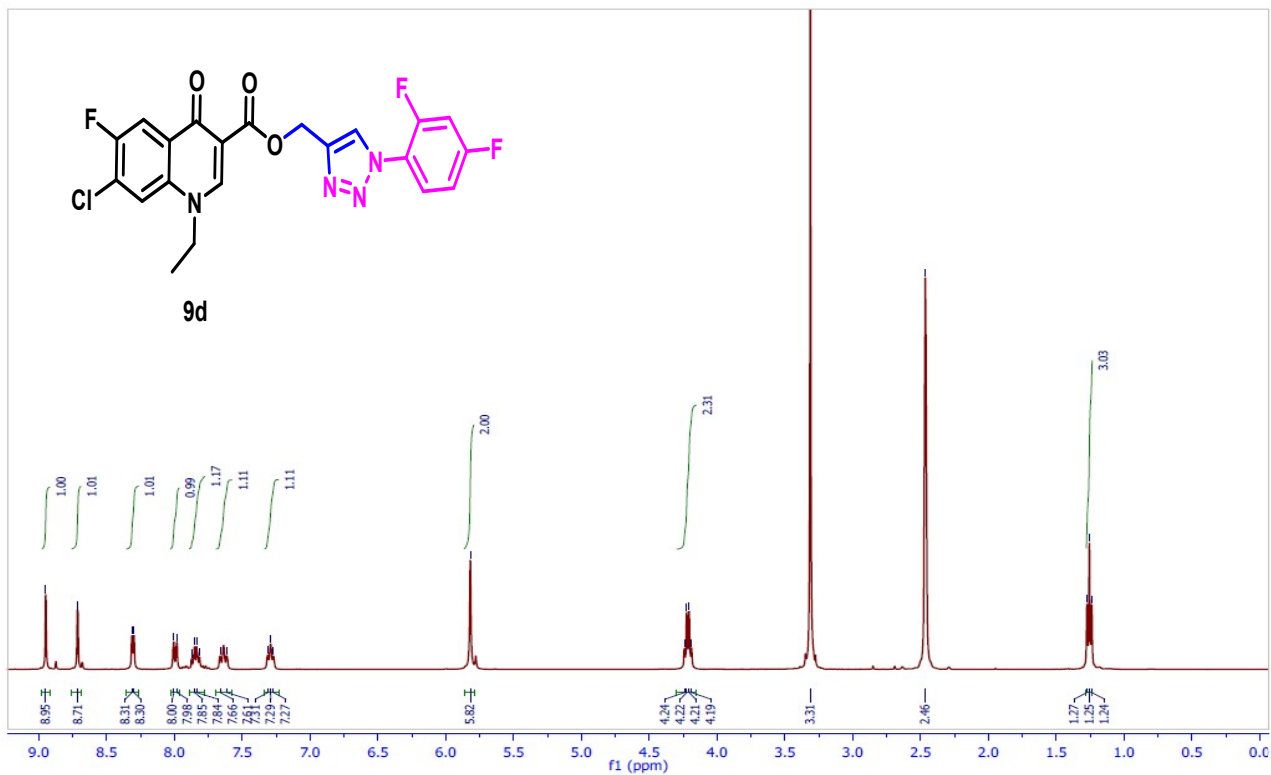

<sup>13</sup>C-NMR spectrum of compound **9d**

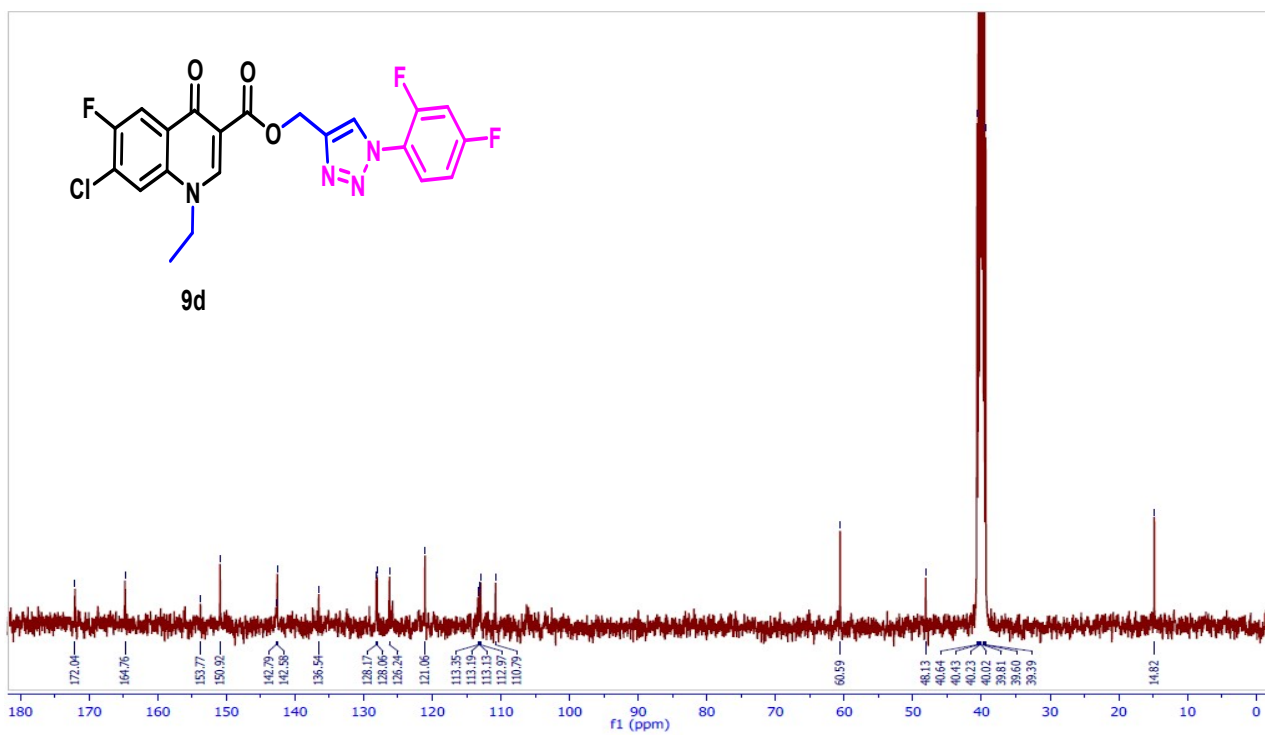

S10

<sup>1</sup>H-NMR spectrum of compound **9e**

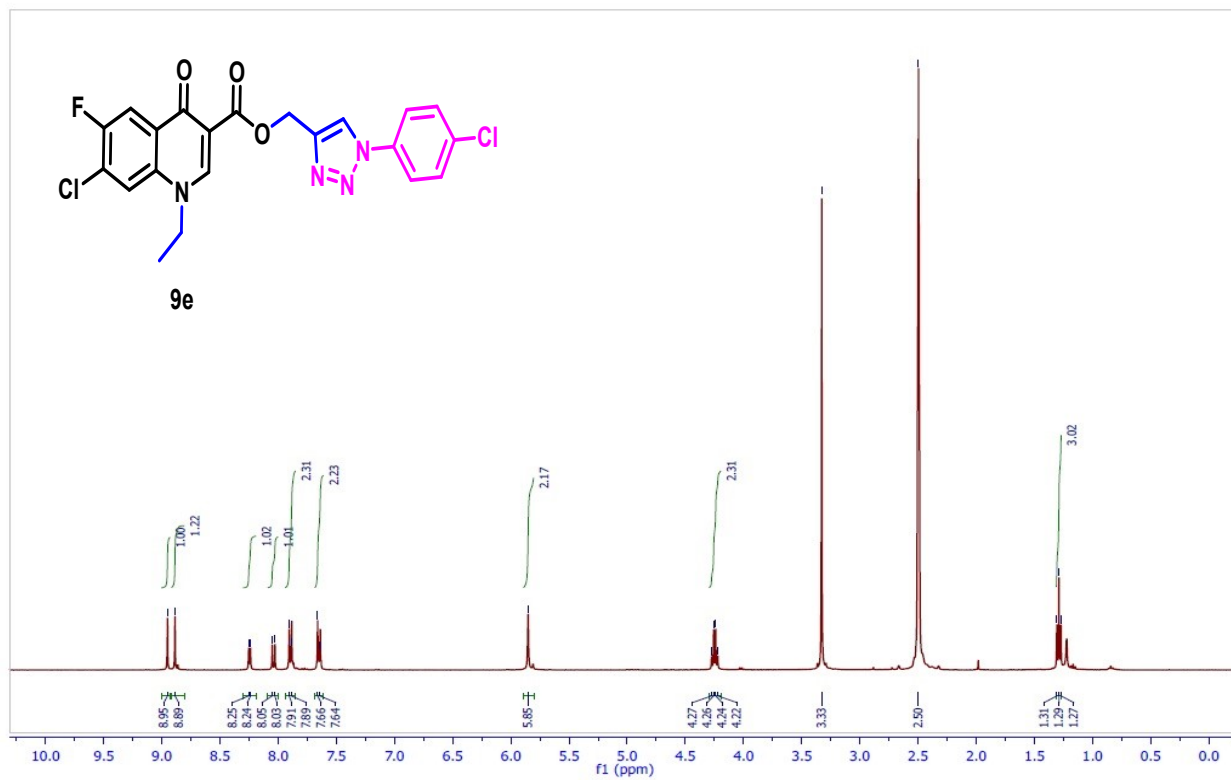

<sup>13</sup>C-NMR spectrum of compound 9e

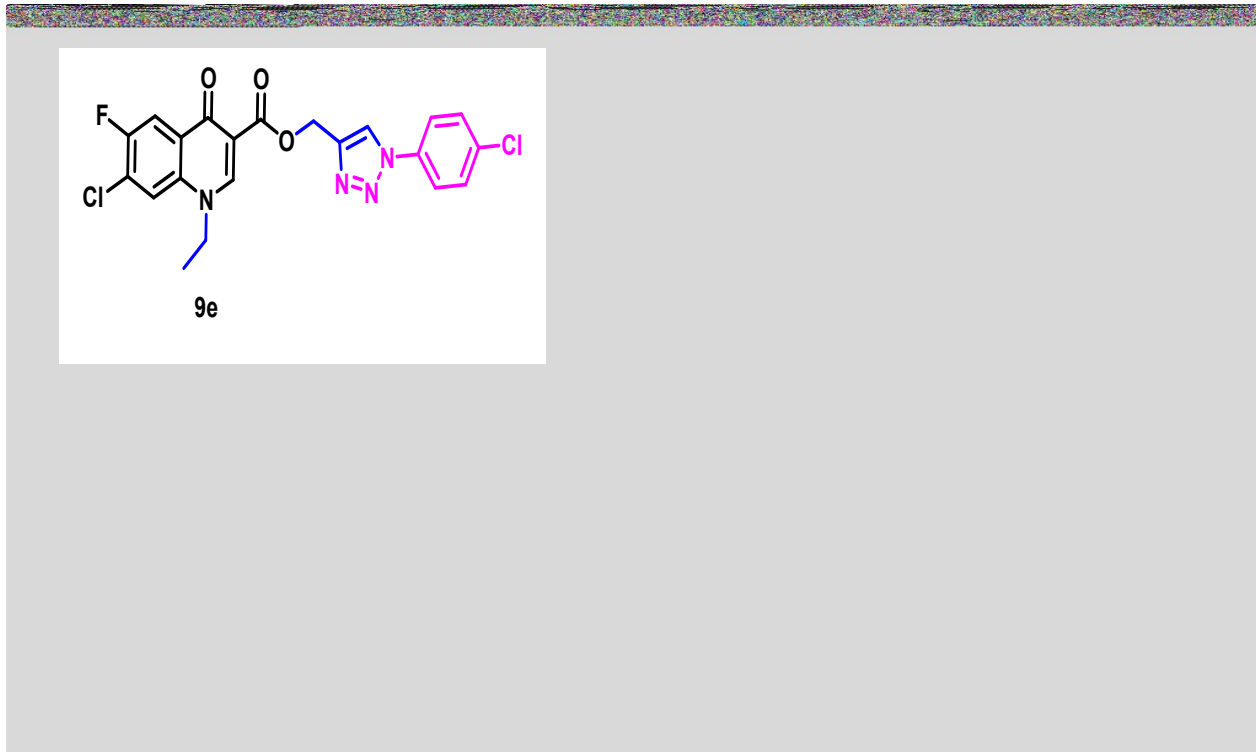

S11

<sup>1</sup>H-NMR spectrum of compound 9f

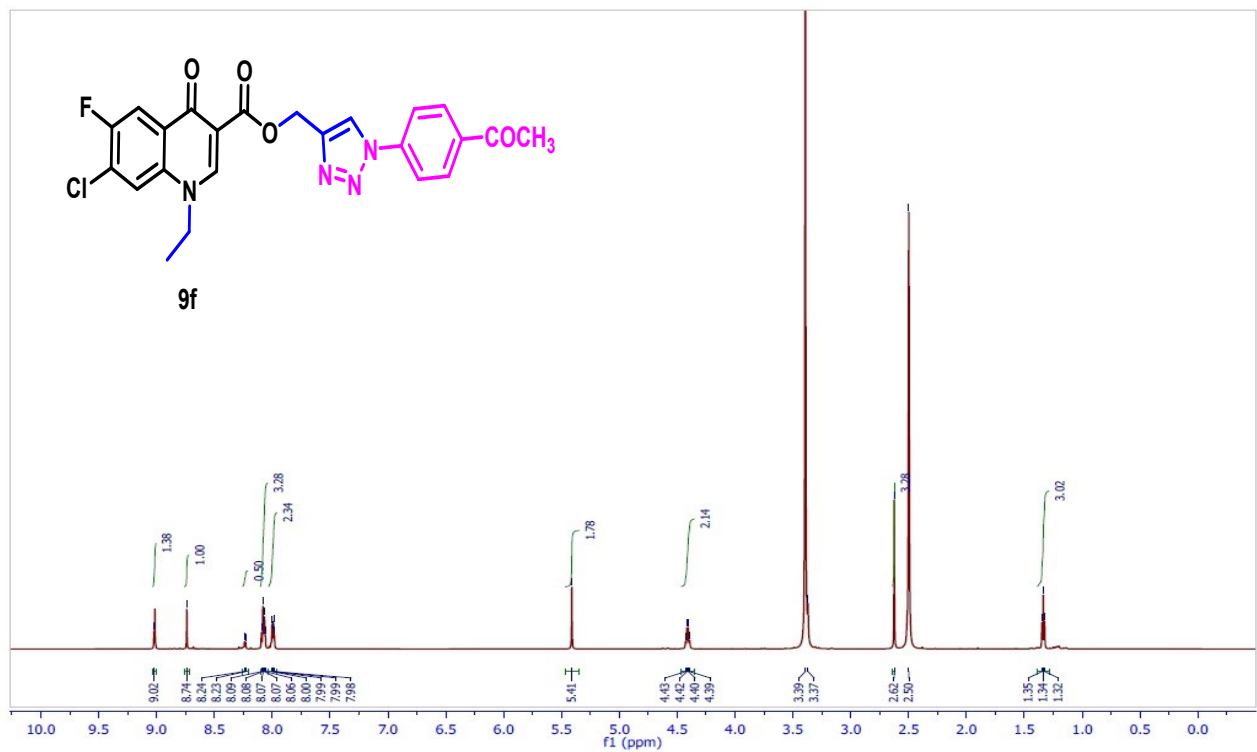

<sup>13</sup>C-NMR spectrum of compound 9f

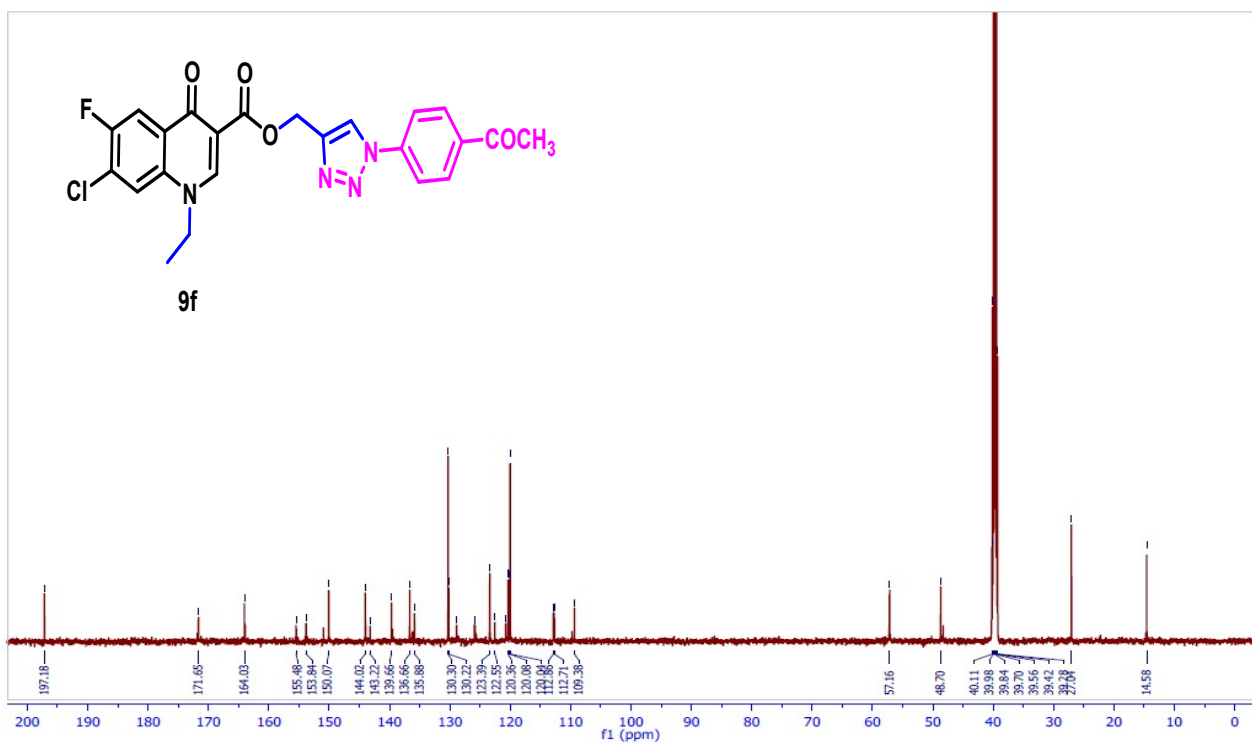

S12

<sup>1</sup>H-NMR spectrum of compound 9g

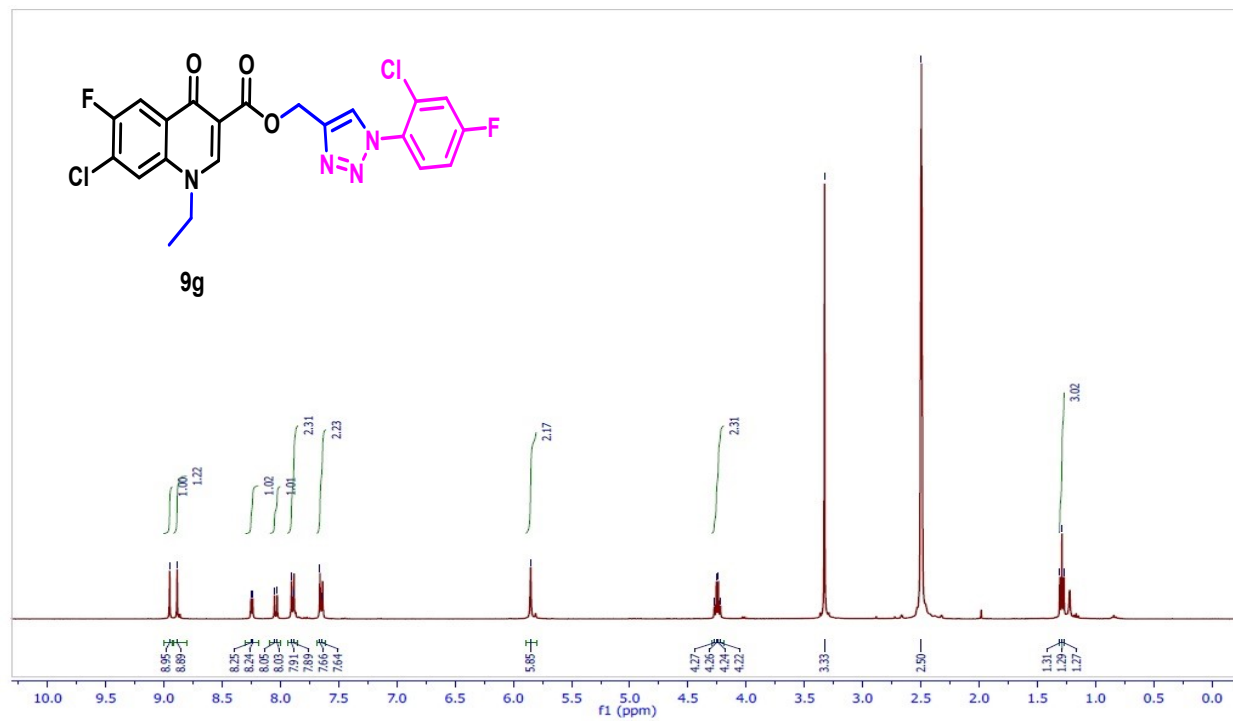

<sup>13</sup>C-NMR spectrum of compound 9g

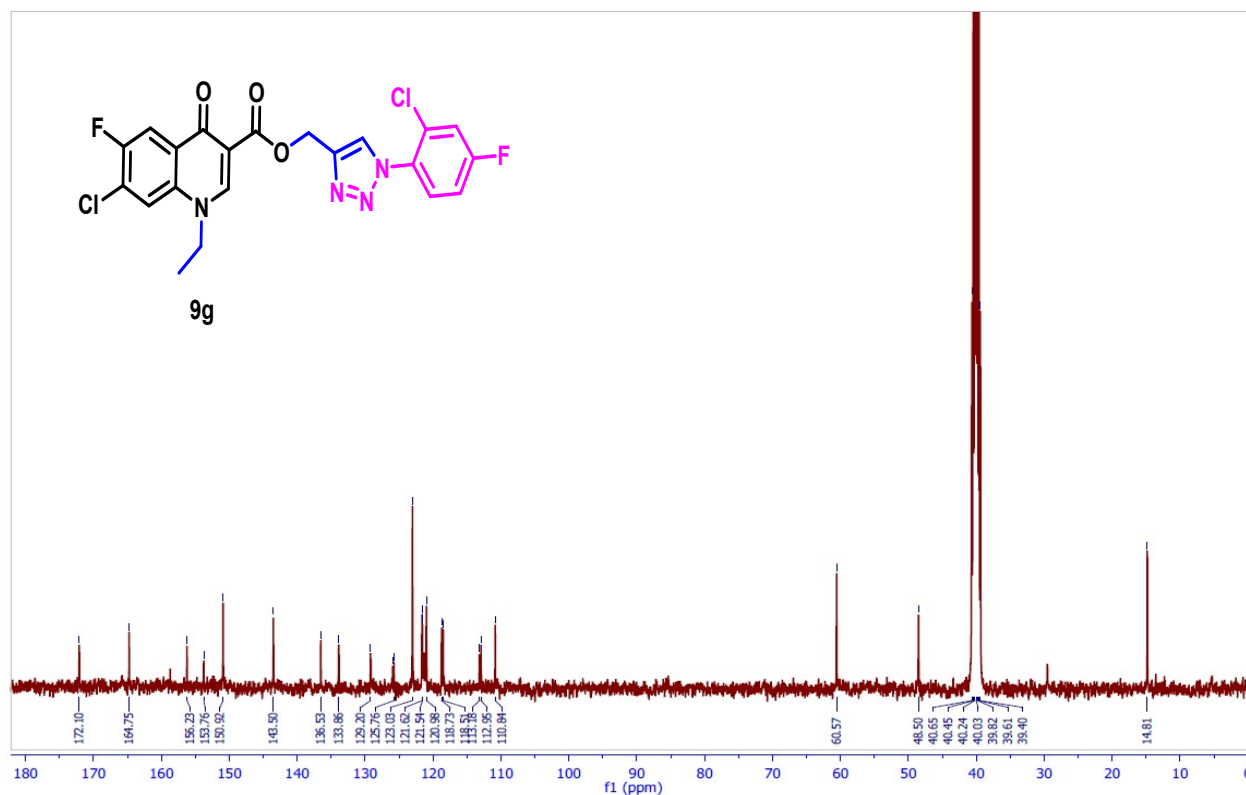

<sup>1</sup>H-NMR spectrum of compound **9h**

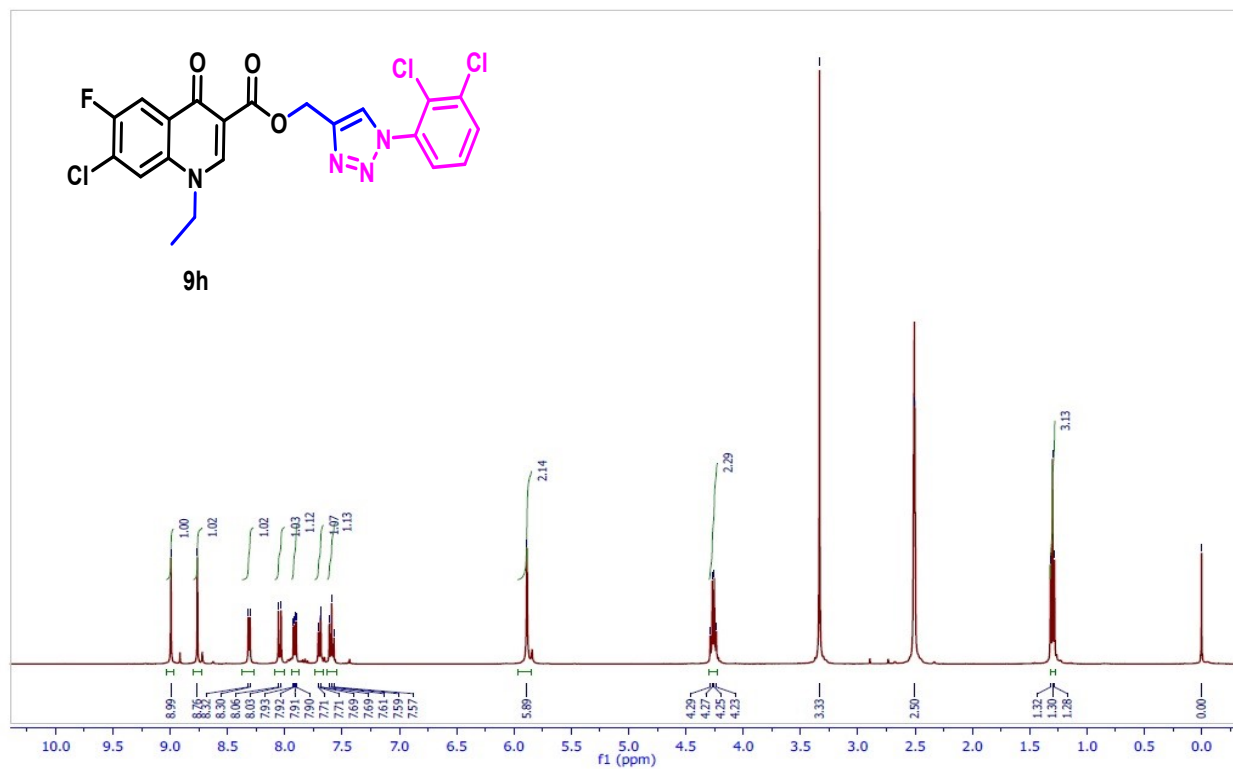

<sup>13</sup>C-NMR spectrum of compound **9h**

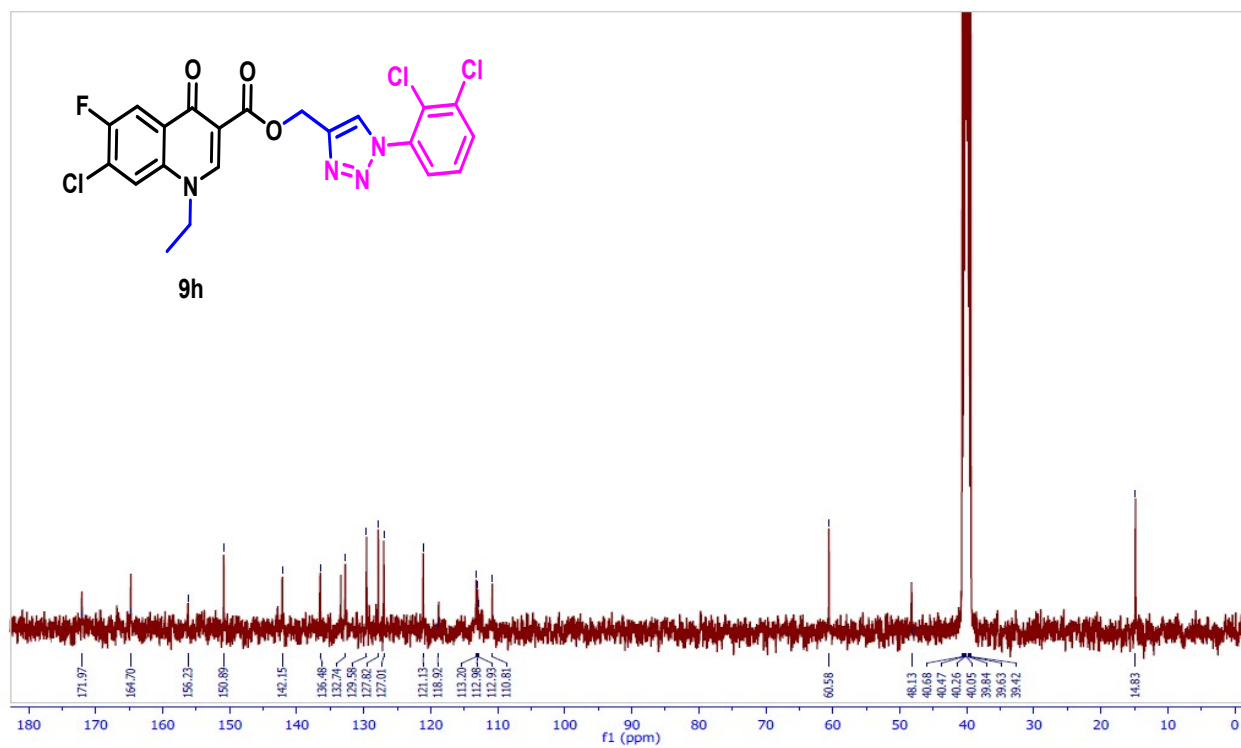



<sup>1</sup>H-NMR spectrum of compound **9i**

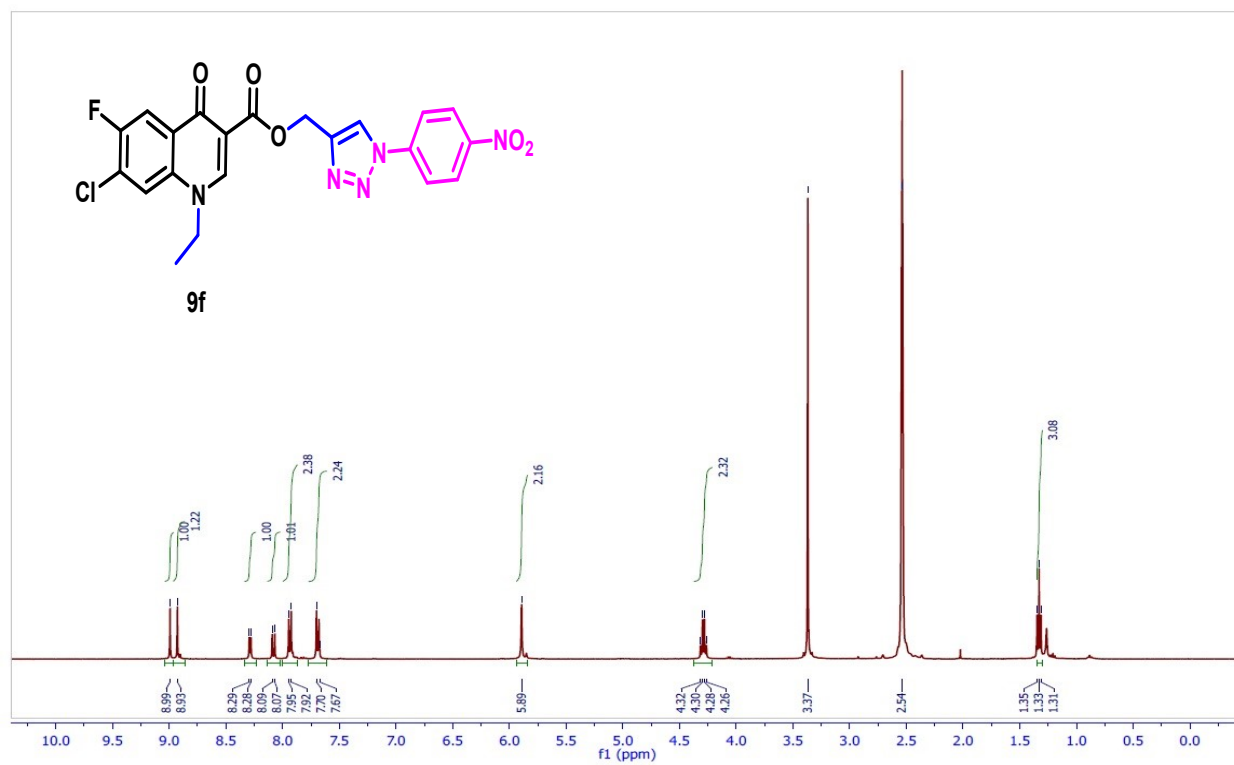

<sup>13</sup>C-NMR spectrum of compound **9i**

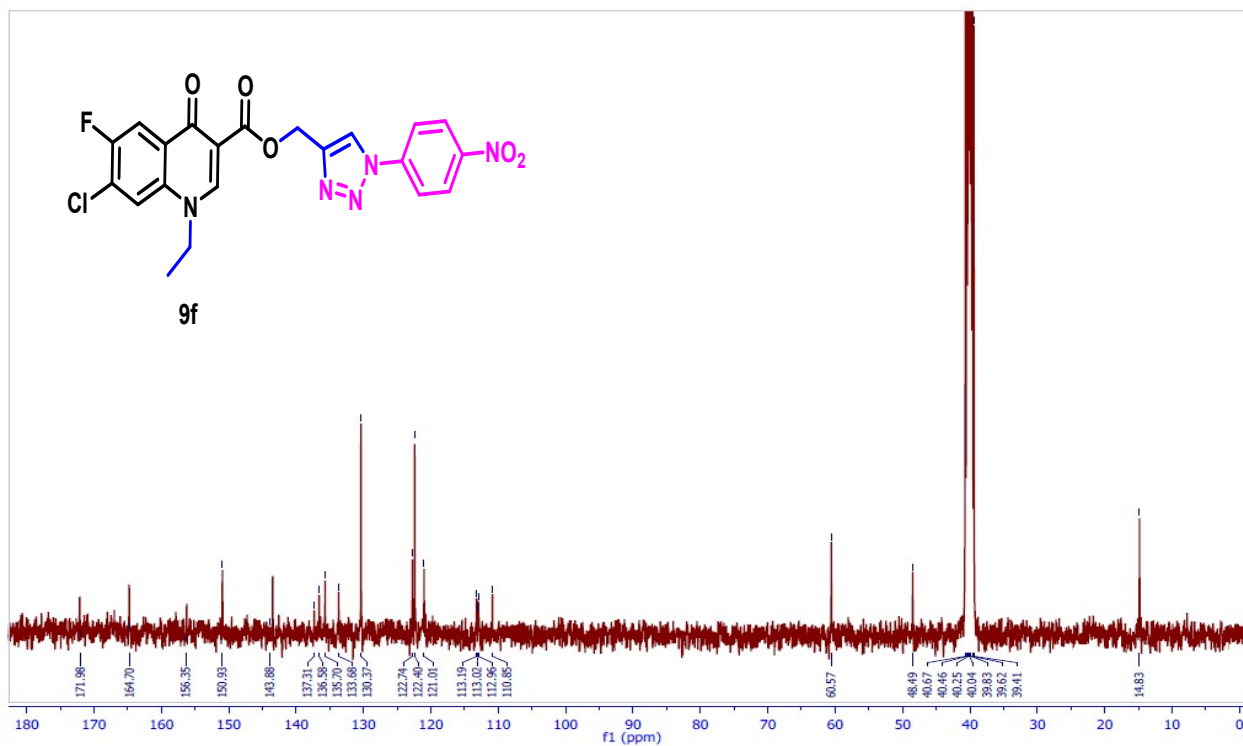

<sup>1</sup>H-NMR spectrum of compound **10a**

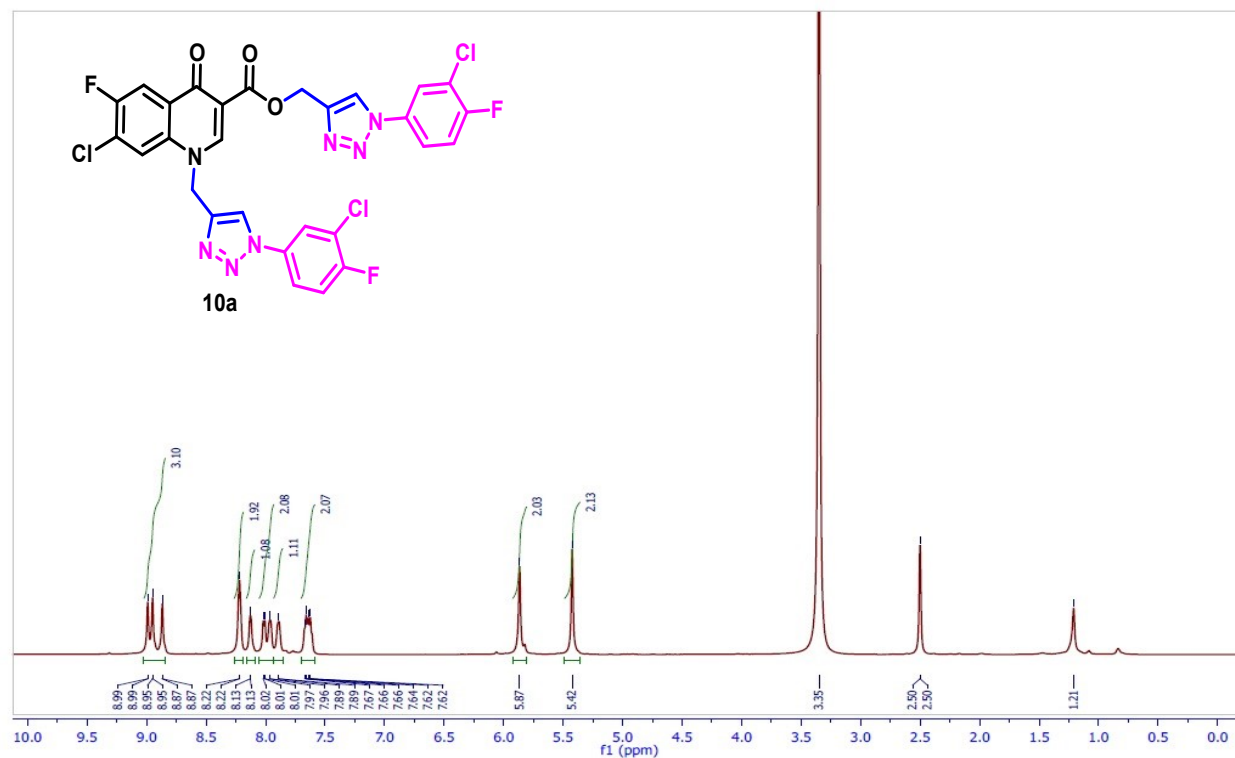

<sup>13</sup>C-NMR spectrum of compound **10a**

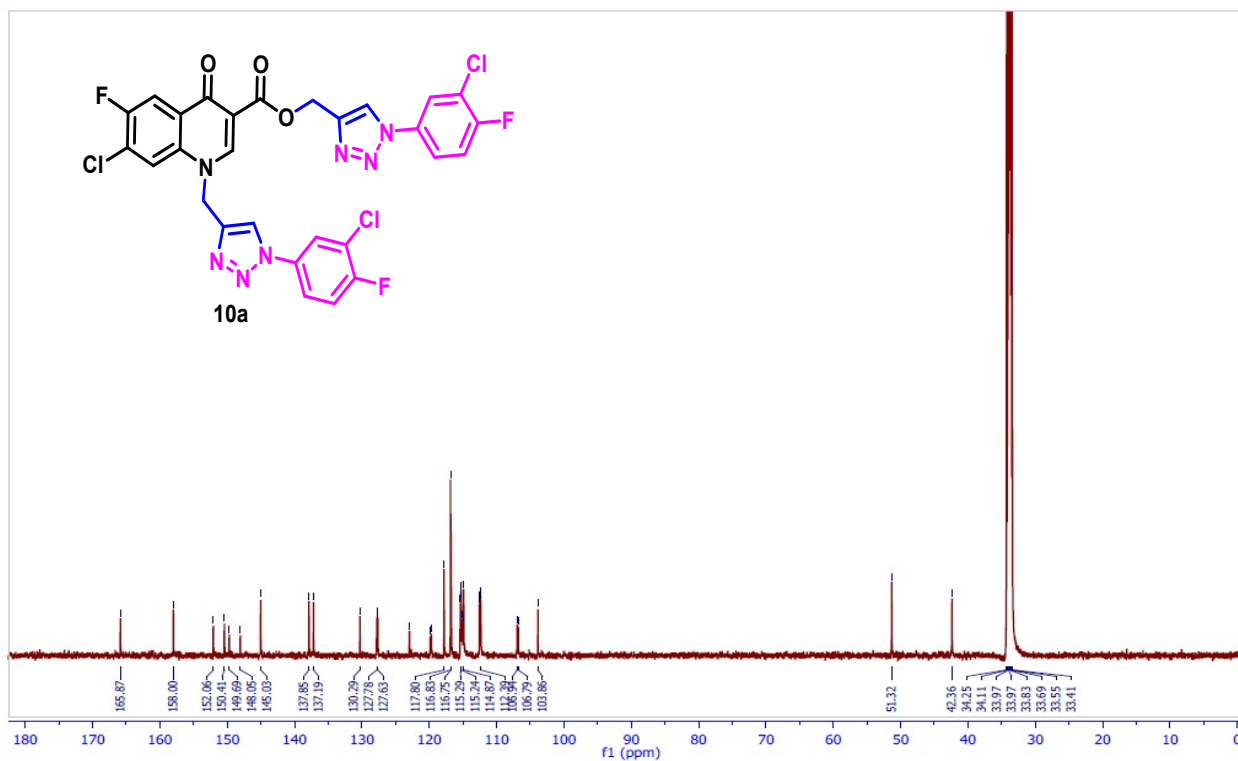

<sup>1</sup>H-NMR spectrum of compound **10b**

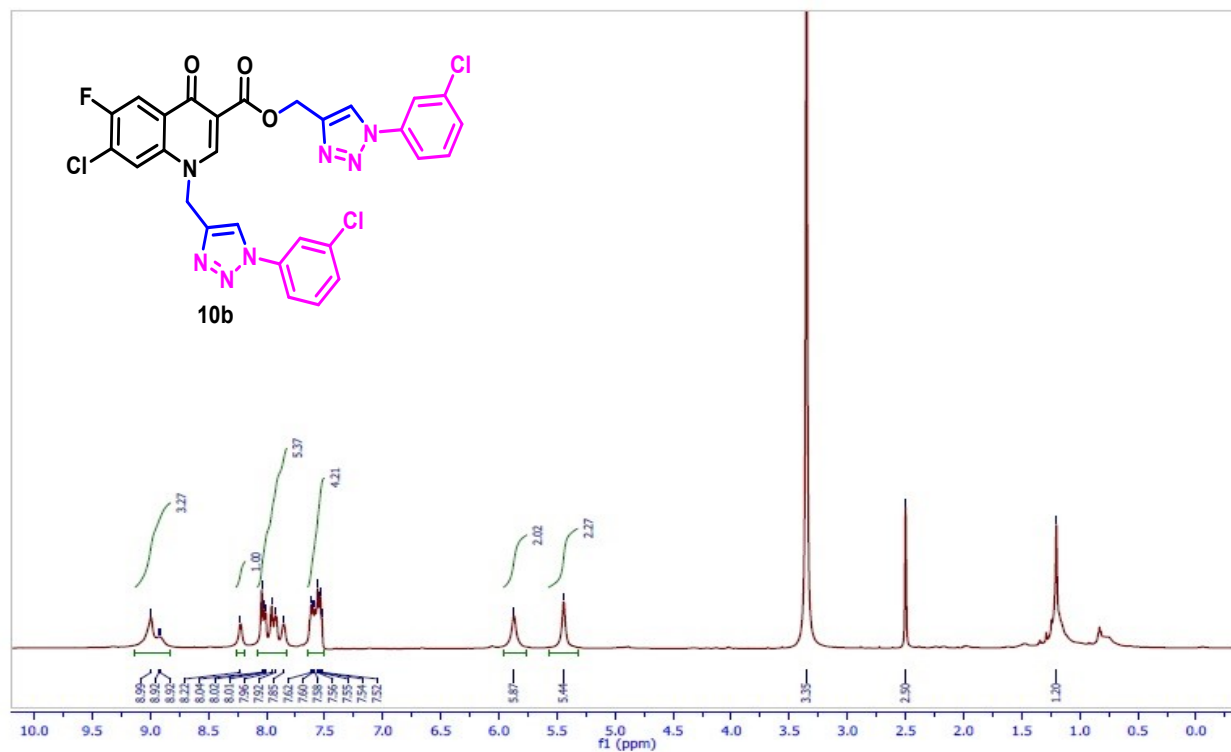

<sup>13</sup>C-NMR spectrum of compound **10b**

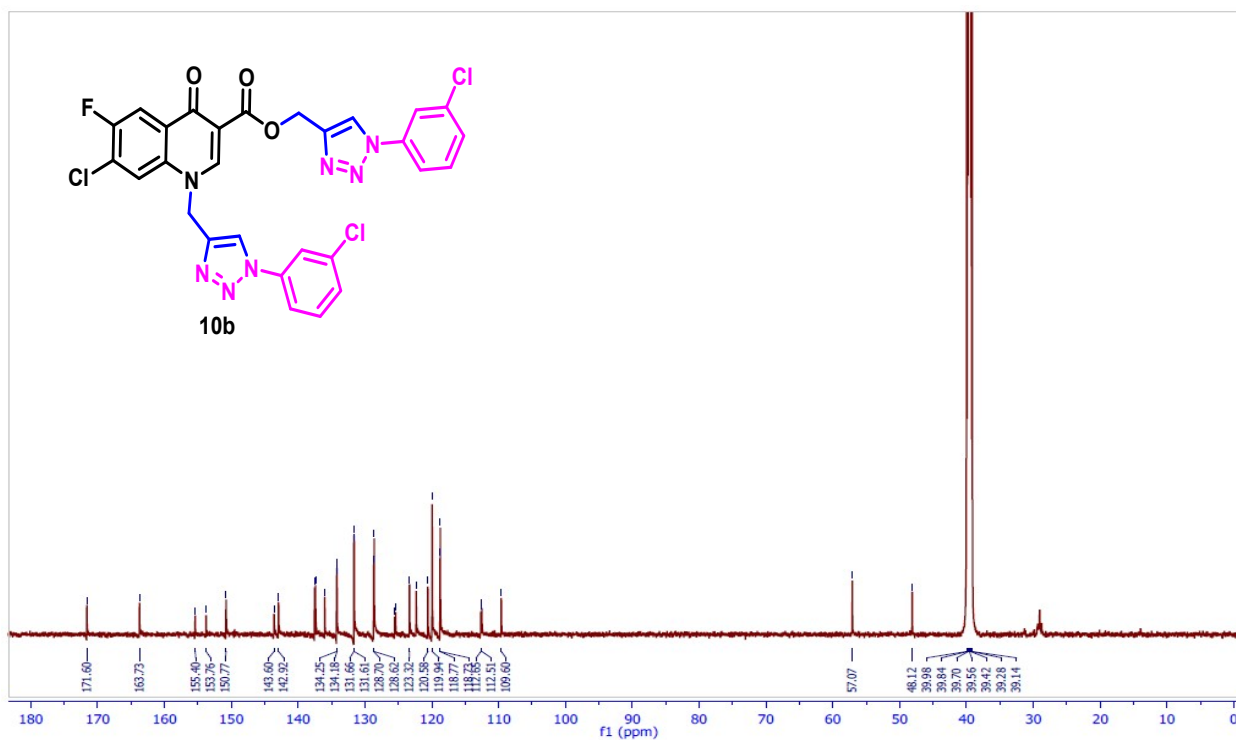

<sup>1</sup>H-NMR spectrum of compound **10c**

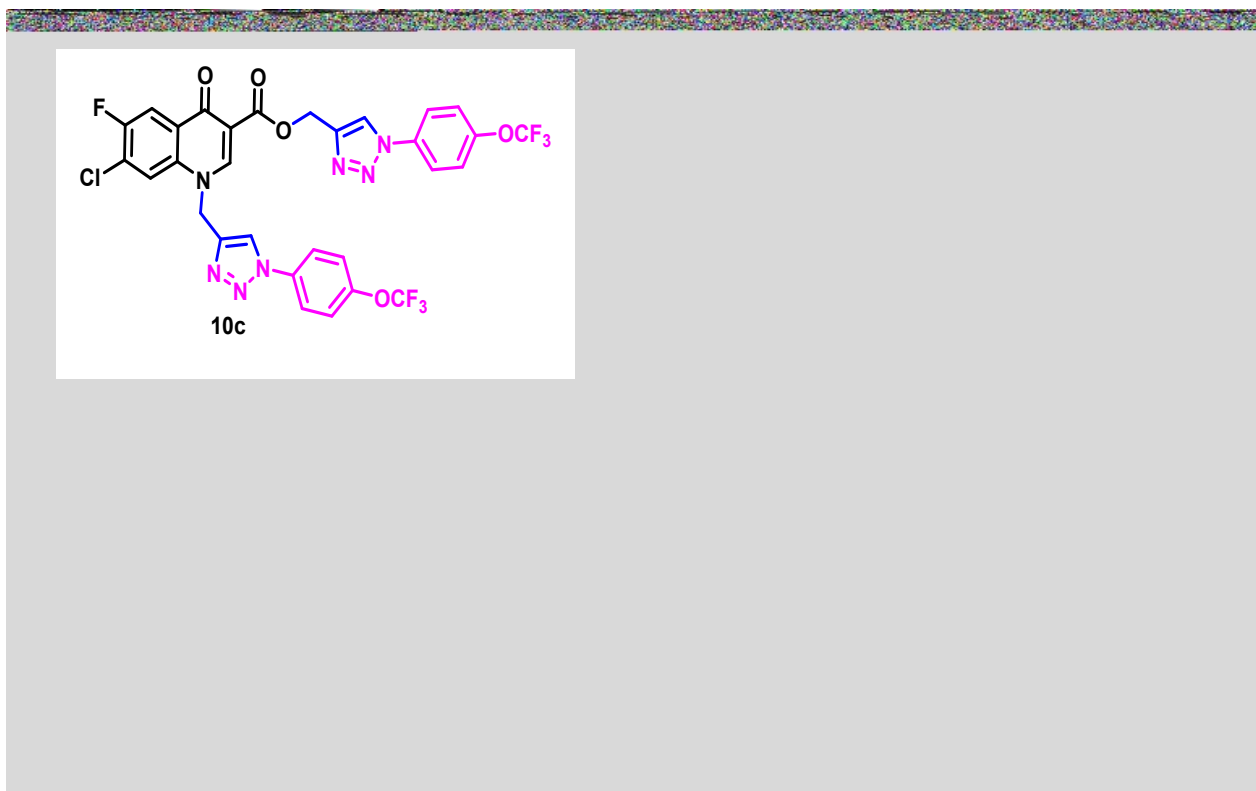

<sup>13</sup>C-NMR spectrum of compound **10c**

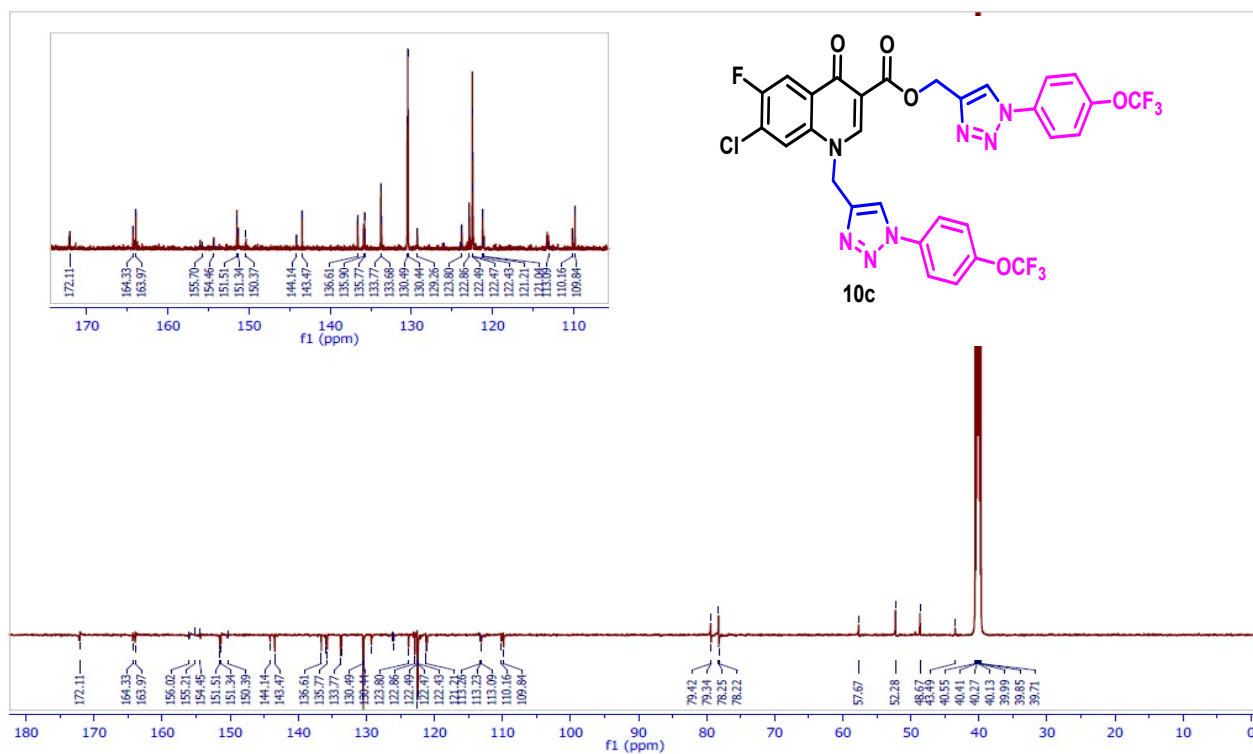

<sup>1</sup>H-NMR spectrum of compound **10d**

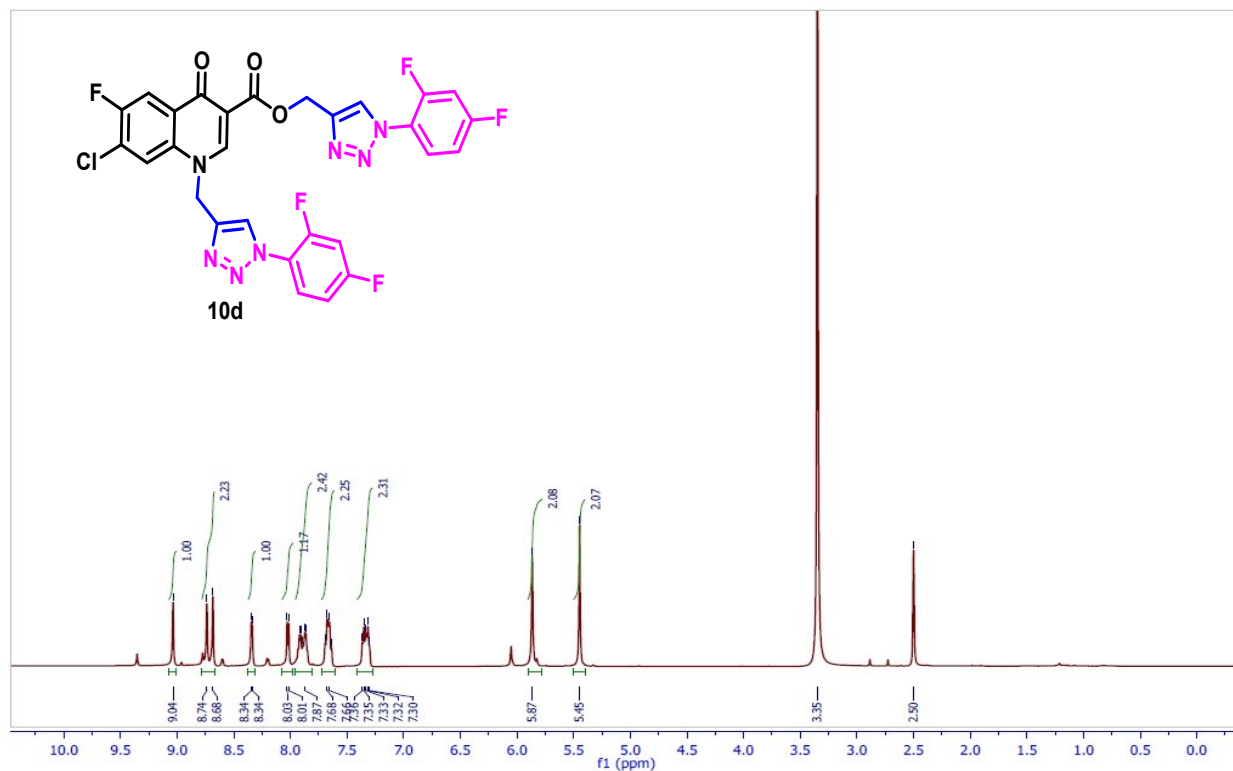

<sup>13</sup>C-NMR spectrum of compound **10d**

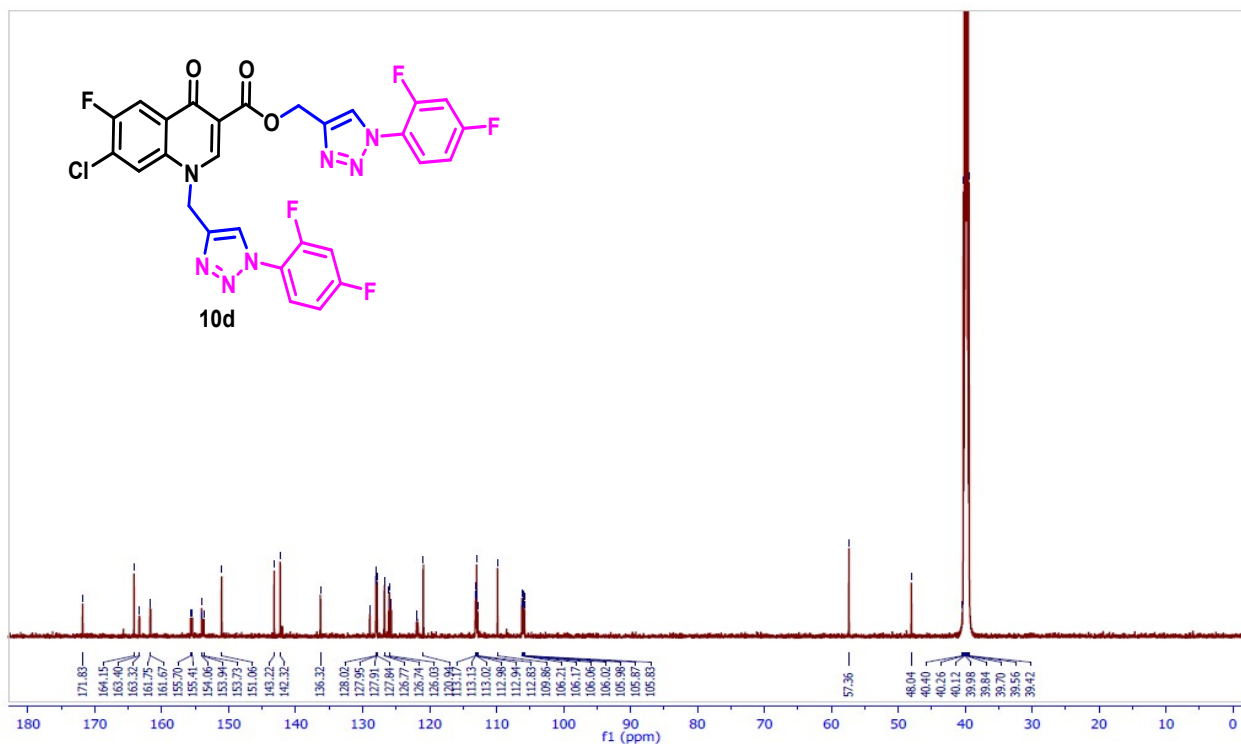

<sup>1</sup>H-NMR spectrum of compound **10e**

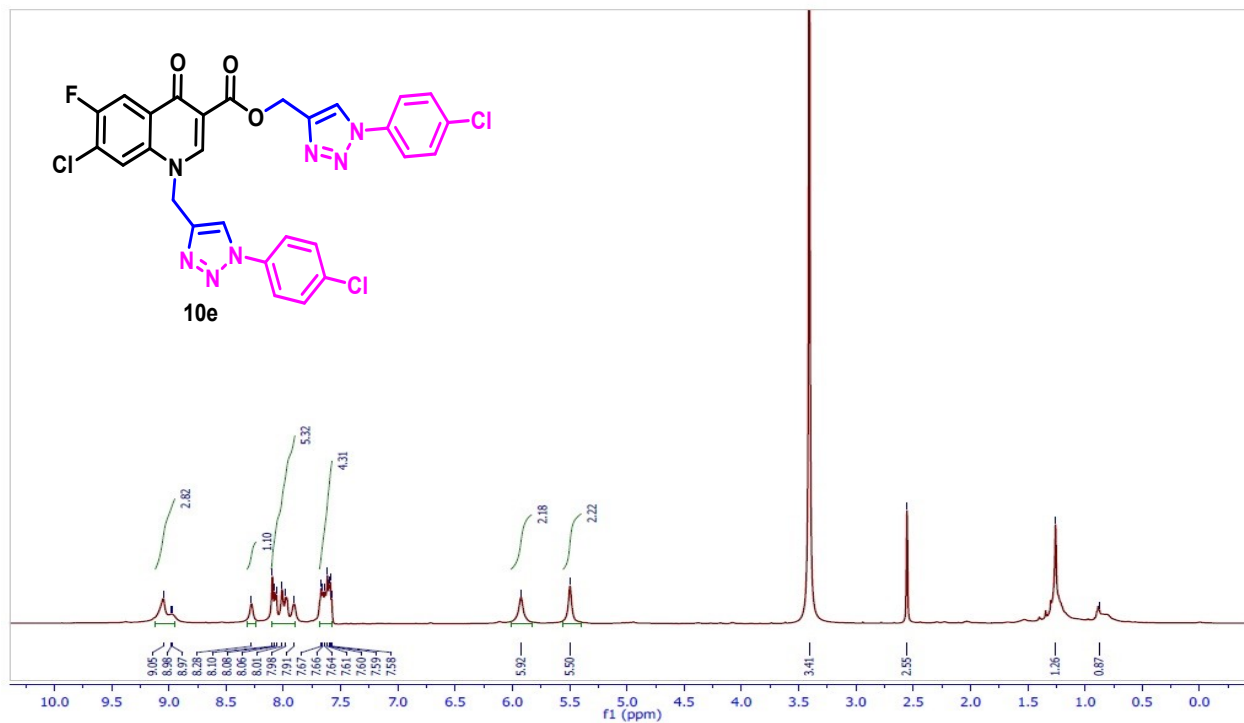

<sup>13</sup>C-NMR spectrum of compound **10e**

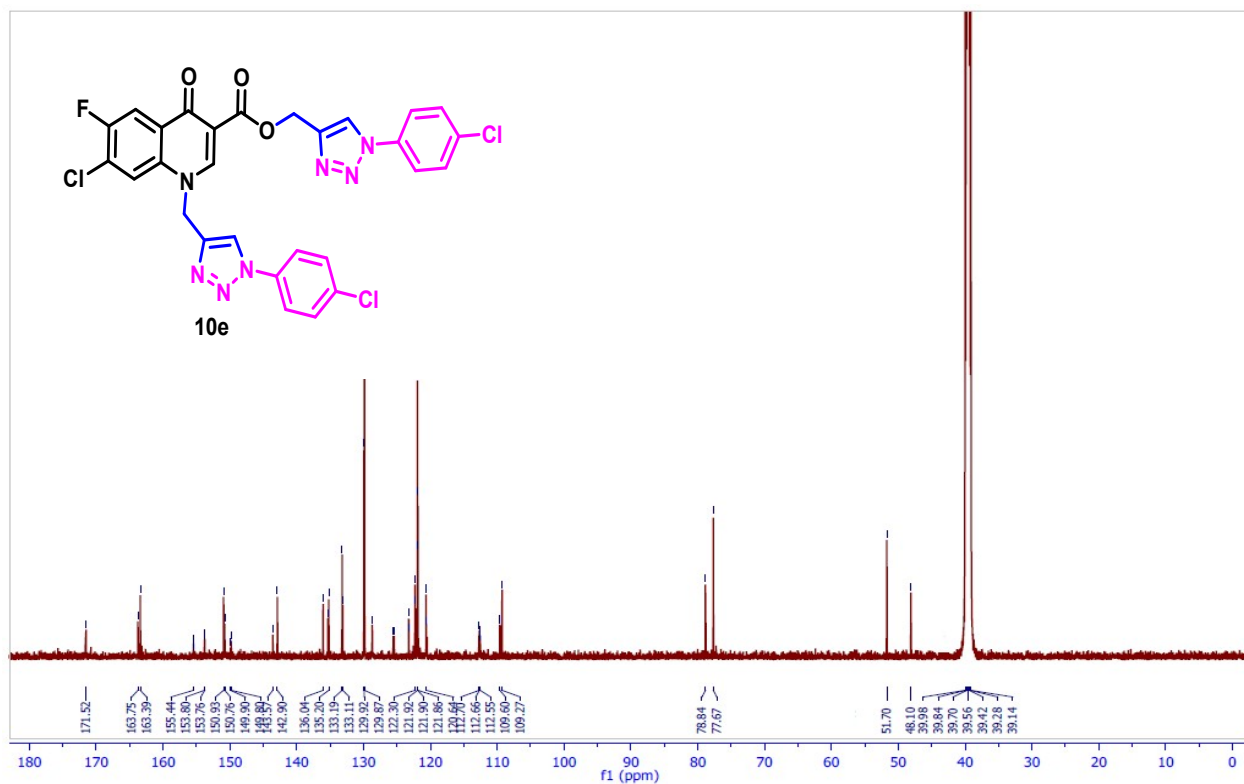

<sup>1</sup>H-NMR spectrum of compound **10f**

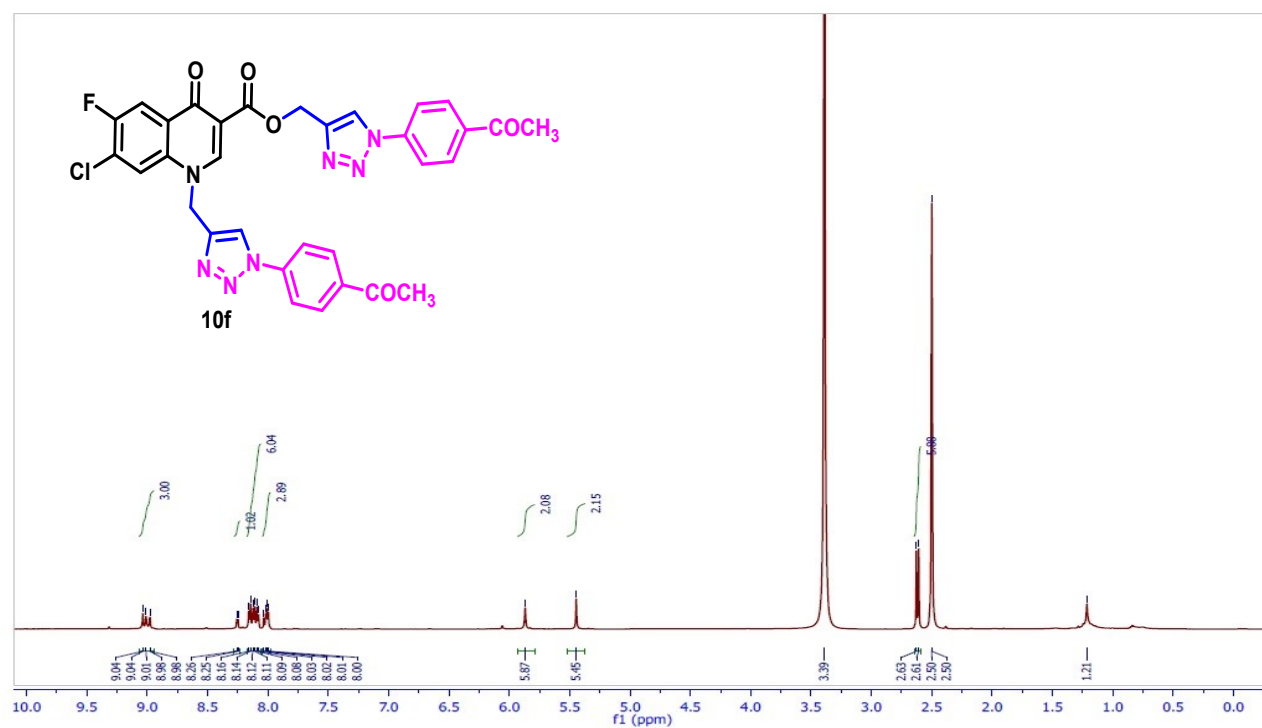

<sup>13</sup>C-NMR spectrum of compound **10f**

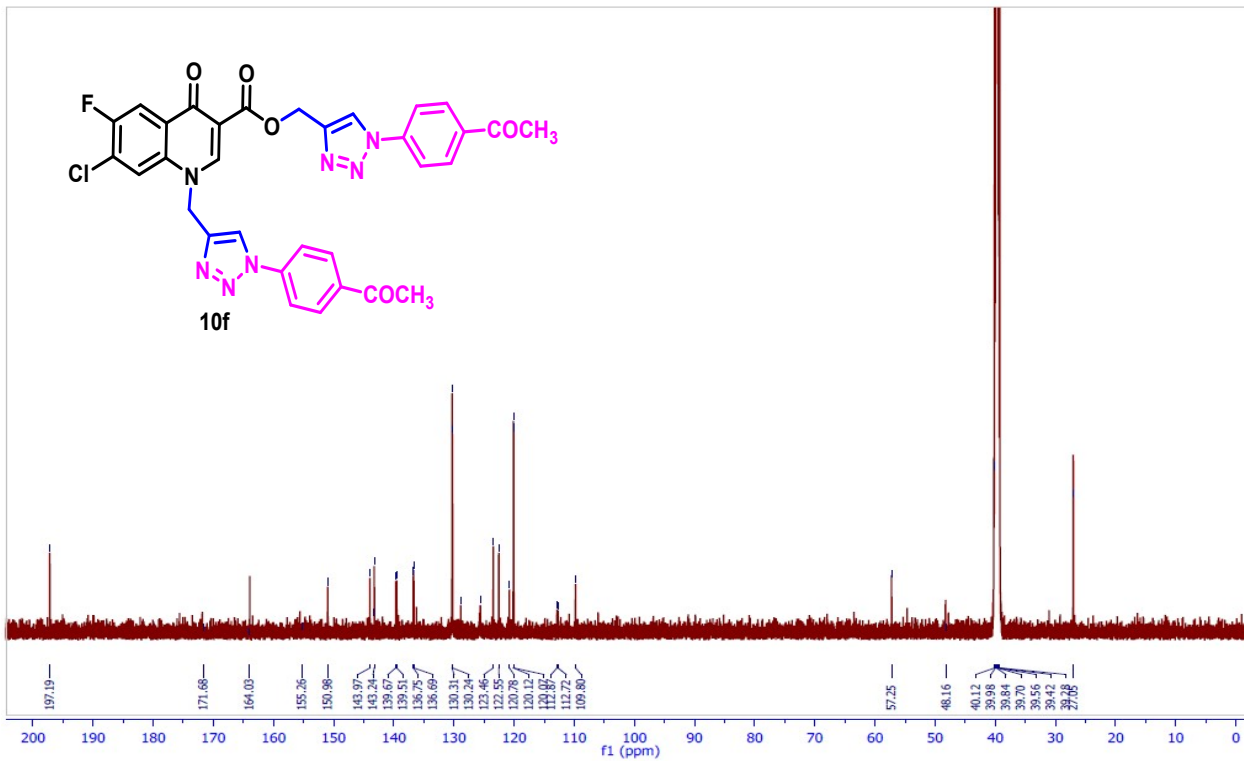

<sup>1</sup>H-NMR spectrum of compound **10g**

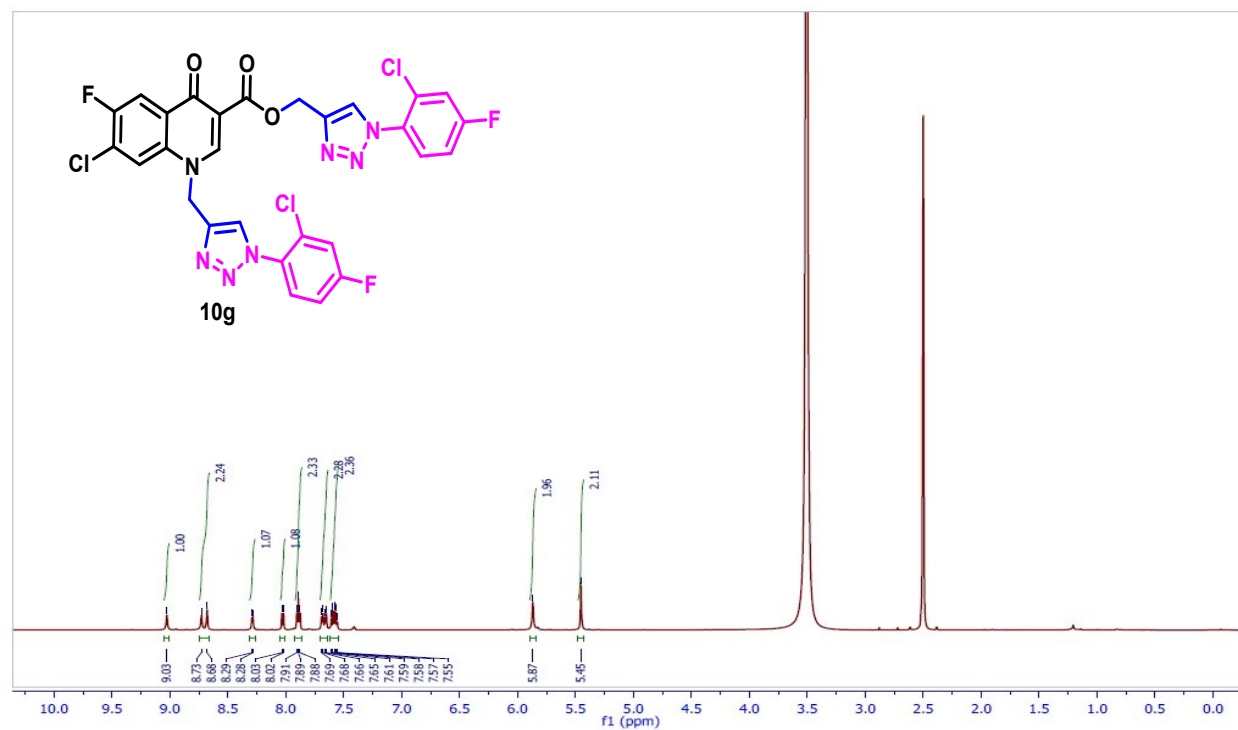

<sup>13</sup>C-NMR spectrum of compound **10g**

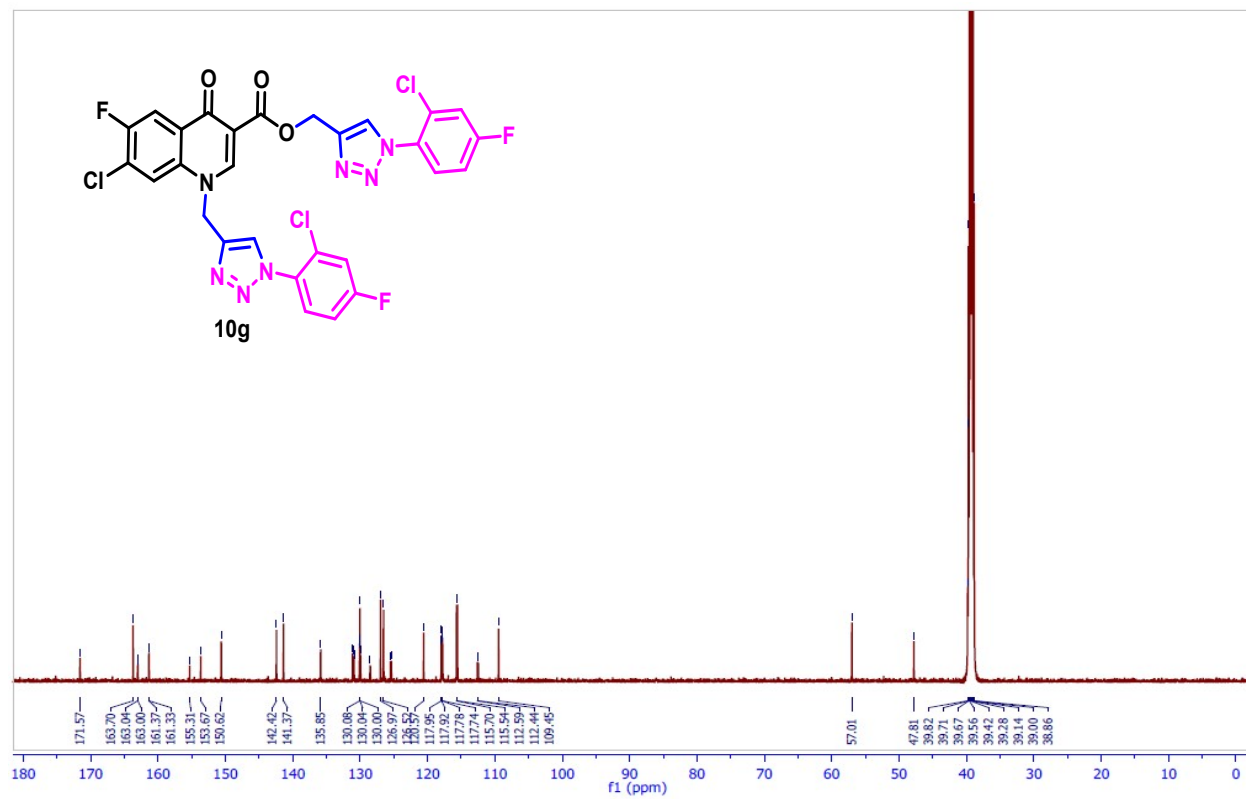



<sup>1</sup>H-NMR spectrum of compound **10h**

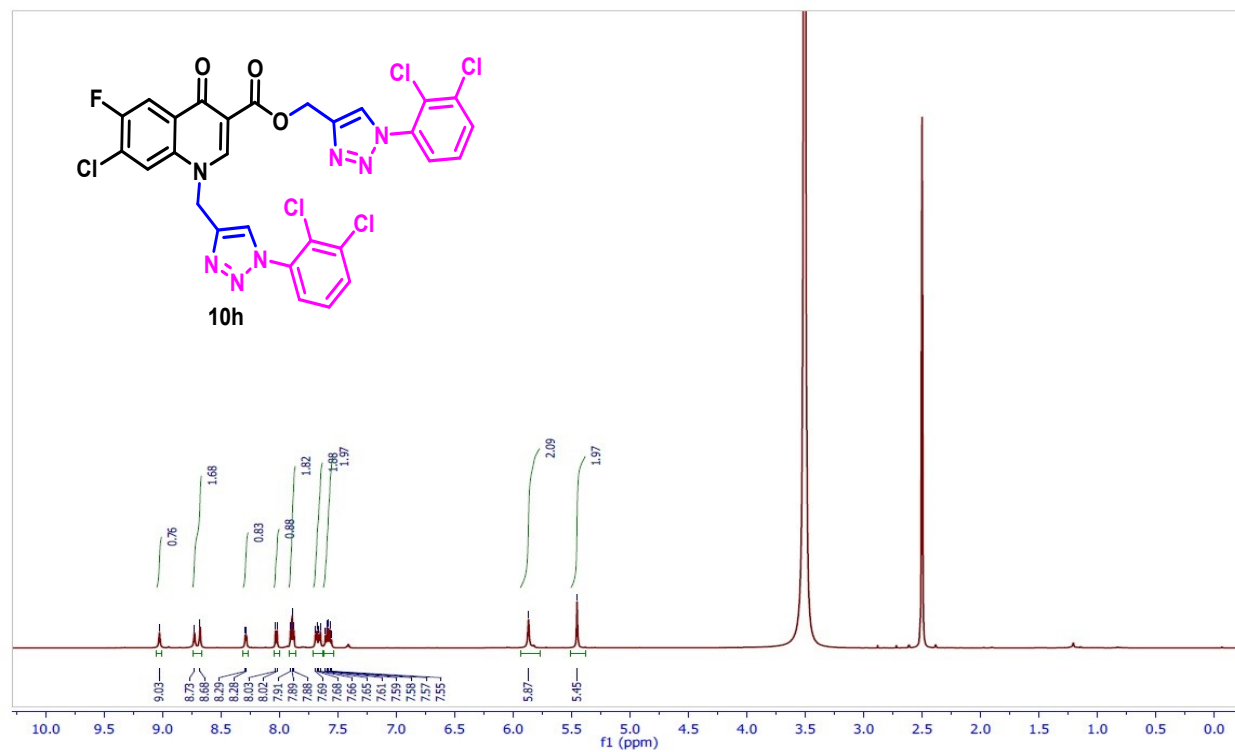

<sup>13</sup>C-NMR spectrum of compound **10h**

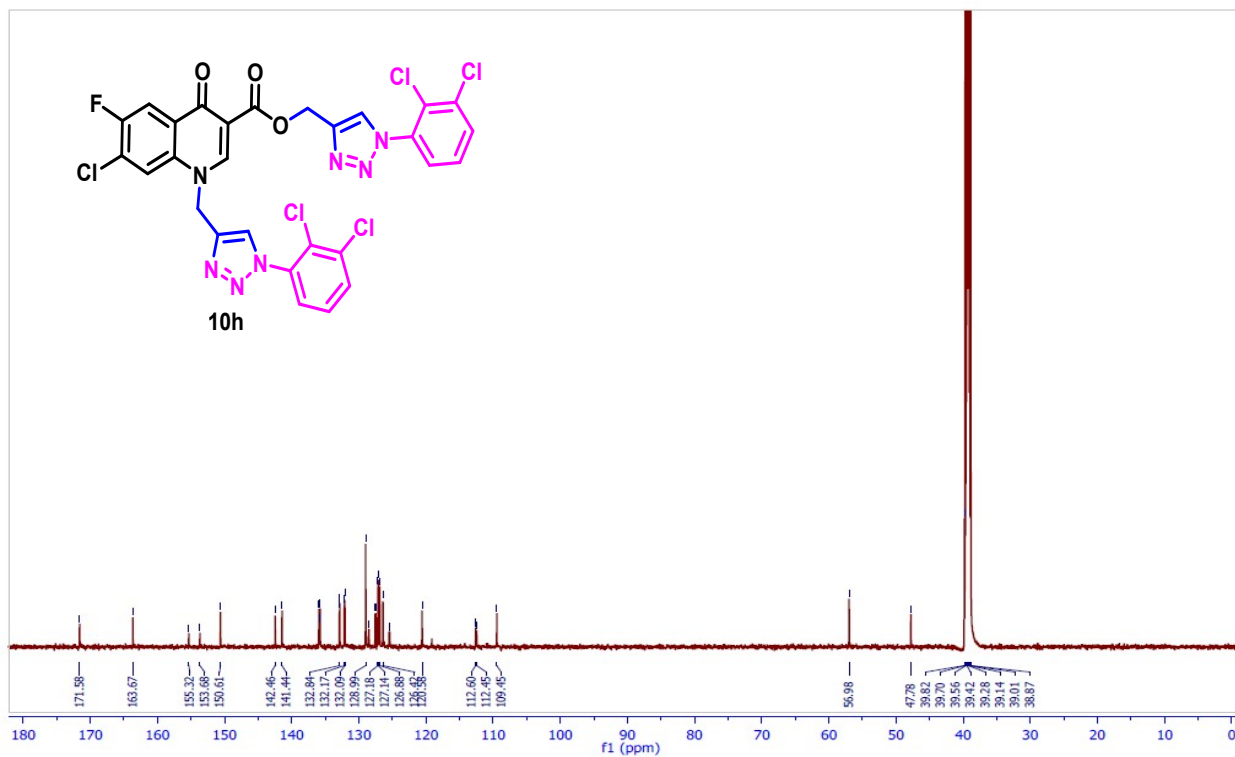

<sup>1</sup>H-NMR spectrum of compound **10i**

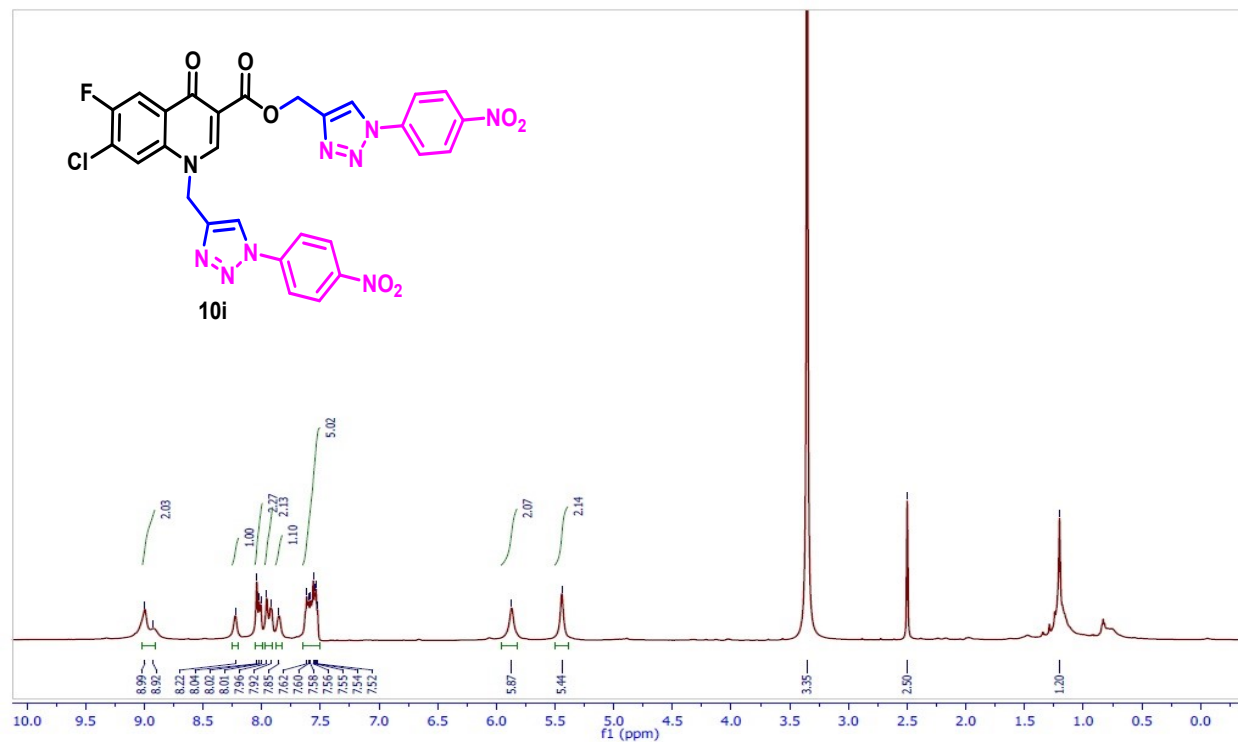

<sup>13</sup>C-NMR spectrum of compound **10i**

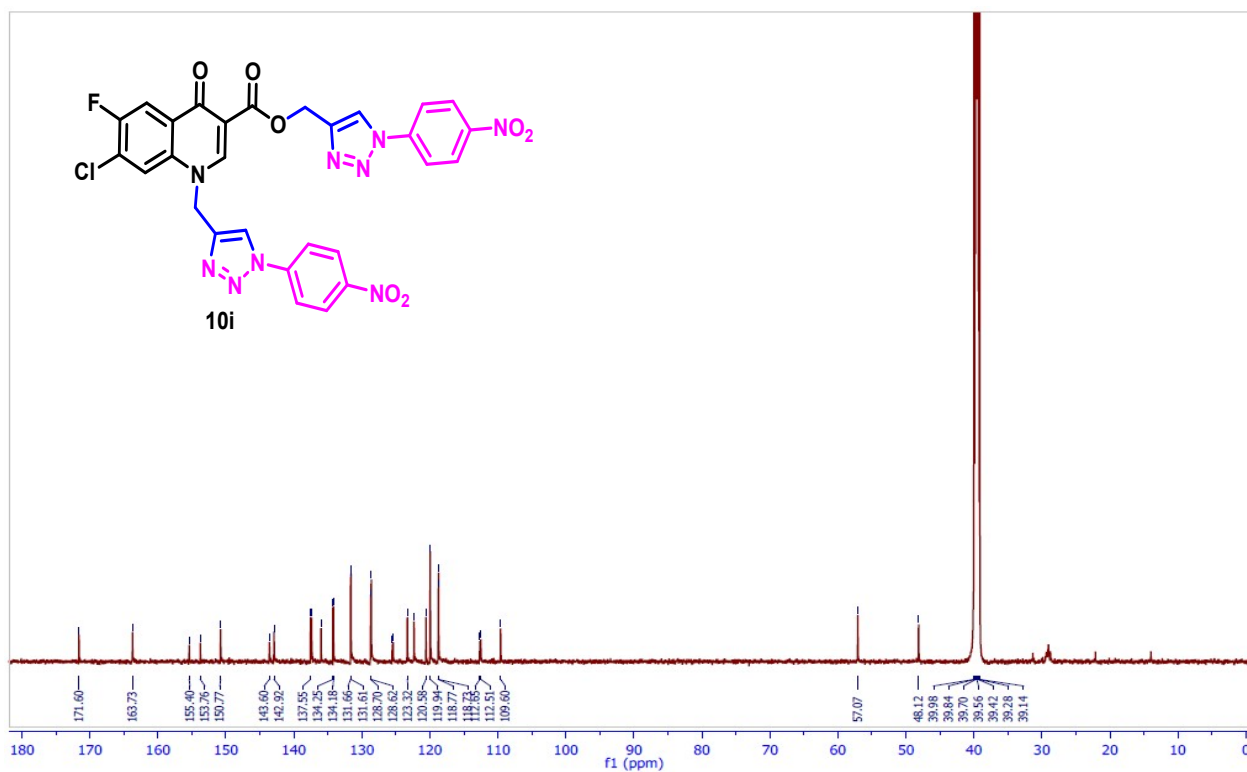

## HRMS of compound 6

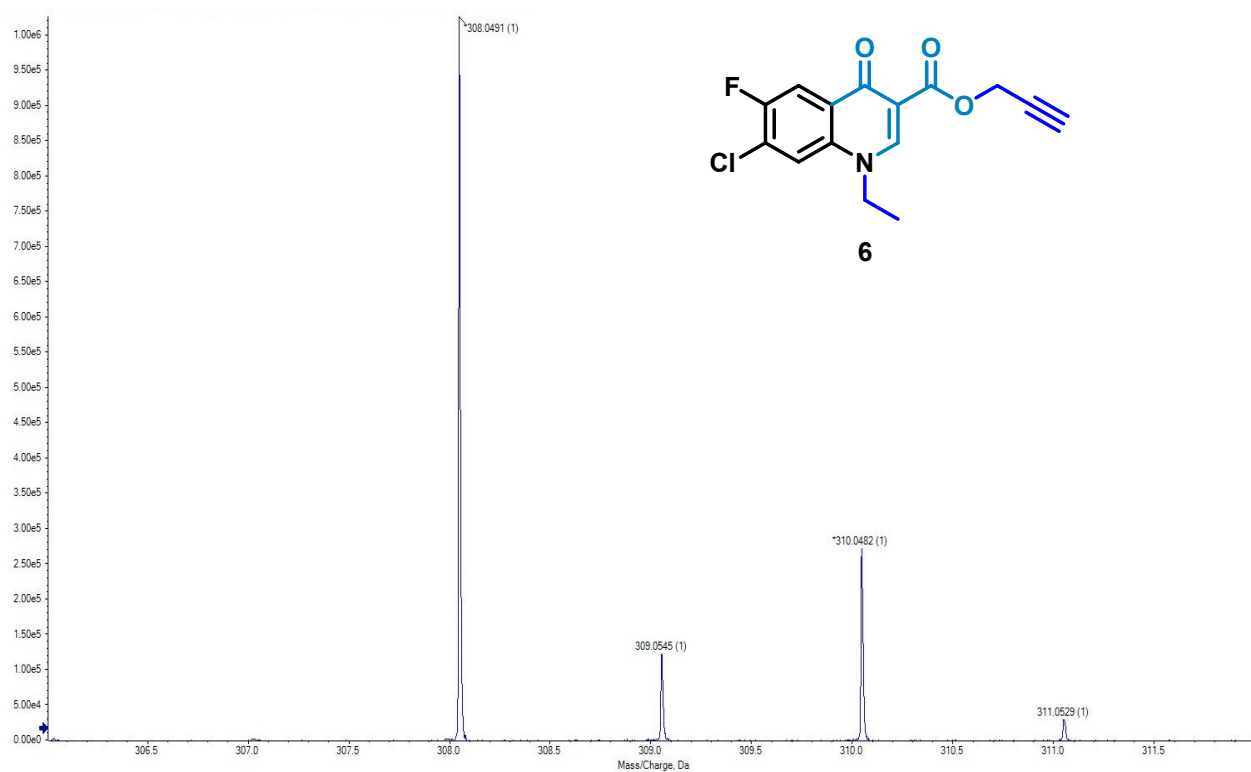

## HRMS of compound 7

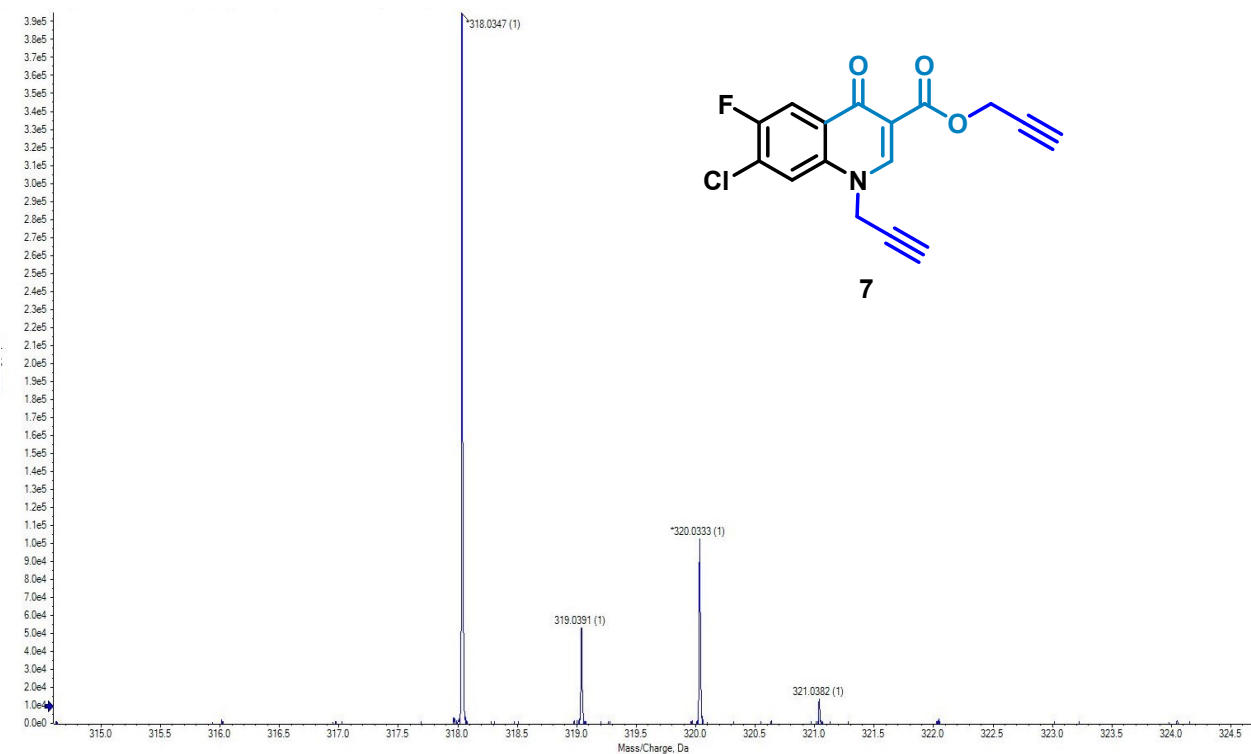

### HRMS Spectrum of **9a**

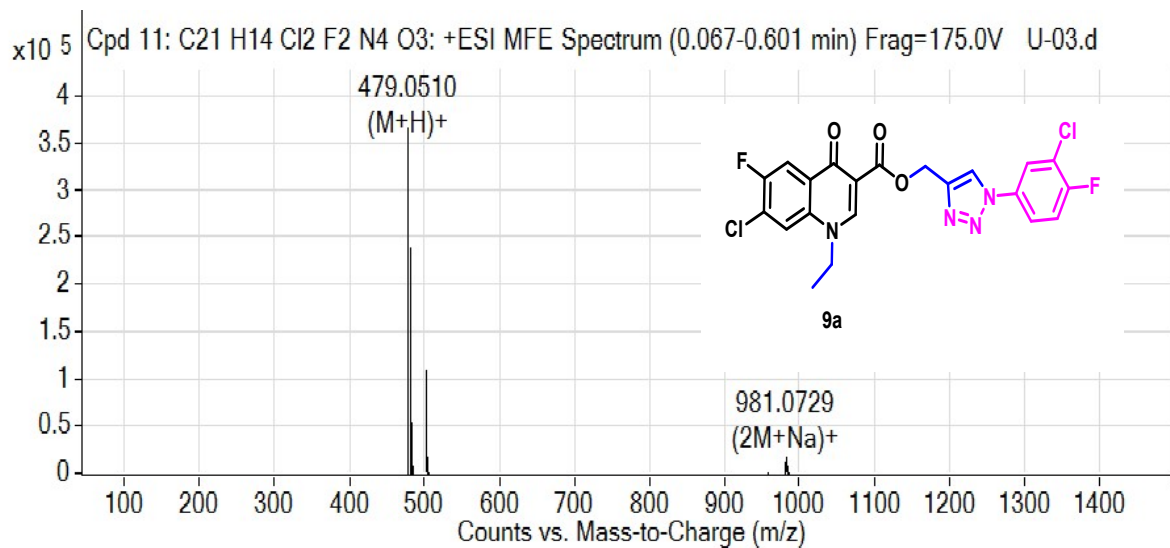

### HRMS Spectrum of **9b**

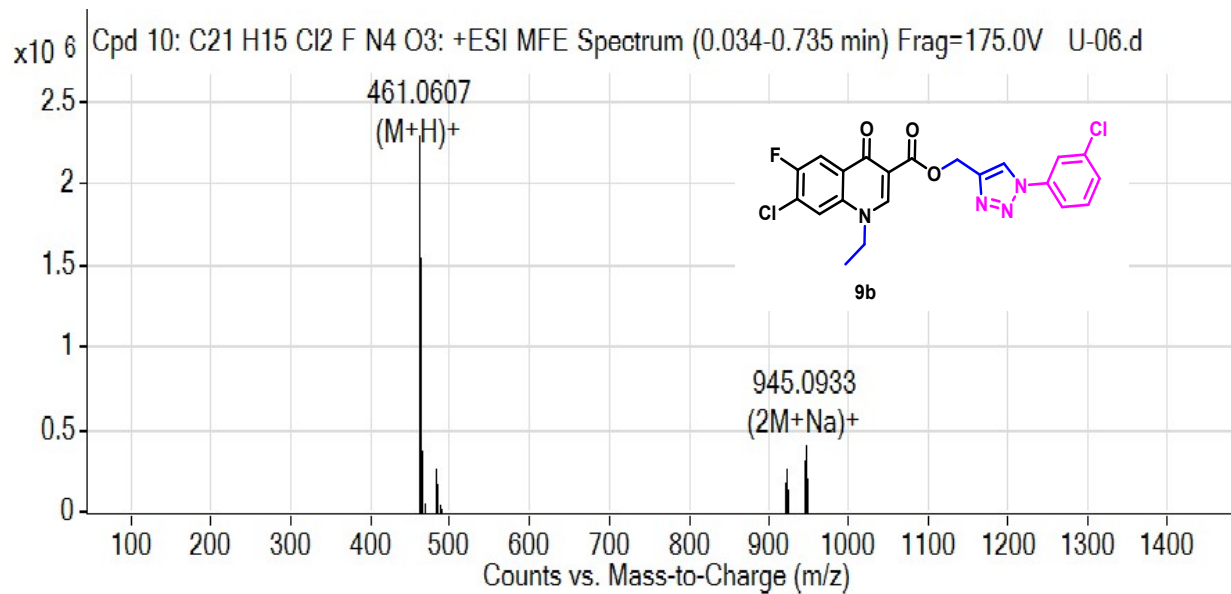

### HRMS Spectrum of 9c

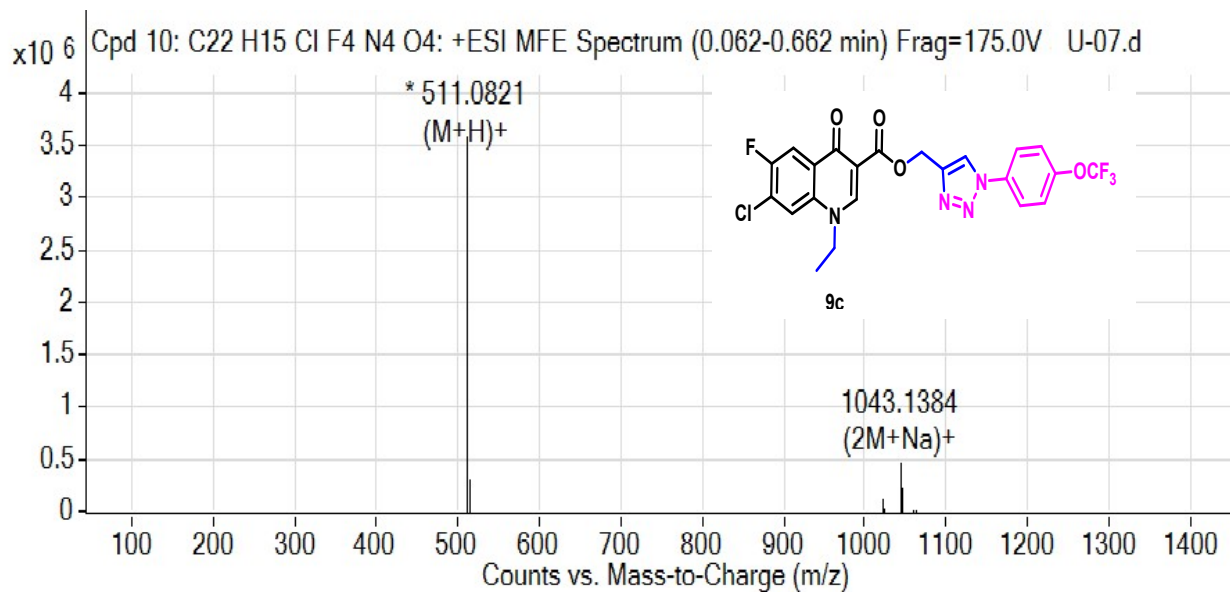

### HRMS Spectrum of 9d

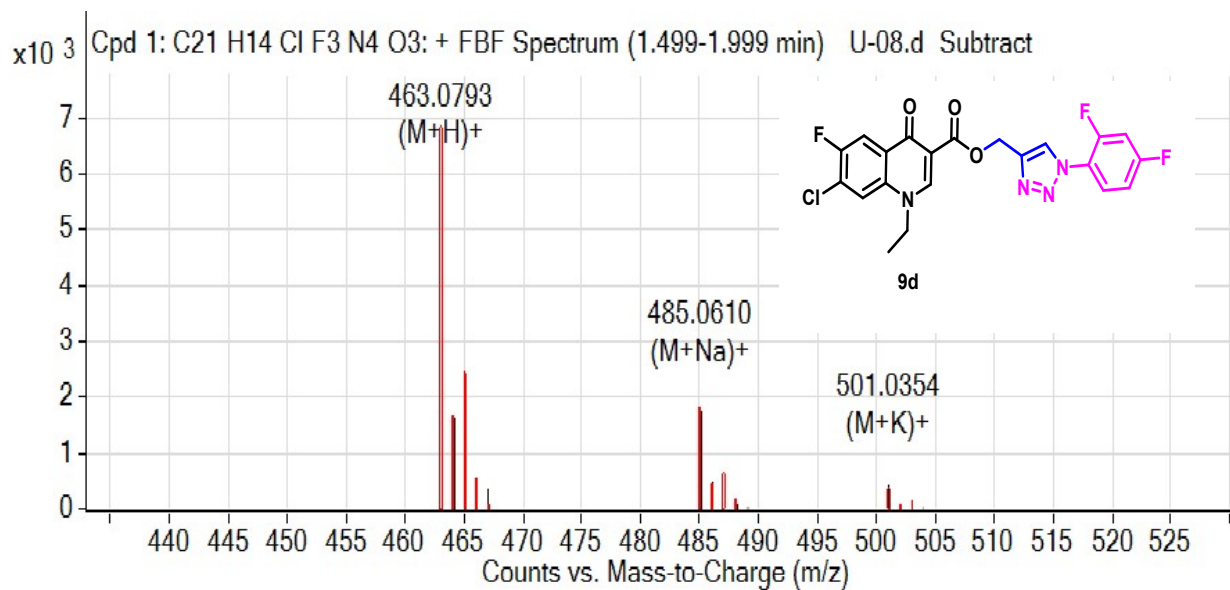

### HRMS Spectrum of 9e

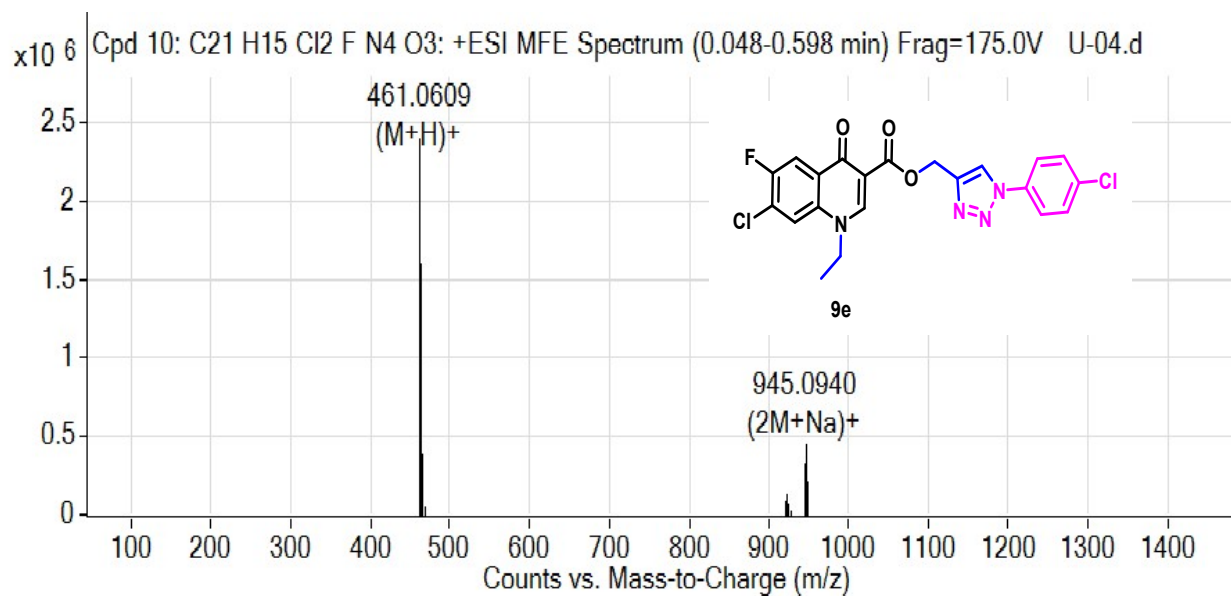

### HRMS of compound 9f

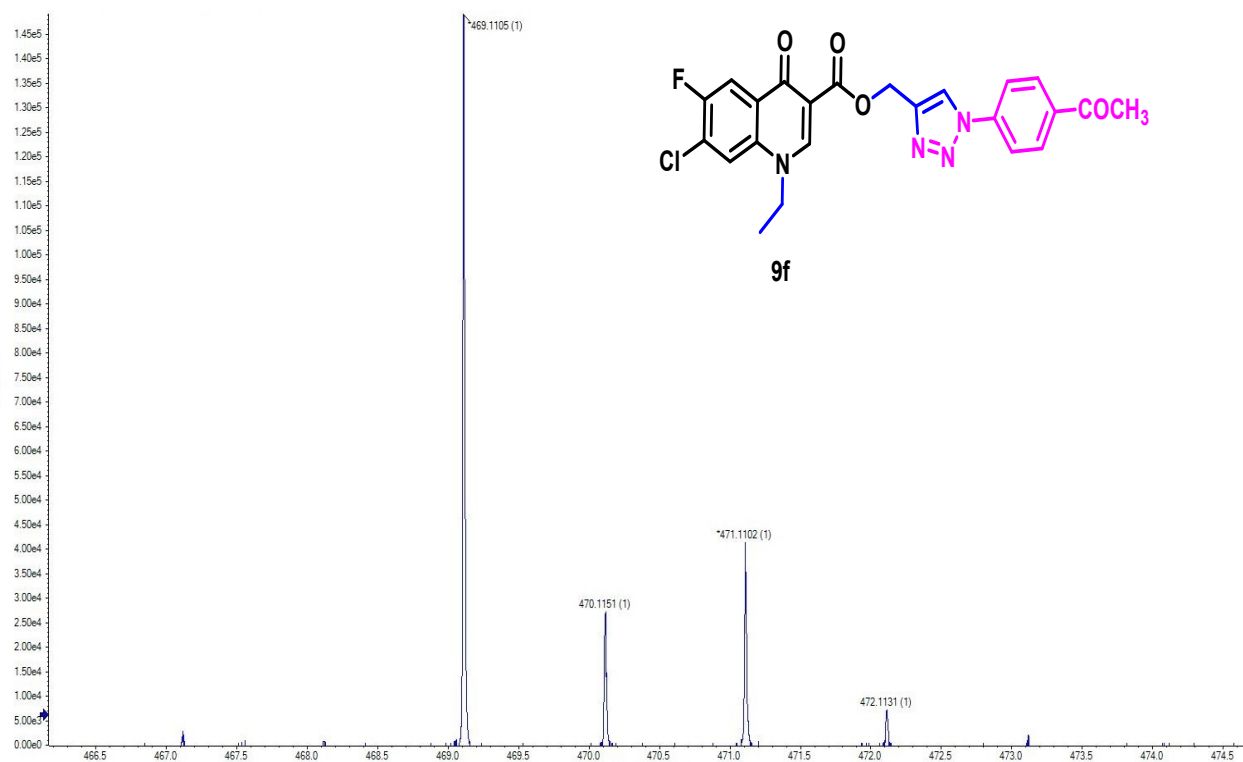

### HRMS of compound 10f

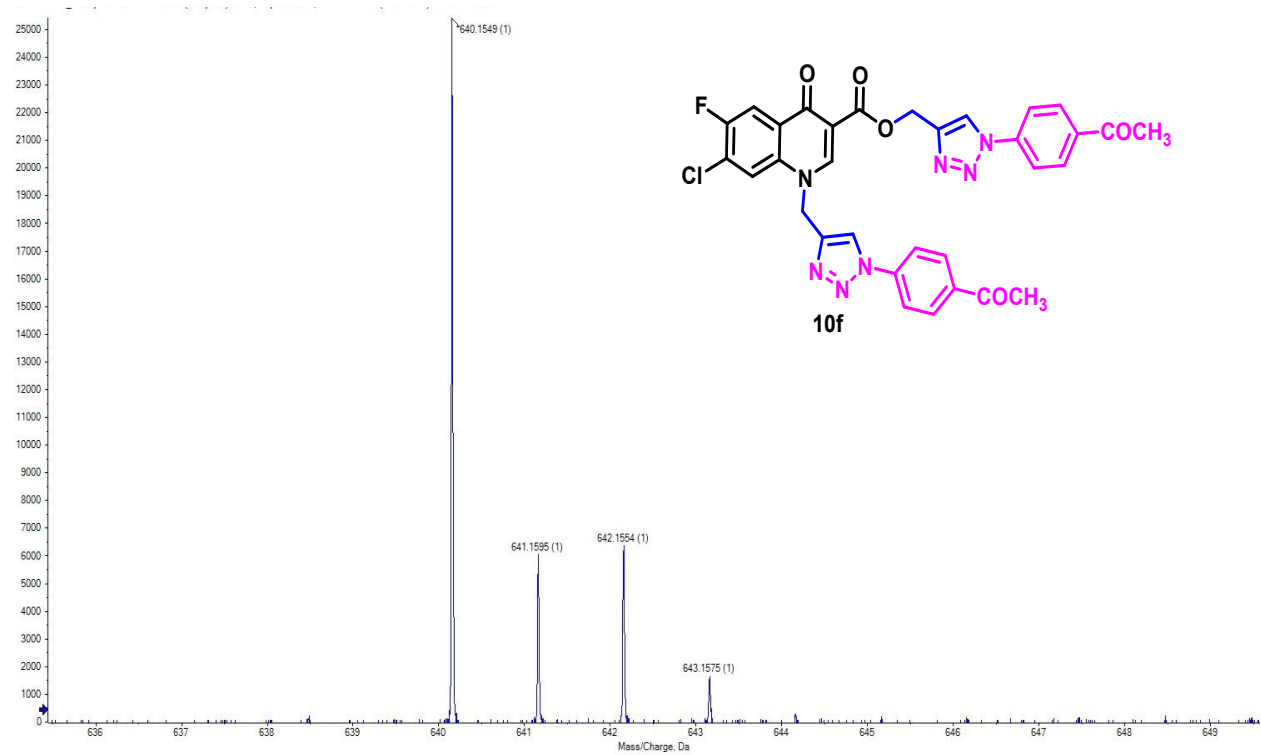

### FT-IR of compound 6

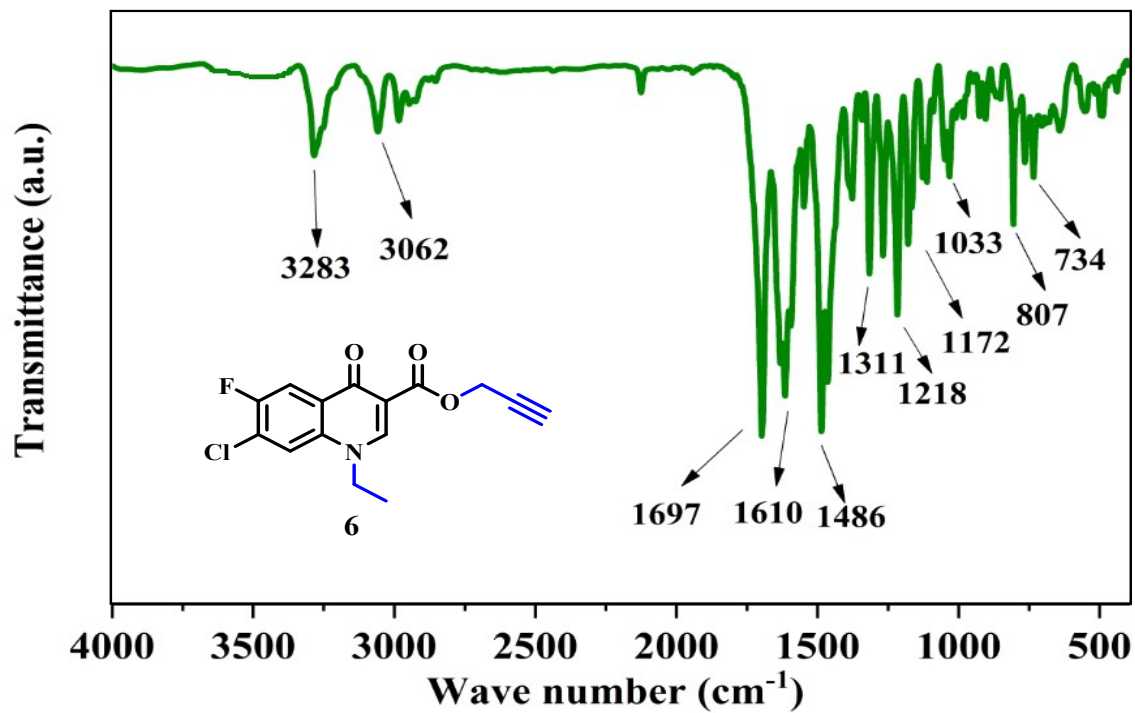

FT-IR of compound 7

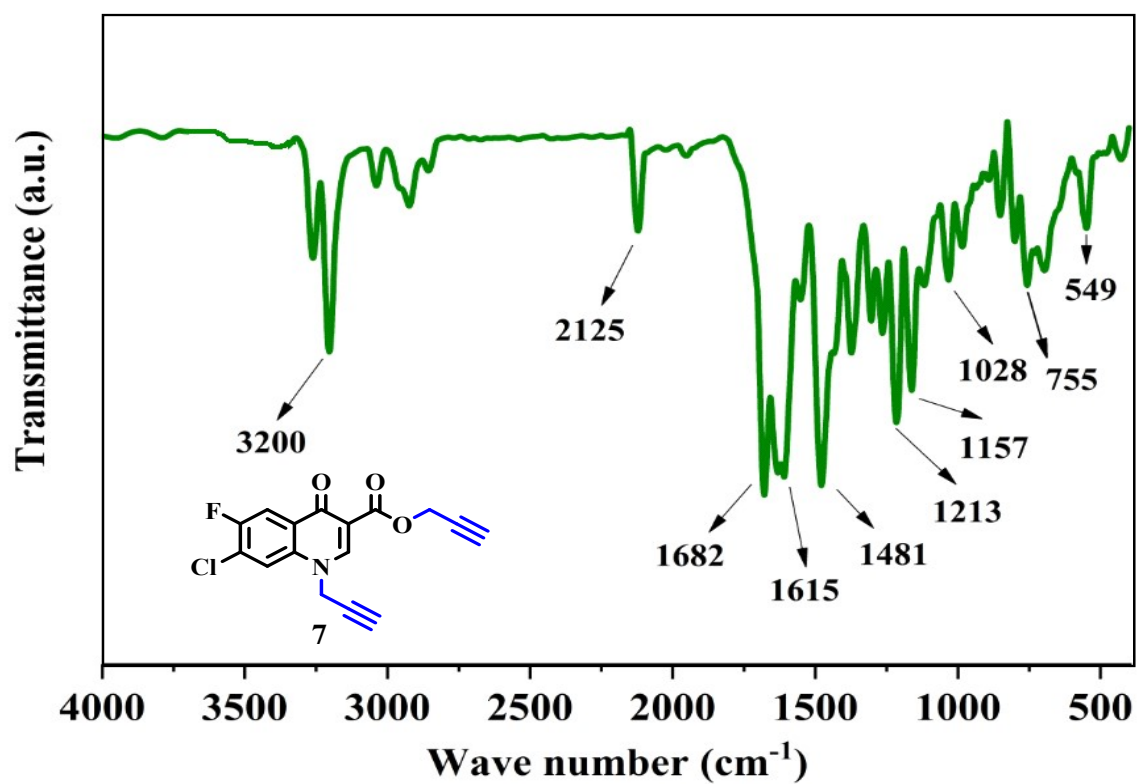

FT-IR of compound 9a

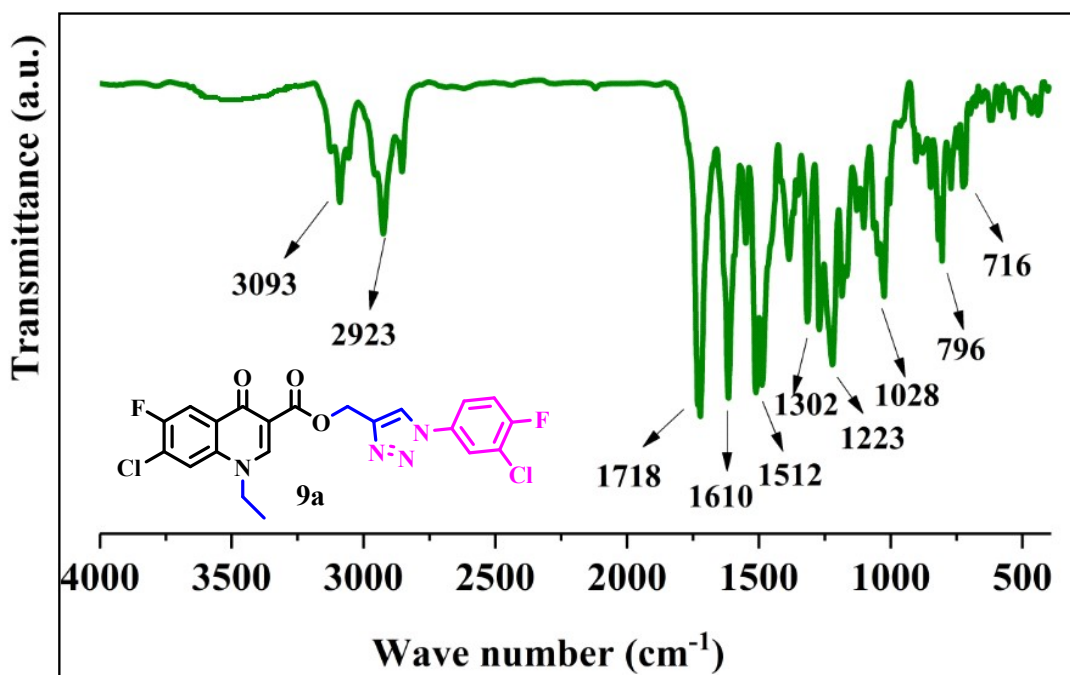



FT-IR of compound **9b**

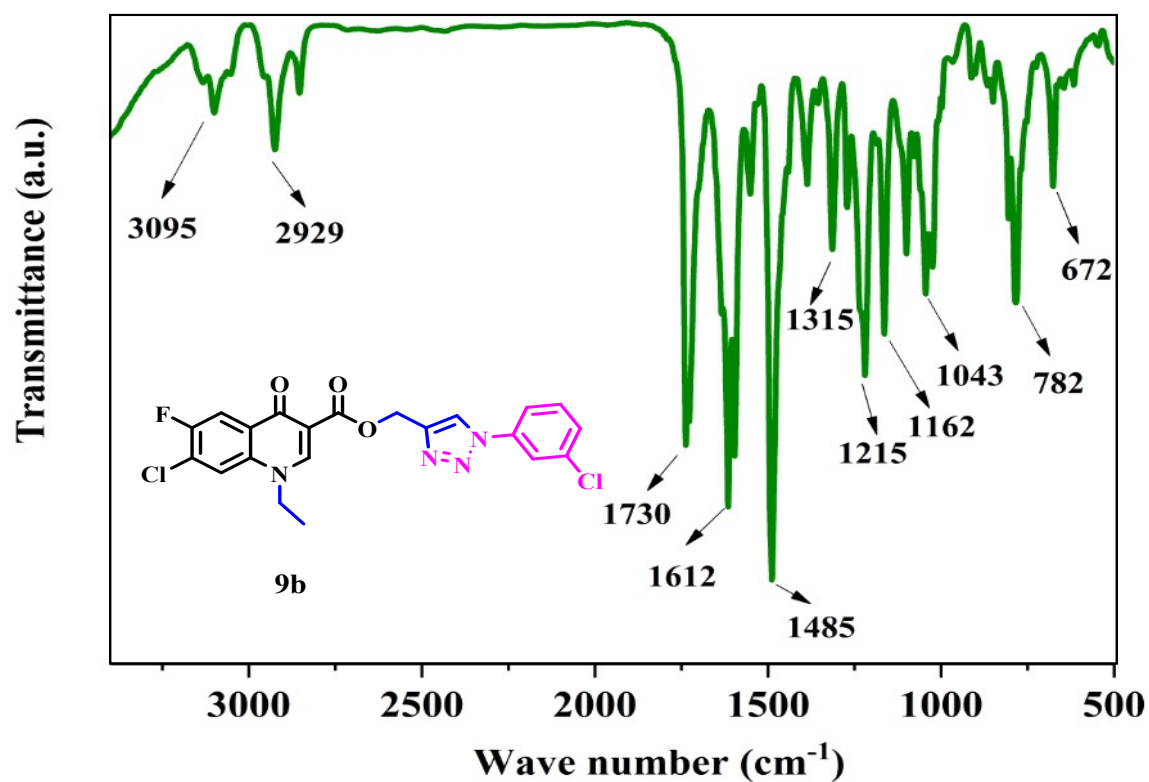

FT-IR of compound **9c**

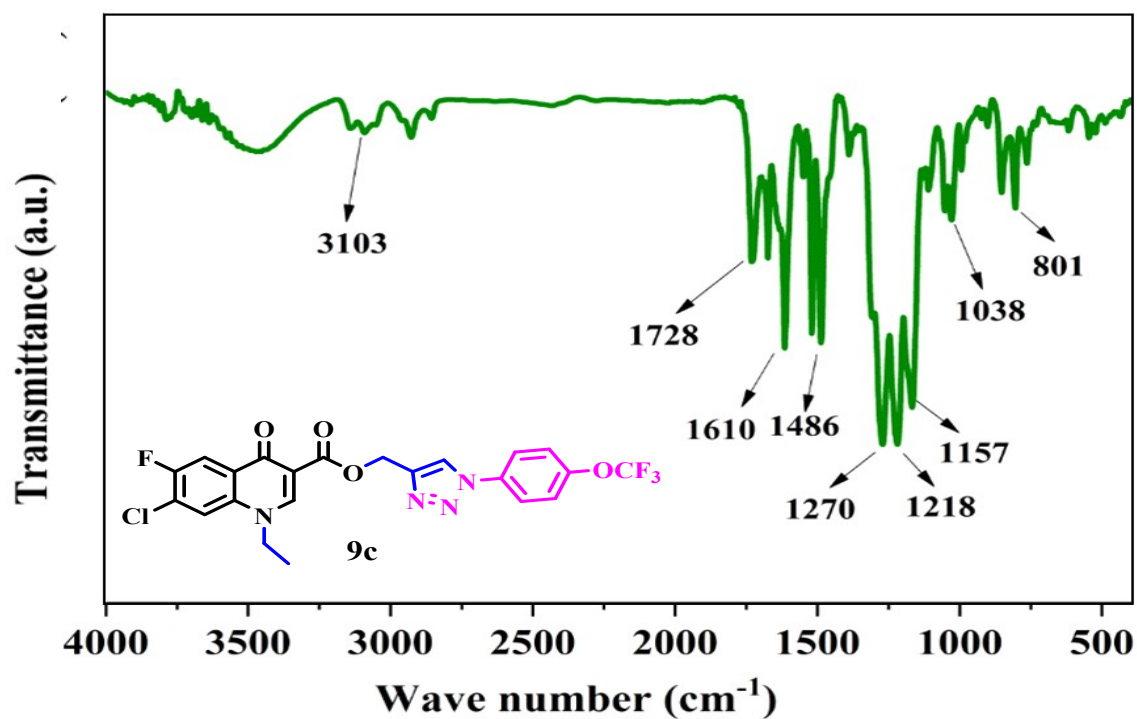

FT-IR of compound 9d

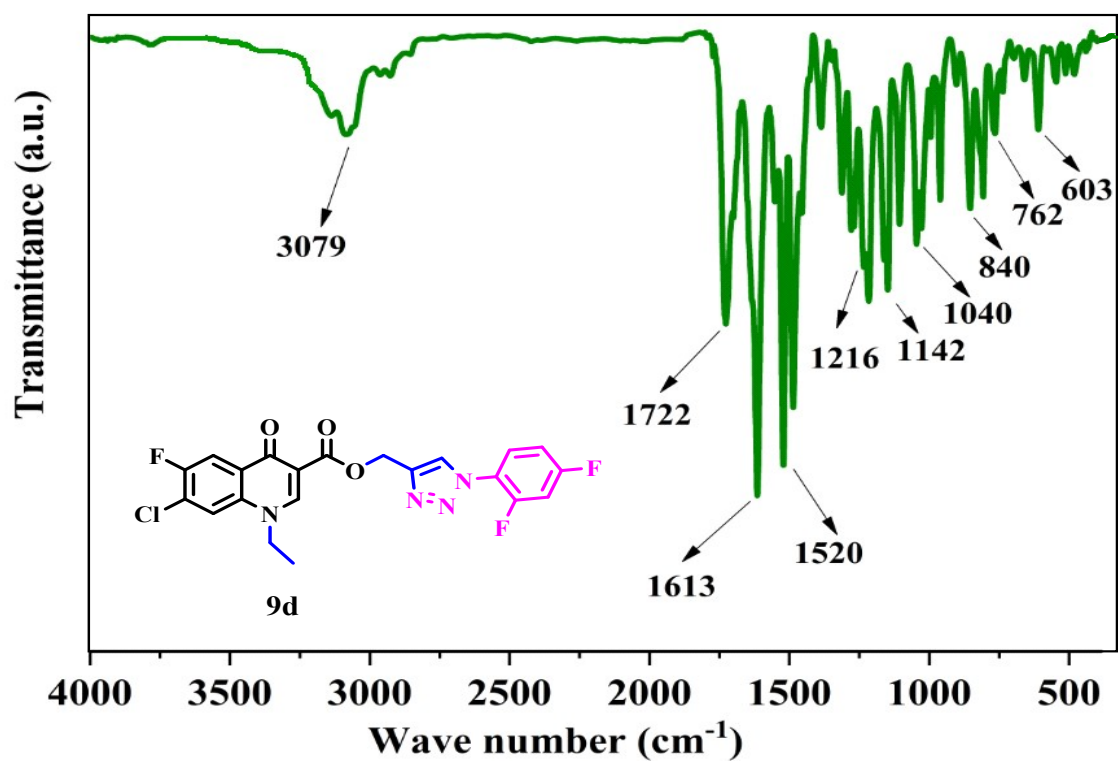

FT-IR of compound 9e

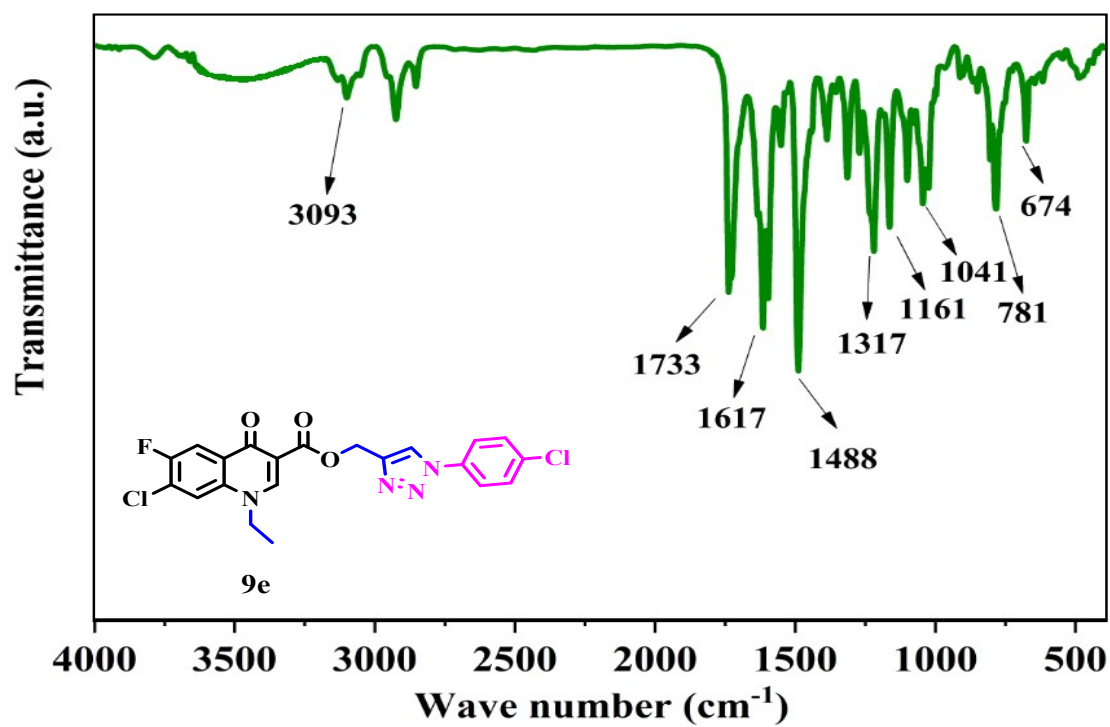

FT-IR of compound **9f**

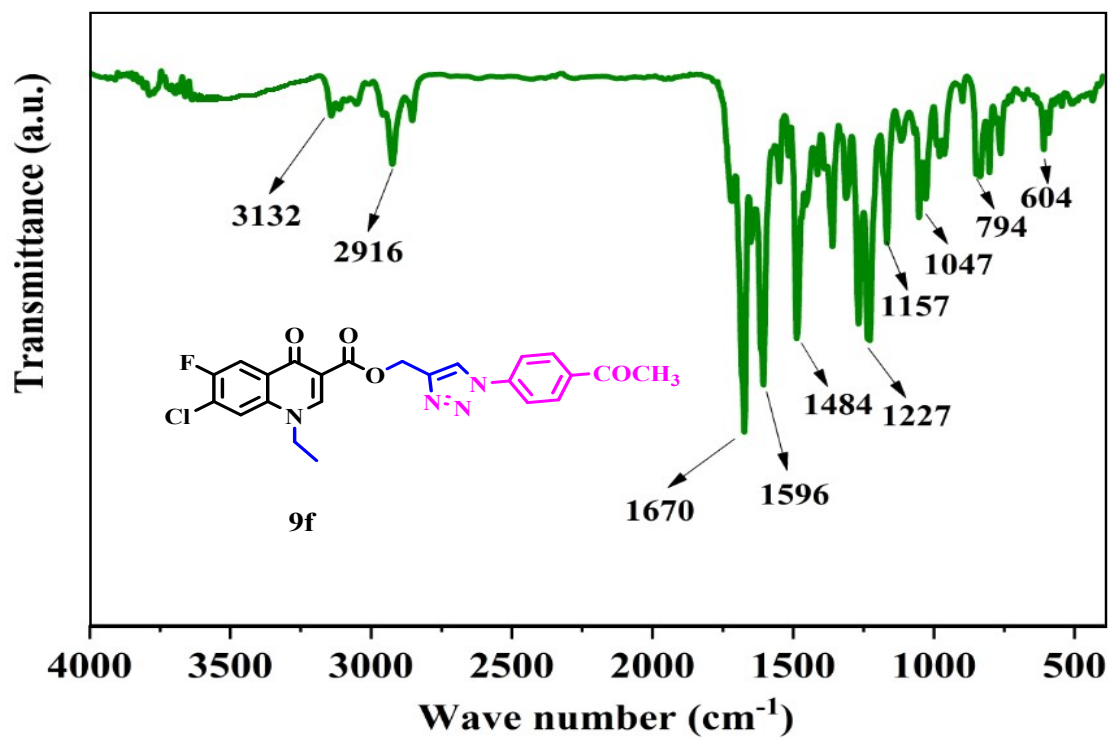

FT-IR of compound **9g**

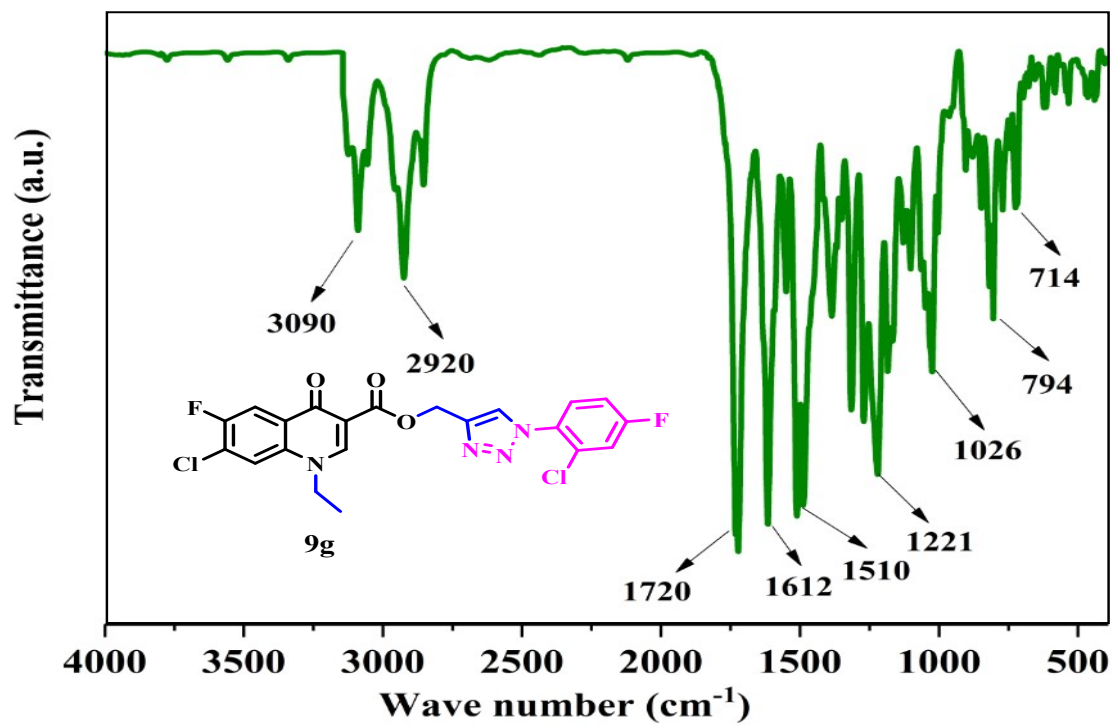

FT-IR of compound **9h**

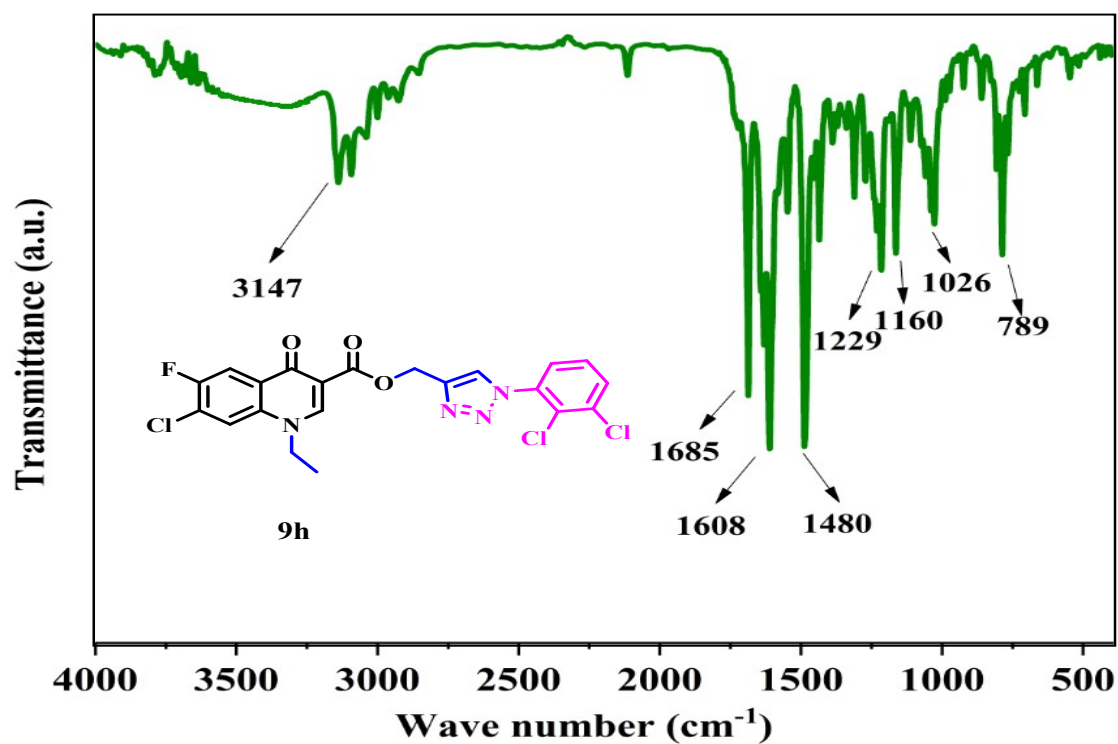

FT-IR of compound **9i**

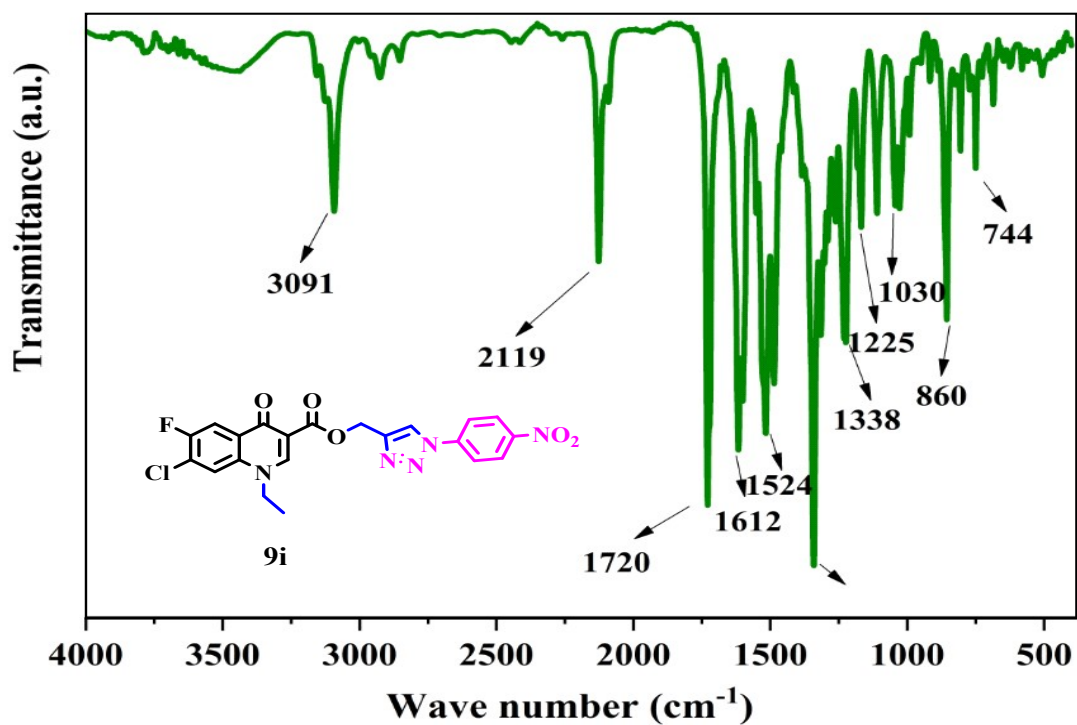

FT-IR of compound **10a**

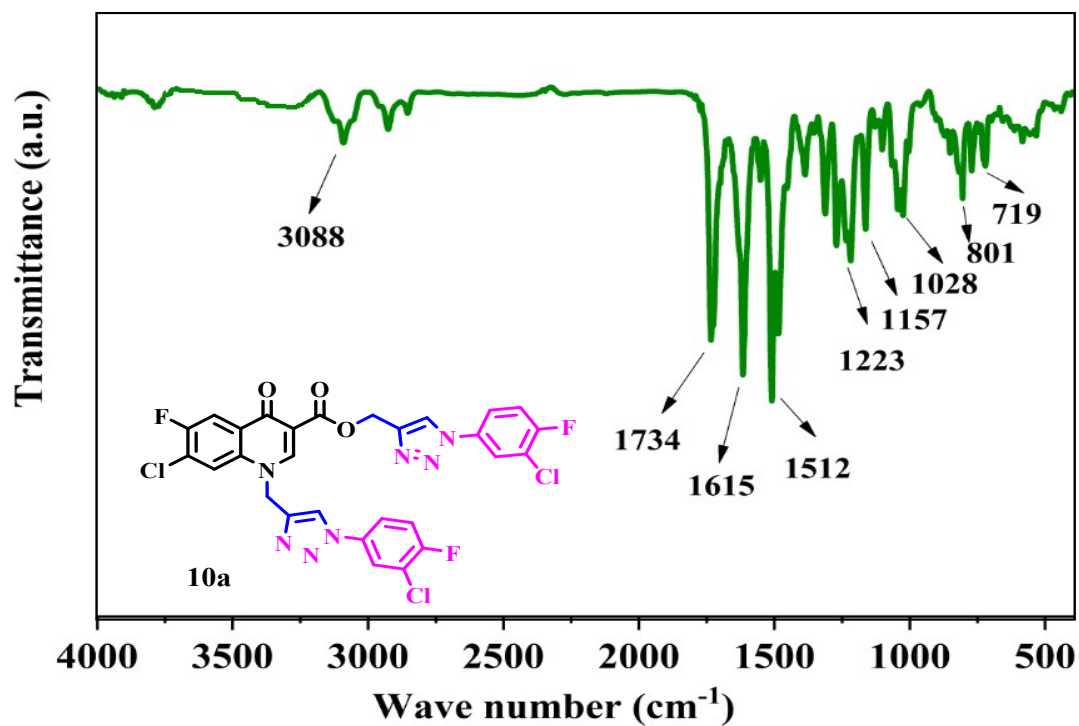

FT-IR of compound **10b**

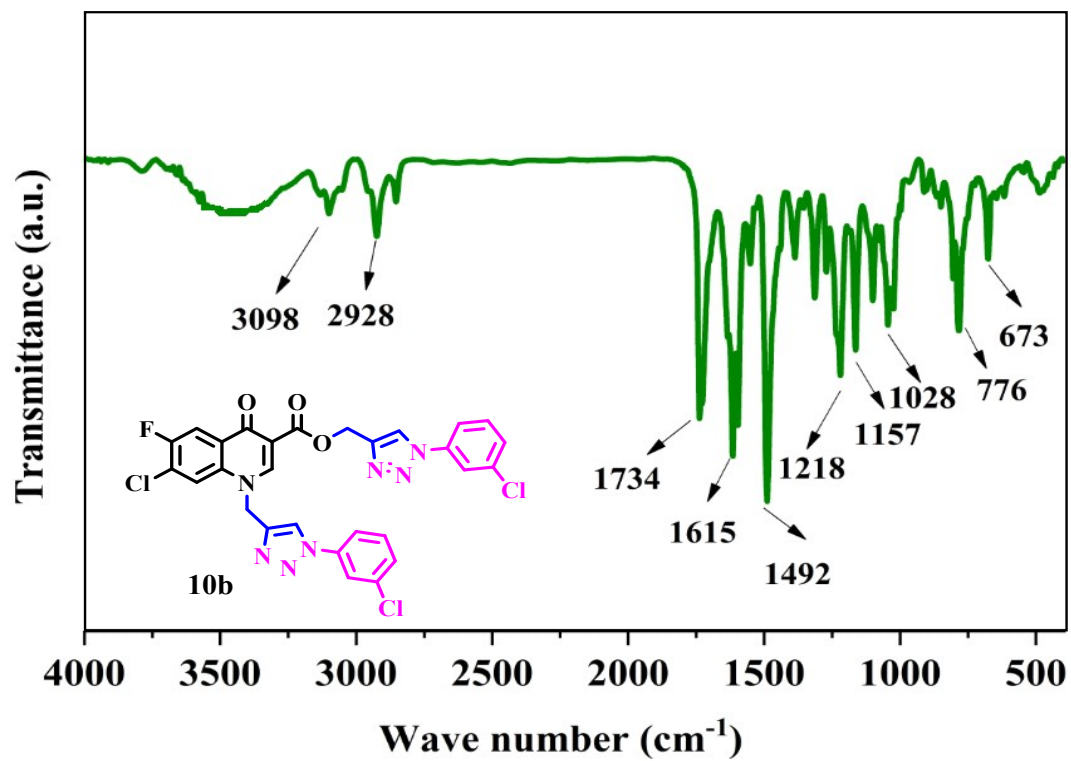

FT-IR of compound **10c**

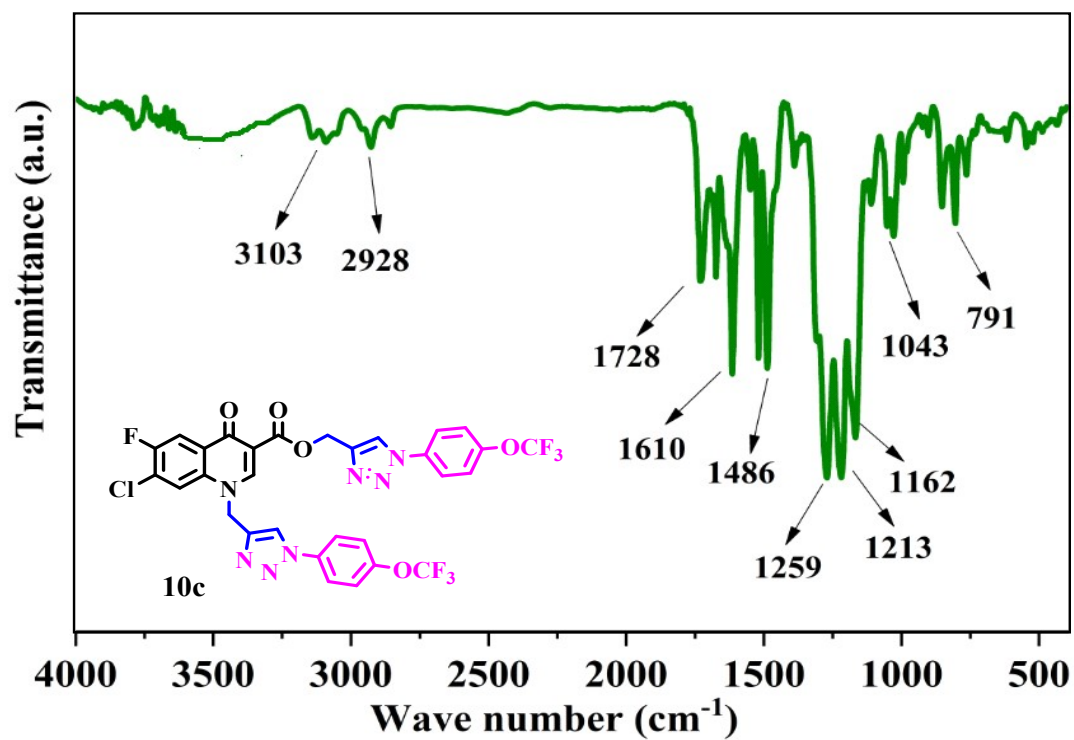

FT-IR of compound **10d**

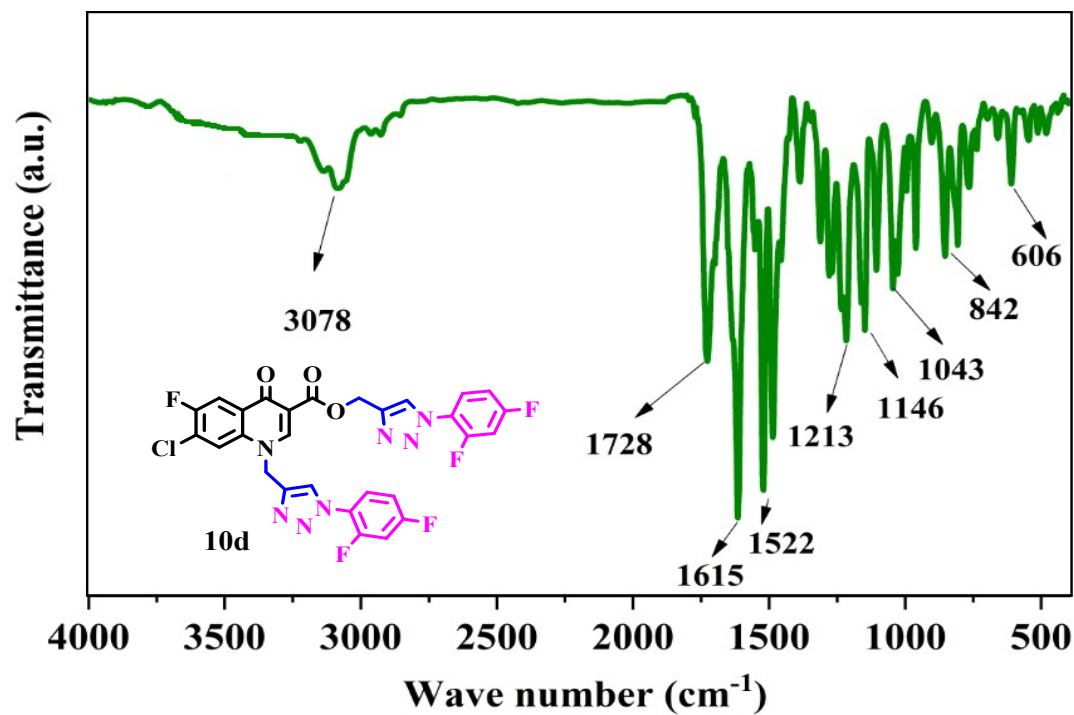

FT-IR of compound **10e**

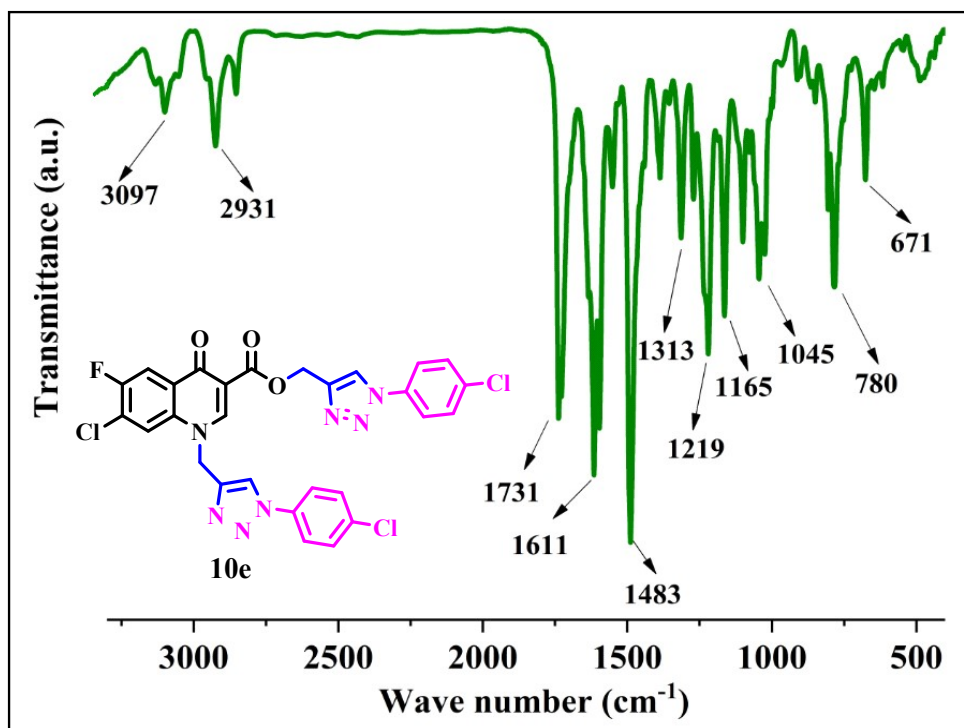

FT-IR of compound **10f**

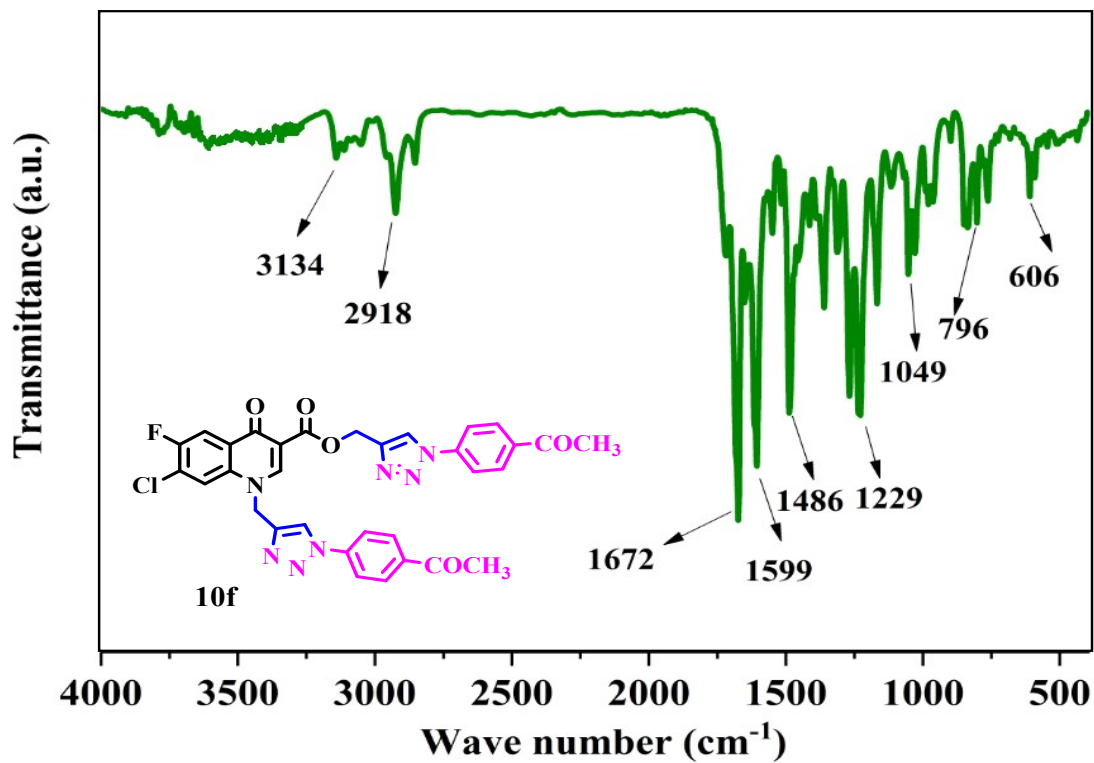

FT-IR of compound **10g**

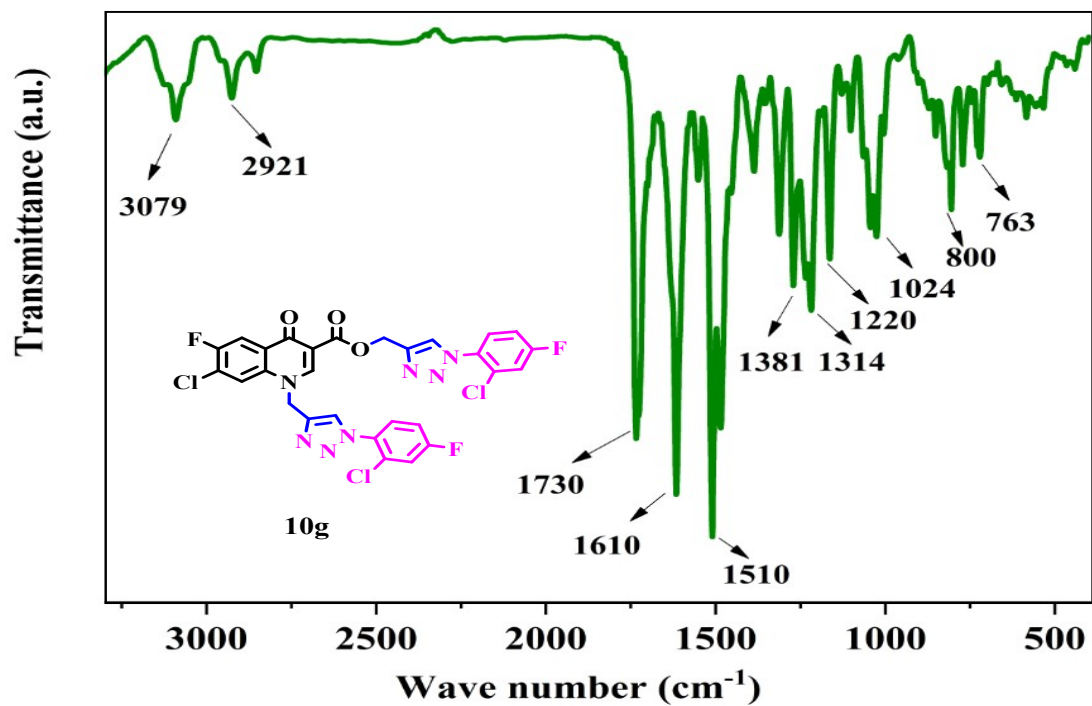

FT-IR of compound **10h**

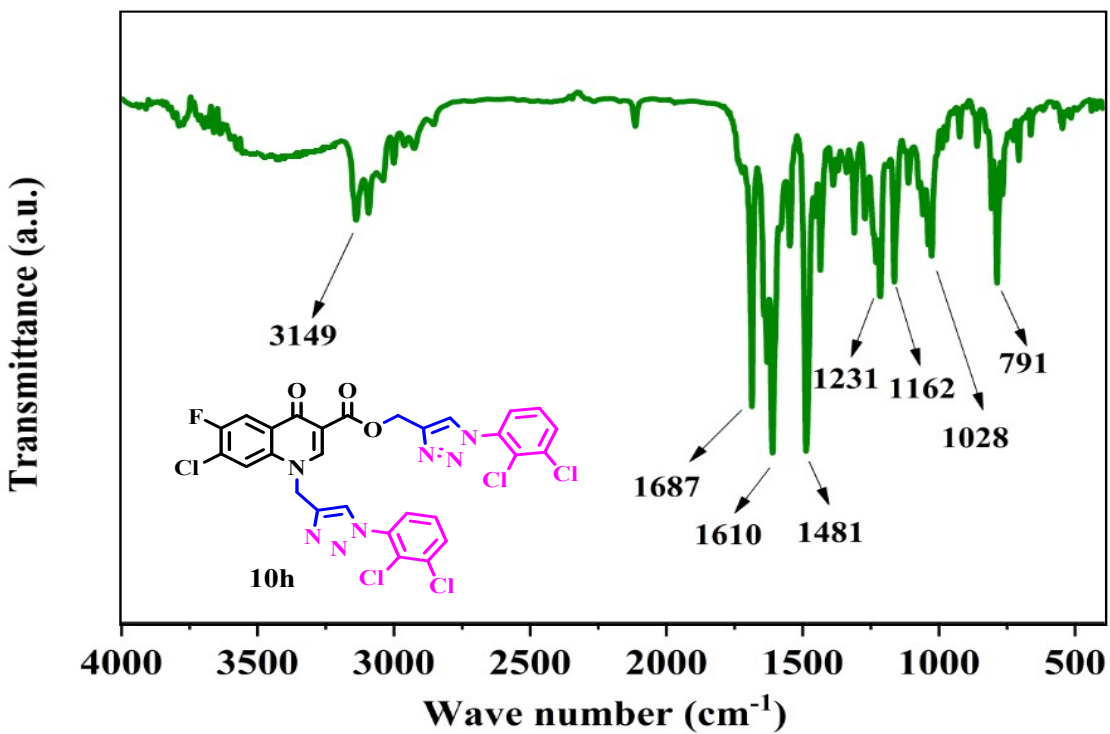



FT-IR of compound **10i**

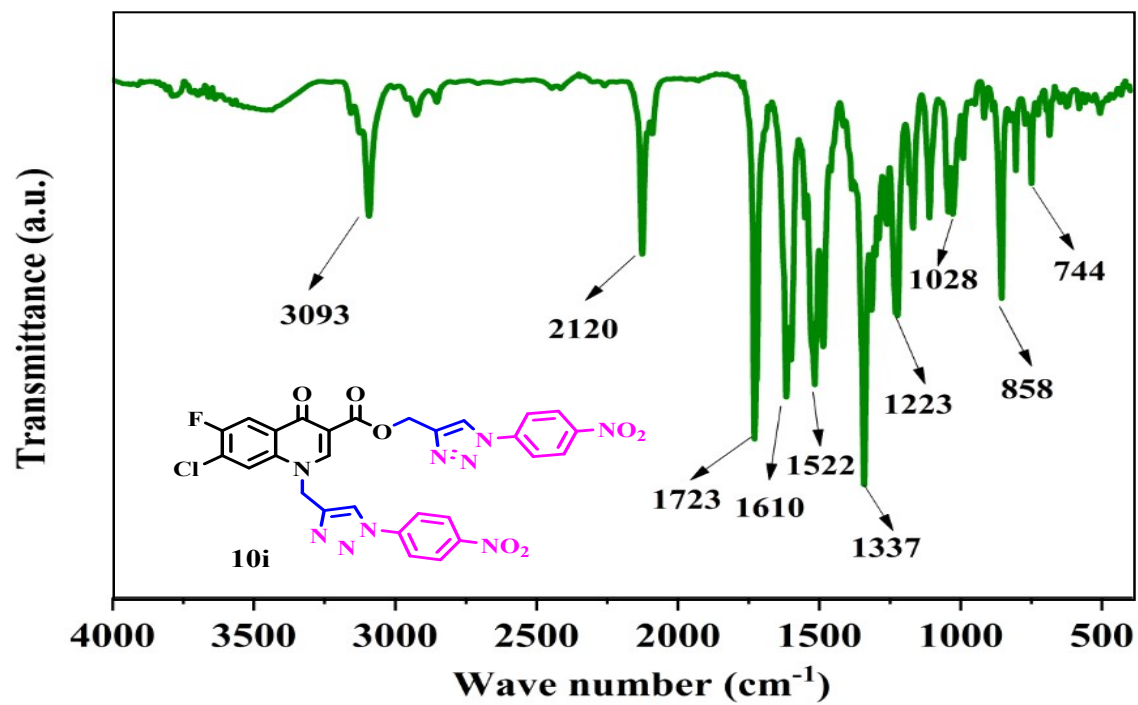

Supplement: d4ra08643k1.pdf [file d4ra08643k1.pdf]
